# Supplementary material for: Infectious mononucleosis in children and differences in biomarker levels and other features between disease caused by Epstein–Barr virus and other pathogens: a single-center retrospective study in China
Source: PeerJ. 2023 Apr 6;11:e15071. doi: 10.7717/peerj.15071 (PMC10083002; doi:10.7717/peerj.15071)
Supplement: Supplemental Information 1 [file peerj-11-15071-s001.xlsx]

## Sheet: data
gender	age	EB-DNA	EBV infection	dianosis	other pathogens	Atypical lymphocytes（%）	Fever days	Days in hospital	Fever	Tonsillar white coat	Cervical lymphadenopathy	Hepatomegaly	Splenomegaly	Eyelid edema	WBC before treatment	WBC after treatment	ALT before treatment	AST before treatment	TB before treatment	IB before treatment	ALP before treatment	LDH before treatment	CK before treatment	CK-MB before treatment	CD4 cells(%)	CD8 cells(%)	CD3 cells(%)
male	1.2406	/	1	Infectious Mononucleosis	Mycoplasma/adenovirus/cytomegalovirus	9	10	10	1	1	1	1	0	0	7.48	7.69	415	232	2.3	1.1	149	404	61	41	16	51	73
female	1.455	/	1	Infectious Mononucleosis	cytomegalovirus	5	6	7	1	1	0	1	1	0	12.51	9.23	40	37	7.9	3.8	111	390	34	22	19	60	82
male	1.456	1	1	Infectious Mononucleosis	adenovirus/Parvovirus	14	17	8	1	1	1	1	1	0	11.3	7.42	350	213	6	3.5	136	570	67	27	8	81	90
female	1.457	/	1	Infectious Mononucleosis	cytomegalovirus/Mycoplasma/	4	14	7	1	1	1	0	0	1	12.5	5.73	46	36	7.7	4.3	129	480	43	16
male	1.458	/	0	Infectious Mononucleosis		6	10	11	1	0	1	0	0	0	8.9	3.88	20	28	6.2	4.1	89	289	15	13	50	20	72
male	1.459	1	1	Infectious Mononucleosis		13	6	7	1	1	1	1	0	0	18.88	13.4	15	31	3.6	1.2	124	553	32	20	12	71	86
female	1.46	/	0	Infectious Mononucleosis		9	11	11	1	1	1	0	0	0	21.7	15.43	99	75	3.2	1.1	229	412	60	32
male	1.461	/	1	Infectious Mononucleosis	Mycoplasma/Parvovirus/Influenza B virus	10	16	10	1	1	0	1	1	0	13.65	9.1	102	110	11.2	4.3	423	630	245	35	15	68	83
female	1.462	1	1	Infectious Mononucleosis		12	5	7	1	1	1	1	1	0	12.1	9	62	55	6.6	3.4	239	518	35	27	20	60	86
male	1.463	/	1	Infectious Mononucleosis	cytomegalovirus	10	9	12	1	1	1	1	1	1	13.95	8.43	24	40	4.7	2.7	202	520	86	25
female	1.464	1	1	Infectious Mononucleosis	cytomegalovirus/Parvovirus	6	7	6	1	1	1	1	0	0	22.82	16.5	177	127	6	2.9	238	457	28	16	6	82	90
male	1.465	1	1	Infectious Mononucleosis		5	12	8	1	1	1	1	0	0	14.48	11.44	116	119	20.3	5.2	667	533	49	37	10	69	80
female	1.466	/	1	Infectious Mononucleosis	Mycoplasma	40	10	8	1	1	1	0	0	0	27.92	13.69	316	226	24.8	14.2	346	630	53	31
male	1.467	/	1	Infectious Mononucleosis	cytomegalovirus/Parvo virus	13	4	4	1	1	1	1	1	1	26.96	16.85	56	114	11.5	9.7		437	20	23
male	1.468	/	1	Infectious Mononucleosis	cytomegalovirus	20	4	7	1	1	1	1	0	0	22.66	18.26	133	88	6.1					52	5	85	93
male	1.469	/	1	Infectious Mononucleosis			20	11	1	1	1	0	0	0	2.27	1.82	170	265	7.4	4.6	361	500	36	33	23	57	82
male	1.47	/	1	Infectious Mononucleosis		8	9	10	1	1	1	1	0	1	18.91	10.29	416	321	20.7	3.4	322	551	24	18
male	1.471	/	1	Infectious Mononucleosis	cytomegalovirus	25	8	8	1	1	0	0	0	1	42.06	35.4	408	295	19.9	5.7	341	733	33	12
female	1.472	1	1	Infectious Mononucleosis	Mycoplasma/Parvovirus/cytomegalovirus	few	8	9	1	1	1	1	1	0	13.13	7.81	44	51	4.9	2.7	141	523	72	49	16	69	87
male	1.473	/	1	Infectious Mononucleosis	cytomegalovirus	20	4	10	1	1	1	1	0	0	9.45	7.42	115	158	5.2	2.3	338	447	66	28	10	75	86
male	1.474	1	1	Infectious Mononucleosis		14	6	5	1	0	0	1	1	0	24.72	18.55	34	36	4.3	2.2	213	414	78	32
male	1.475	1	1	Infectious Mononucleosis		few	8	10	1	1	1	1	0	0	16.76	11.5	31	48	5.6	2.7	190	516	68	23	9	67	79
male	1.5998	/	1	Infectious Mononucleosis		10	4	8	1	1	1	1	0	1	12.56	8.01	80	45	8.3	5.5	250	584	69	38
male	1.4155	/	1	Infectious Mononucleosis	cytomegalovirus/Mycoplasma/adenovirus	3	11	9	1	0	1	1	0	0	30.3	15.9	152	109	5.6	2.7	181	504	42	34	15	58	79
female	3.8333	/	1	Infectious Mononucleosis	adenovirus/cytomegalovirus	8	7	9	1	1	0	0	0	1	10.33	6.73	19	32	4.5	2.4	152	429	37	20
female	4.4167	/	1	Infectious Mononucleosis	Parvovirus	few	12	10	1	1	1	0	0	1	15.09	11.9	432	449	9.8	3	297	610	26	20	17	58	87
female	0.6995	/	1	Infectious Mononucleosis		6	13	12	1	1	0	1	1	0	15.91	11.87	147	167	5.2	2.8	151	504	29	17	22	46	68
male	5.5	1	1	Infectious Mononucleosis		20	6	11	1	1	1	0	0	1	24.83	13.9	424	354				811	120	71	8	59	78
female	1.8553	1	1	Infectious Mononucleosis	cytomegalovirus	7	2	10	1	1	1	1	1	0	11.87	8.65	102	194	5.2	2.9	475	599	60	33	15	61	80
female	6.4167	1	1	Infectious Mononucleosis	cytomegalovirus/Mycoplasma/adenovirus	20	10	13	1	1	1	0	1	0	16.74	9.61	340	222	34.8	6.7	395	469	24	16	7	82	91
female	3.5	1	1	Infectious Mononucleosis	Influenza B virus	2	6	8	1	1	1	0	1	0	27.35	19.8	48	79	4.7	2.8	178	631	83	39	8	91	80
female	2.6667	/	1	Infectious Mononucleosis		6	14	7	1	1	1	1	0	1	18.26	7.02	81	56	3.9	1.4	501	643	70	22
male	1.4961	2	1	Infectious Mononucleosis	cytomegalovirus	15	5	9	1	1	1	0	0	1	22.3	12.26	28	62	4.6	3	174	697	56	35
female	1.6573	1	1	Infectious Mononucleosis		3	5	8	1	1	1	1	0	0	25.21	18.8	37	45	2.5	1.3	182	551	53	26
female	4.8333	/	1	Infectious Mononucleosis	cytomegalovirus	6	7	10	1	1	0	1	1	0	13.22	9.83	50	83	4.4	2.1	136	607	80	24
male	2.8333	/	1	Infectious Mononucleosis	cytomegalovirus	7	6	8	1	1	1	0	0	0	24.5	7.06	51	68	3.6	1.3	203	526	85	29
male	1.5411	1	1	Infectious Mononucleosis	cytomegalovirus	20	6	10	1	1	1	0	0	1	29.69	17.5	126	135	7.3	2.9	281	533	43	26	8	76	89
male	3.1667	1	1	Infectious Mononucleosis	Mycoplasma/cytomegalovirus	19	3	8	1	1	1	1	1	0	12.87	9.09	53	52	3.5	2.3	136	545	111	52	11	57	75
male	3.4167	1	1	Infectious Mononucleosis	cytomegalovirus	15	5	11	1	1	1	1	0	0	12.61	9.09	447	448	12.3	8	470	626	81	31	8	65	81
male	3.75	1	1	Infectious Mononucleosis	adenovirus/Influenza B virus	20	16	8	1	1	1	1	0	1	25.61	13.4	30	39	4.5	2.7	132	503	162	52	8	71	86
male	4.3333	/	1	Infectious Mononucleosis		21	4	12	1	1	1	1	0	1	16.58	8.37	71	45	5.1	2.8	185	69	46	21
male	1.2078	/	1	Infectious Mononucleosis	cytomegalovirus/Mycoplasma	7	9	8	1	1	1	0	0	0	13.2	8.09	27	43	3.9	2.7	166	421	188	37
female	5.25	/	1	Infectious Mononucleosis	Mycoplasma/Parvovirus	7	8	13	1	0	1	0	0	1	6.66	2.46	45	88	4.8	2.2	224	416	62	21
male	5.8333	1	1	Infectious Mononucleosis	cytomegalovirus/Parvovirus/Mycoplasma	12	6	8	1	1	1	1	0	0	16.35	9.9	10	21	4.1	1.9	104	307	29	19	10	76	89
female	4.75	/	1	Infectious Mononucleosis	Mycoplasma	7	8	11	1	1	1	0	1	0	15.66	8.91	111	76	9.7	3	243	536	84	29
male	3.8333	1	1	Infectious Mononucleosis	cytomegalovirus/Parvo virus/Influenza B virus	10	5	10	1	1	1	1	0	0	8.41	5.27	29	33	3.3	1.7	142	332	42	17	14	71	87
female	2.8333	1	1	Infectious Mononucleosis		30	8	7	1	1	1	1	0	0	10.33	7.83	17	33	7.5	4.5	207	439	55	25
male	8.9167	1	1	Infectious Mononucleosis	Parvovirus	12	14	8	1	1	1	1	0	0	24.52	17.9	87	76	30.5	20.7	170	796	45	28	9	71	85
male	3.25	1	1	Infectious Mononucleosis	Mycoplasma/Parvovirus	30	9	10	1	1	1	1	0	1	27.03	20.2	257	140	14.8	5.6	282	639	40	30	9	82	93
male	3.0833	/	1	Infectious Mononucleosis	cytomegalovirus/Parvovirus/Influenza B virus/Mycoplasma		2	9	0	1	1	1	1	1	9.5	4.95	111	75						17
female	4.3333	1	1	Infectious Mononucleosis	cytomegalovirus	22	9	7	1	1	1	1	0	0	11.2	6.83	31	38	3.4	2.1	137	442	41	16
male	5.8333	/	1	Infectious Mononucleosis	cytomegalovirus	15	6	13	1	1	1	1	1	0	21.99	11.99	337	113	20.7	8.2	496	450	54	18
male	9.6667	/	1	Infectious Mononucleosis	Parvovirus	15	6	7	1	1	1	1	0	1	17.09	9.52	341	367	92.9	21.1		1202	138	25
female	4.1667	1	1	Infectious Mononucleosis	Mycoplasma	13	8	7	1	1	1	0	0	0	14.82	7.9	121	52	3.3	1.4	174	344	63	19	15	70	89
female	1.8744	/	1	Infectious Mononucleosis		8	3	9	1	1	1	1	1	1	12.81	8.04	61	57	4.6	3.3	162	695	118	23
male	3.5833	/	1	Infectious Mononucleosis	cytomegalovirus/Parvovirus/Mycoplasma/adenovirus	12	7	8	1	1	1	0	0	0	11.96	9.1	75	104	5.1	2.4	165	422	59	31	9	66	77
male	0.8361	/	1	Infectious Mononucleosis	Mycoplasma/cytomegalovirus	8	14	8	1	0	1	1	0	0	16.47	12.48	14	37	5.3	1.6	168	343	59	29
female	3.9167	/	1	Infectious Mononucleosis	Mycoplasma	7	0	7	0	0	1	1	0	1	11.42	7.52	30	41	3.8	2.3	178	409	204	22
female	2.8333	1	1	Infectious Mononucleosis	Mycoplasma		6	8	1	1	1	0	0	0	20.15	9.22	36	47	3.3	1.6	135	462	38	15
female	3.0833	1	1	Infectious Mononucleosis	Mycoplasma	13	0	7	0	1	1	0	0	1	12.89	6.68	32	49	5.5	2.9	186	460	93	24
male	5.4167	1	1	Infectious Mononucleosis	Mycoplasma/Parvovirus/Influenza B virus	20	10	9	1	1	1	0	0	1	17.17	12.11	68	63	8.6	7.3		544	35	13	5	78	85
female	6.5	1	1	Infectious Mononucleosis	Mycoplasma	few	0	7	0	1	1	1	1	1	15.36	8.75	61	81	6.3	3.4	198	583	667	16
male	5.9167	/	1	Infectious Mononucleosis	Parvovirus/cytomegalovirus/adenovirus	16	9	9	1	1	1	1	1	0	17.26	11.5	49	33	6	3.3	162	484	25	11	6	81	91
male	3	/	1	Infectious Mononucleosis	Mycoplasma/cytomegalovirus	8	6	11	1	1	1	1	0	0	25.66	13.06	103	75	3.6	1.6	216	620	41	27	22	61	91
male	2.1667	1	1	Infectious Mononucleosis	Mycoplasma/LegioLegionella pneumophila/cytomegalovirus/Parvovirus	10	13	9	1	1	1	0	0	1	10.77	5.37	23	52	8.5	4.9	127	553	70	37
male	1.9018	/	1	Infectious Mononucleosis		18	9	9	1	1	1	1	0	1	25.75	13.99	58	63	2.1	1.6	167	874	106	46
male	1.6381	/	1	Infectious Mononucleosis		10	0	8	0	1	1	1	0	1	19	6.58	54	65	3.9	1.9	198	625	361	54
male	0.813	1	1	Infectious Mononucleosis	Mycoplasma/adenovirus	20	9	14	1	0	0	1	1	0	37.69	25.5	63	72	25	11	92	677	72	24	7	76	84
female	1.6025	1	1	Infectious Mononucleosis		6	6	9	1	1	1	0	0	0	10.94	5.33	109	118	3.1	1.9	175	475	54	33
male	4.1667	1	1	Infectious Mononucleosis	cytomegalovirus/Mycoplasma/Influenza B virus	20	12	12	1	0	1	1	0	0	18.71	13.43	34	73	4.6	3	152	923	184	50
male	2.0833	/	1	Infectious Mononucleosis	cytomegalovirus	7	9	7	1	1	0	1	0	0	17.68	6.56	374	239	7.6	3.1	294	642	42	22
female	9.5	1	1	Infectious Mononucleosis		10	7	7	1	1	1	1	0	0	12.47	4.63	31	34	7.8	4.2	198	434	93	12	17	62	84
male	1.1025	/	0	Infectious Mononucleosis		8	5	7	1	1	1	0	0	1	17.92	10.64	36	63	2.8	0.8	162	398	173	35
female	6.1667	1	1	Infectious Mononucleosis	cytomegalovirus	few	9	8	1	1	1	1	1	0	15.59	8.98	131	116	8.1	3.9	506	639	73	24	13	72	88
female	1.7527	1	1	Infectious Mononucleosis	adenovirus/Mycoplasma	15	8	8	1	1	1	0	0	1	13	5.77	123	62	5.1	3.5	189	485	68	23
female	1.1436	1	1	Infectious Mononucleosis	cytomegalovirus	16	4	7	1	0	0	1	0	1	10.76	9.09	34	78	2.7	1.9	171	602	160	36	28	42	73
female	2.5833	/	1	Infectious Mononucleosis	Parainfluenza virus/cytomegalovirus/Mycoplasma	20	5	11	1	1	1	0	0	0	30.23	17.6	23	45	3.4	1.9	89	461	135	25	10	66	84
male	1.8361	1	1	Infectious Mononucleosis	Mycoplasma	few	9	8	1	0	1	1	0	0	11.25	6.82	14	40	4.3	2.4	173	608	94	21
male	5.6667	/	1	Infectious Mononucleosis	cytomegalovirus	few	12	4	1	1	1	1	0	0	23.01	17.8	144	76	6.8	6	175	513	54	12
male	1.2215	1	1	Infectious Mononucleosis	cytomegalovirus	12	30	6	1	1	1	1	1	0	17.54	12.6	29	45	4.9	3.5	195	532	63	25	12	65	83
male	4.75	1	1	Infectious Mononucleosis		31	10	9	1	1	1	0	0	0	17.12	12.2	99	158	6.8	4.8	157	851	123	20
male	4.8333	1	1	Infectious Mononucleosis		15	4	7	1	1	1	1	0	0	16.75	10.81	13	34	4	2	144	469	28	17	14	72	87
male	3.4167	1	1	Infectious Mononucleosis	cytomegalovirus/Mycoplasma/adenovirus	25	4	5	1	1	1	1	1	0	16.84	12.3	25	33	6.6	4.7	181	504	41	14	19	64	86
male	1.5247	/	1	Infectious Mononucleosis	cytomegalovirus/adenovirus	5	8	12	1	1	1	1	0	0	20.98	9.9	502	228	5.4	3.5	312	541	61	23
female	1.2692	/	1	Infectious Mononucleosis	cytomegalovirus	21	8	8	1	1	1	1	0	1	32.54	15.04	309	126	5.7	4.6	242	690	46	21
male	4.4167	1	1	Infectious Mononucleosis	adenovirus/Mycoplasma	12	7	9	1	1	1	1	1	1	18.17	8.38	201	143	11.5	5.2	389	635	183	32	9	78	89
female	3.5833	/	1	Infectious Mononucleosis	cytomegalovirus	19	0	9	0	1	1	1	1	1	20.91	10.36	94	83	16.1	12	285	614	101	30
male	3.4167	1	1	Infectious Mononucleosis	cytomegalovirus/Mycoplasma	15	5	7	1	1	1	0	0	0	12.95	6.53	25	37	8.6	6.2	213	382	118	32	17	59	84
male	6.5833	/	1	infectious Mononucleosis	adenovirus/Mycoplasma/Influenza B virus	17	8	9	1	1	1	0	0	0	14.12	6.31	97	74	6.3	3.2	295	413	36	17
male	4.9167	1	1	infectious Mononucleosis	cytomegalovirus/ParvovirusB19/Acinetobacter haemolyticus	12	5	8	1	1	1	0	0	1	18.53	12.88	25	46	8.6	3.5	129	533	172	18	10	61	81
female	6.1667	1	1	infectious Mononucleosis		26	6	6	1	1	1	1	1	1	12.69	9.29	173	85	14.3	8.2	455	475	47	12	14	71	88
male	1.9358	/	1	infectious Mononucleosis		30	8	6	1	1	1	1	1	0	14.01	11.76	69	83	6.7	5.2	165	641	184	29
male	0.9358	1	1	infectious Mononucleosis		8	6	8	1	1	1	1	0	0	20.39	17.49	42	152	6.6	3.1	182	646	292	21
male	1.8909	1	1	infectious Mononucleosis	cytomegalovirus	few	0	7	0	1	1	1	0	1	19.8	15.7	78	62	6.8	5.6	286	531	65	20	17	58	80
female	6.25	/	0	infectious Mononucleosis	cytomegalovirus	10	14	8	1	1	1	0	0	0	5.84	1.64	20	49	6.1	4.8	95	658	44	13
male	4.6667	/	1	infectious Mononucleosis		20	10	6	1	1	1	1	0	0	21.45	11.38	24	31	5.5	3.3	178	534	65	18
female	7.5833	1	1	infectious Mononucleosis		12	9	4	0	1	1	1	0	0	7.85	6.13	91	59	11.1	8	215	631	71	14
female	3.4167	/	1	infectious Mononucleosis		15	5	7	1	1	1	0	0	0	7.53	2.22	10	28	9.3	2.9	153	273	94	23
male	4.25	1	1	infectious Mononucleosis	cytomegalovirus	28	0	8	0	1	1	1	0	0	22.03	15.8	42	51	6.1	3.9	194			38	12	75	90
male	4.4167	1	1	infectious Mononucleosis		10	6	7	0	1	1	1	1	1	6.31	2.59	60	49	4.8	3	152	461	50	13	30	55	87
male	3.8333	/	0	infectious Mononucleosis		10	6	3	1	1	0	1	0	0	12.6		9	19	4	2.2	142	243	41	13	39	28	71
female	2.25	1	1	infectious Mononucleosis	cytomegalovirus	10	9	5	1	1	1	1	1	1	16.57	9.9	62	88	12.7	10.7		593	58	26
male	7.4167	/	0	infectious Mononucleosis		12	15	12	1	1	1	1	0	0	17.77	7.38	88	82	16.6	14.1	594	834	84	15	59	32	91
female	2.75	1	1	infectious Mononucleosis	Mycoplasma	20	9	8	1	1	1	1	0	1	28.41	14.82	138	62	16.4	9.7	418	601	57	7	15	70	89
male	5.75	/	1	infectious Mononucleosis	cytomegalovirus	7	10	11	1	1	1	1	1	1	11.12	4.72	46	72	7.8	5.9	173	665	129	23
male	8.1667	/	1	infectious Mononucleosis		few	7	6	1	1	1	0	0	1	15.62	6.44	9	29	7.7	5.4	138	515	130	12	14	73	87
female	1.4578	1	1	infectious Mononucleosis	cytomegalovirus/Mycoplasma	few	4	8	1	1	1	1	1	1	21.84	9.81	21	36	6.5	4.5	183	465	25	18	27	54	82
male	3	1	1	infectious Mononucleosis	Parvovirus/Mycoplasma	38	30	6	1	1	1	1	1	0	8.18	6.16	100	77	4.3	2.2	87	345	48	15	31	46	80
male	1.5575	1	1	infectious Mononucleosis		18	6	7	1	0	1	1	0	1	20.62	14.7	37	78	3.6	2	123	809	92	26
male	3.3333	1	1	infectious Mononucleosis	cytomegalovirus	20	11	8	1	1	1	1	1	0	17.93	12.3	30	36	9.6	3.4	128	426	46	26	10	75	86
male	3.5	/	0	infectious Mononucleosis		12	4	7	1	1	1	1	0	1	22.47	12.43	171	90	6.9	6.7	333	534	79	22
male	5	/	1	infectious Mononucleosis		9	0	7	0	1	1	1	1	1	22.97	10.77	96	47	7.1	5	383	723	110	17
male	2.1667	/	1	infectious Mononucleosis		10	7	6	1	1	1	0	0	1	21.38	8.3	170	90	7	4.9	348	698	55	16
male	3.0833	1	1	infectious Mononucleosis	cytomegalovirus	10	4	8	1	1	1	1	1	0	23.68	13	28	58	6.3	6	159	701	73	11	12	71	83
male	11.4167	1	1	infectious Mononucleosis	ParvovirusB19/Legionella pneumophila	20	9	19	1	1	1	1	1	0	10.02	3.87	103	104	22.9	11.6	264	652	72	12	8	78	88
male	3.0833	1	1	infectious Mononucleosis	Mycoplasma	25	9	10	1	1	0	1	1	0	15.74	10.38	45	59	6.9	4.7	166	488	70	21	1	72	85
male	3	1	1	infectious Mononucleosis	Mycoplasma	10	11	9	1	1	1	0	0	1	15.5	9.35	82	59	14	7.2	358	427	45	22
female	6.9167	1	1	infectious Mononucleosis	Mycoplasma	12	17	8	1	1	1	0	1	0	12.19	5.91	157	104	6.6	4.5	226	501	72	15
female	4.5	1	1	infectious Mononucleosis		12	5	7	1	1	1	1	0	1	14.52	10.35	66	120	4.8	0.8	174	1583	230	159	16	57	78
male	3.4167	1	1	infectious Mononucleosis	Mycoplasma/cytomegalovirus/Streptococcus pneumoniae	few	8	11	1	1	1	1	0	1	11.53	6.46	367	459	10.9	6.2	422	856	52	27
male	2.4167	1	1	infectious Mononucleosis	cytomegalovirus	6	0	10	0	1	1	1	0	0	21.73	12.5	16	26	3	1.3	133	311	58	41	21	53	77
male	1.0767	1	1	infectious Mononucleosis	cytomegalovirus	22	2	7	1	0	1	1	1	0	15.42	9.6	95	91	5.4	3.3	198	462	78	26	14	52	77
male	12.5833	/	1	infectious Mononucleosis		12	6	7	1	1	1	0	1	0	13.49	4.98	234	178	7.5	3.7	260	489	72	27
female	5.0833	/	1	infectious Mononucleosis		10	5	10	1	1	1	1	1	0	13.32	5.07	42	52	7.7	4.9	147	535	93	24
male	7.75	/	1	infectious Mononucleosis	ParvovirusB19/Mycoplasma	10	14	13	1	1	1	1	1	1	26.03	15.86	198	151	8	5.1	156	568	58	23
male	3.3333	1	1	infectious Mononucleosis		few	8	7	1	1	1	0	0	1	20.97	6.33	44	61	5.4	3.8	229	445	59	21	15	76	92
male	3.5	1	1	infectious Mononucleosis	cytomegalovirus	20	5	8	1	1	1	1	1	0	21.21	15.96	164	109	7.1	5	327	542	62	41	15	66	89
male	1.4742	/	0	infectious Mononucleosis	ParvovirusB19	9	5	7	1	0	1	1	0	0	11.51	7.26	106	129	7.2	4.5	185	363	66	29
female	3.9167	1	1	infectious Mononucleosis	ParvovirusB19	4	6	6	1	1	1	1	0	0	15.1	6.43	69	69	6.3	4.7	212	638	134	40	11	69	85
female	4	1	1	infectious Mononucleosis	cytomegalovirus/Mycoplasma/adenovirus/Influenza B virus	25	13	12	1	1	1	1	1	1	24.31	14.1	34	33	5.5	3.2	174	655	79	46	6	77	87
male	3.9167	1	1	infectious Mononucleosis	cytomegalovirus/ParvovirusB19	20	11	7	1	1	1	1	0	0	15.37	8.66	33	45	5.2	3.5	161	513	57	27	16	64	86
male	4.25	1	1	infectious Mononucleosis		5	9	8	1	1	1	1	1	0	16.06	10.01	14	51	6	3.8	156	547	70	32	8	78	91
male	1.5603	/	1	infectious Mononucleosis		16	4	5	1	1	1	1	0	0	17.84	11.35	86	62	4.8	3.2	203	498	52	29
male	1.4167	/	1	infectious Mononucleosis		11	8	3	1	1	1	1	1	0	27.52	18.86	113	86	2.9	1.4	392	725	81	46	15	62	83
male	1.6299	1	1	infectious Mononucleosis	Acinetobacter baumannii/Acinetobacter calcoaceticus/cytomegalovirus/Mycoplasma	6	13	15	1	1	1	1	1	0	14.16	7.1	86	95	14.8	7.6	510	713	27	25	17	71	88
female	3.5833	1	1	infectious Mononucleosis	Mycoplasma	20	4	6	1	1	1	1	0	1	19.69	11.85	200	147	9.7	8.3	515	884	110	87	13	72	88
female	2.9167	1	1	infectious Mononucleosis	cytomegalovirus/Influenza B virus		21	4	1	1	1	1	0	0	5.22	4.05	14	31	7.2	4.6	91	305	70	30
female	1.4073	1	1	infectious Mononucleosis	ParvovirusB19/Mycoplasma	few	3	6	1	1	1	1	0	1	42.29	31.4	139	135	10.2	7.2	190	932	62	41	19	65	85
female	5.3333	1	1	infectious Mononucleosis	ParvovirusB19/cytomegalovirus	15	16	5	1	1	1	1	0	0	19.05	10.56	44	84	10.1	5.9	264	489	22	16	13	76	90
female	4.8333	1	1	infectious Mononucleosis		14	4	6	1	1	1	1	1	1	13.38	10.66	22	32	5.8	3.6	190	563	55	35	11	71	84
male	5.25	/	1	infectious Mononucleosis	cytomegalovirus	15	5	7	1	1	1	1	1	1	15.73	8.06	141	59	10.3	8	439	605	70	49
female	1.3048	/	0	infectious Mononucleosis	staphylococcus sciuri/Mycoplasma/Influenza B virus/Parvovirus	15	7	11	1	0	1	1	0	0	12.84	8.24	239	222	25.9	10.2	552	720	71	32	24	52	70
male	1.6721	1	1	infectious Mononucleosis	Mycoplasma/Influenza B virus/ParvovirusB19	few	14	10	1	1	1	1	1	0	36.16	20.87	24	39	4.8	2.7	180	643	198	40
male	3	/	1	infectious Mononucleosis	cytomegalovirus/	20	4	8	1	1	1	1	1	1	18.49	10.02	46	56	3.7	1.3	186	620	76	22
female	7.25	1	1	infectious Mononucleosis	Mycoplasma/Influenza B virus	13	6	7	1	1	1	1	0	0	7.98	3.25	30	40	7.4	4	134	398	38	22
female	5.5833	/	1	infectious Mononucleosis	Mycoplasma/Influenza B virus/cytomegalovirus	14	5	6	1	0	1	1	1	0	11.86	7.1	49	46	4.5	2	166	467	41	4
male	5.5833	1	1	infectious Mononucleosis	cytomegalovirus/Mycoplasma	12	3	7	1	1	1	1	1	0	12.81	7.1	75	60	7.6	4.2	289	607	67	25
male	3.5833	1	1	infectious Mononucleosis	Mycoplasma/ParvovirusB19/cytomegalovirus	10	5	6	1	1	1	0	1	0	13.94	9.37	41	49	6	2.1	225	651	110	49	13	60	82
male	3.5833	1	1	infectious Mononucleosis	Mycoplasma/adenovirus/	15	17	11	1	1	1	1	1	0	19.52	12.2	188	107	15.9	7.2	487	427	35	25
male	4.3333	1	1	infectious Mononucleosis		20	1	11	1	0	1	1	1	0	13.58	8.29	16	40	7.4	5.3	656	677	104	48	9	76	87
male	4.6667	1	1	infectious Mononucleosis		19	13	9	1	1	1	0	0	0	28.98	20.2	12	28	8.1	4.7	177	503	34	26	12	70	84
male	3.4167	/	1	infectious Mononucleosis	cytomegalovirus/Parvovirus/Mycoplasma	12	4	7	1	1	1	1	0	0	13.81	4.06	16	37	5.3	3.6	185	519	75	33
female	7.5	/	1	infectious Mononucleosis	cytomegalovirus	6	0	6	0	1	1	0	0	1	9.07	4.9	73	67	9.5	6.1	223	322	35	19	22	61	84
male	2.8333	1	1	infectious Mononucleosis		18	7	8	1	1	1	1	1	0	15.68	8.5	44	61	7.3	5.3	265	832	77	52	10	75	87
male	4	1	1	infectious Mononucleosis		18	11	7	1	1	1	1	1	1	14.46	12.03	205	97	9.5	5.5	485	479	76	28	17	66	86
male	2.6667	1	1	infectious Mononucleosis	cytomegalovirus/Parvovirus/Mycoplasma	30	6	6	1	1	1	1	1	0	20.6	16.7	46	65	3.9	2.2	123	567	43	27	14	77	92
male	1.3799	/	1	infectious Mononucleosis	cytomegalovirus/Parvovirus	12	3	7	1	1	1	1	1	1	33.64	16.12	177	198	8.7	4.4	538	734	38	22
female	3.25	/	1	infectious Mononucleosis	Mycoplasma/Influenza B virus	4	4	4	1	1	1	1	1	1	21.42	12.54	28	39	8.1	5.5	153	540	76	39
male	4.6667	/	1	infectious Mononucleosis	cytomegalovirus/Mycoplasma	8	6	10	1	1	1	1	1	0	8.6	3.79	227	159	7.3	5	340	492	55	33	15	71	88
female	2.5833	1	1	infectious Mononucleosis	Mycoplasma/cytomegalovirus/ParvovirusB19	few	2	7	1	1	1	1	1	1	14.81	7.16	67	49	13.7	4.8	210	525	49	25	25	47	77
female	5.6667	1	1	infectious Mononucleosis	ParvovirusB19	20	5	9	1	1	1	1	0	0	14.76	12.55	120	202	6.6	4.2	236	724	45	39	10	70	88
male	3.5833	1	1	infectious Mononucleosis		20	12	6	1	1	1	1	1	1	22.44	16.4	108	103	6.1	4.4	247	701	74	48	12	75	90
female	2.75	1	1	infectious Mononucleosis	Mycoplasma/Influenza B virus/ParvovirusB19/cytomegalovirus	20	6	4	1	1	1	1	0	0	22.52	16.5	32	55	6.9	5.7	205	761	59	29	16	72	91
female	1.5274	/	1	infectious Mononucleosis	cytomegalovirus/Parvovirus	12	1	7	1	0	0	1	1	1	10.84	6.34	135	66	7.8	4.1	472	516	45	26
male	0.9167	1	1	infectious Mononucleosis	Mycoplasma/adenovirus/cytomegalovirus	18	0	7	0	0	1	1	0	0	21.86	17.2	85	87	4.5	3.5	316	639	113	69
male	6.1667	1	1	infectious Mononucleosis	Mycoplasma/Influenza B virus/Parvovirus	8	6	6	1	1	1	1	1	1	13.92	7.98	11	34	4.8	2.8	140	420	51	21	14	63	82
male	1.5219	1	1	infectious Mononucleosis	Influenza B virus	5	4	7	1	1	1	1	1	0	24.05	14.14	220	333	5.2	3.1	166	708	26	21
male	2.0833	/	1	infectious Mononucleosis	cytomegalovirus	15	10	9	1	1	1	1	1	0	17.18	10.48	67	66	2	0.2	257	692	78	17
male	3.75	1	1	infectious Mononucleosis	Influenza B virus	22	12	12	1	1	1	1	1	0	25.24	18.6	749	624	19.5	7.6	444	622	92	36	14	70	88
male	5.1667	1	1	infectious Mononucleosis	cytomegalovirus	28	5	4	1	1	1	1	0	0	21.14	15.3	33	58	4	2.4	132	535	66	40	13	76	91
male	3.6667	/	1	infectious Mononucleosis	Mycoplasma/cytomegalovirus	5	1	6	1	1	1	0	1	0	13.04	6.14	14	31	6.8	3.9	135	439	91	32
male	6.9167	1	1	infectious Mononucleosis		13	7	7	1	1	1	1	1	0	22.12	17.22	296	242	7.8	5	513	740	81	33	6	79	89
male	6.5	1	1	infectious Mononucleosis		7	14	6	1	1	1	1	1	0	9.84	4.19	46	41	2.5	0.8	140	522	50	27	12	63	81
male	3.4167	1	1	infectious Mononucleosis	Parvovirus/Mycoplasma	13	2	9	1	1	1	1	1	0	24	20.05	73	66	6	3.8	196	618	79	36	8	74	88
male	3.1667	1	1	infectious Mononucleosis	Parvovirus/Q thermal rickettsia	7	21	6	1	1	1	1	1	0	12.2	7.87	37	42	3.7	1.4	178	602	53	17
female	2.5833	/	1	infectious Mononucleosis	cytomegalovirus	few	6	10	1	1	1	1	0	1	14.29	6.07	44	47	7	4.5	226	563	44	27
female	2.5	/	1	infectious Mononucleosis	cytomegalovirus	8	5	6	1	1	1	1	0	0	17.6	6.67	12	31	9.6	6.4	176	441	52	40
male	3.1667		1	infectious Mononucleosis		7	10	9	1	1	1	1	1	1	17.03	8.09	117	98	5.3	2.5	564	757	59	32
male	1.0943		1	infectious Mononucleosis	cytomegalovirus/Rotavirus	15	7	7	1	1	1	0	0	1	18.61	9.6	35	50	3.9	1.7	190	632	59	32
male	4.8333	1	1	infectious Mononucleosis	cytomegalovirus/Influenza B virus/Parvovirus	13	13	9	1	1	1	1	0	0	7.07	3.89	13	27	5.3	3	117	339	50	25	28	34	74
male	4.6667	1	1	infectious Mononucleosis	Influenza B virus/ParvovirusB19/Mycoplasma		9	7	1	0	1	1	0	1	12.37	6.02	84	81	8	4.8	189	610	105	39
female	7.5	1	1	infectious Mononucleosis	Mycoplasma	22	3	16	1	1	0	0	0	1	8.71	3.63	18	36	8	6	115	508	51	39
female	5.6667	1	1	infectious Mononucleosis	ParvovirusB19	30	9	9	1	1	1	1	1	1	18.78	13.6	309	277	13.4	7.9	296	605	29	19	13	74	88
female	2.5833	1	1	infectious Mononucleosis	Mycoplasma	11	13	6	1	1	1	1	0	1	12.76	8.56	12	35	5.9	3.6	157	440	181	31	22	59	85
female	8.5	1	1	infectious Mononucleosis		15	6	6	1	1	1	0	0	0	16.37	9.85	59	68	8.6	5.7	168	644	62	35	12	74	90
male	2	1	1	infectious Mononucleosis	cytomegalovirus/Mycoplasma	30	6	7	1	1	1	0	1	1	25.66	15.42	64	50	8.3	6.5	128	912	122	95
male	5.6667	1	1	infectious Mononucleosis	ParvovirusB19/Mycoplasma/cytomegalovirus	20	19	7	1	1	1	1	0	0	11.69	6.46	22	35	6.3	3.2	200	344	30	25	9	71	87
male	2.0833	1	1	infectious Mononucleosis	cytomegalovirus	8	7	7	1	1	1	1	1	1	12.87	8.2	34	48	5.2	3.6	205	594	80	57	11	60	74
male	1.2938		1	infectious Mononucleosis	cytomegalovirus	14	1	11	1	1	0	1	1	0	20.35	12.61	638	312	10.8	6.2	94	443	28	18
male	16.8333		1	infectious Mononucleosis	Parvovirus	15	6	7	1	1	1	1	1	1	19.82	13.49	61	81	22.6	13.6	111	757	42	19
female	8.0833	1	1	infectious Mononucleosis		28	7	7	1	1	1	1	0	0	11.21	6.42	211	130	11.9	5.5	337	558	45	14	8	79	88
male	5.8333	1	1	infectious Mononucleosis		14	3	4	1	1	1	1	0	1	14.84	9.33	48	62	4	2.3	218	716	103	61	11	69	83
female	3.0833		1	infectious Mononucleosis		8	0	9	0	1	1	1	1	1	10.6	7.51	249	81	6.4	2.5	309	524	63	25
male	4.75	1	1	infectious Mononucleosis	cytomegalovirus	7	9	5	1	1	1	1	0	0	20.65	15.65	69	56	5.4	3.2	161	608	68	47	12	75	89
male	4.75	1	1	infectious Mononucleosis		10	0	6	0	1	1	1	1	0	7.01	5.14	256	148	2.1	0.5	169	495	85	24	24	59	85
male	5.5	1	1	infectious Mononucleosis	Mycoplasma	20	4	12	1	1	1	1	1	0	19.16	13.61	140	118	7.4	4.6	251	492	58	18
female	2.3333		1	infectious Mononucleosis	cytomegalovirus	15	6	7	1	1	1	1	0	1	22.97	15.1	83	86	6.7	3.7	232	587	61	28
female	4.6667	1	1	infectious Mononucleosis		35	6	6	1	1	1	1	1	1	28.79	13.59	243	104	32	17.1	296	571	59	37	11	80	94
male	4.0833	1	1	infectious Mononucleosis		6	5	9	1	1	1	1	1	1	54.64	38.26	41	74	5.4	3.4	209	739	42	35	14.49	66.88	87.99
male	3.6667	1	1	infectious Mononucleosis	cytomegalovirus/Parvovirus/Mycoplasma	20	10	10	1	1	1	1	1	1	33.27	15.44	88	88	8	4.8	194	707	73	32	18.79	69.18	92.52
male	4.25	1	1	infectious Mononucleosis		4	4	7	1	1	1	1	1	1	15.8	8.94	51	36	3.9	1.4	212	422	45	22	20	61	83
male	2.8333	1	1	infectious Mononucleosis	Mycoplasma/cytomegalovirus/ParvovirusB19	few	12	7	1	1	1	1	1	0	36.44	13.46	52	44	3.9	2.9	226	640	42	31	12.52	79.22	92.63
male	5.5	1	1	infectious Mononucleosis		5	3	7	1	1	1	1	1	0	17.73	12.53	316	168	4.8	3.7	329	647	84	59	8.2	64.36	77.52
male	1.6913		1	infectious Mononucleosis		25	5	7	1	1	1	1	0	1	11.86	8.91	28	53	4.8	2.5	176	577	164	33
female	4.5833	1	1	infectious Mononucleosis		20	10	7	1	1	1	1	1	0	20.95	13.99	131	53	19.4	9.1	276	494	19	15	9.88	77.34	92.69
female	5.75	1	1	infectious Mononucleosis	Mycoplasma	10	22	8	1	1	1	1	0	0	21.49	7.48	34	52	5.5	3	140	470	88	29
male	4.4167		1	infectious Mononucleosis		25	0	10	0	1	1	1	1	1	10.32	6.26	66	65	4.4	2.6	206	509	59	30
male	5.3333	1	1	infectious Mononucleosis	cytomegalovirus	17	3	5	1	1	1	1	1	0	9.81	5.53	22	38	5.2	2.9	144	384	60	6	15.85	54.48	74.63
male	2.8333	1	1	infectious Mononucleosis		8	3	4	1	1	1	0	0	0	16.96	11.15	27	35	3.5	1.8	191	377	40	28	12.92	63.71	80.58
male	1.1217	1	1	infectious Mononucleosis	cytomegalovirus/Mycoplasma	12	9	7	1	1	0	1	1	0	9.29	5.94	256	205	3.2	1.6	146	404	55	22	26.2	38.63	69.04
male	9.6667		1	infectious Mononucleosis		5	15	7	1	1	1	1	1	1	26.1	12.08	230	138	6	3.5	286	628	45	22
male	2.0833		1	infectious Mononucleosis	Mycoplasma/cytomegalovirus	3	4	8	1	1	1	1	0	1	27.42	20.9	314	100	6.4	4	322	672	46	30
male	4.8333	1	1	infectious Mononucleosis		10	3	7	1	1	1	0	0	0	8.69	5.09	13	49	7.8	5.8	146	527	130	68
male	2.6667	1	1	infectious Mononucleosis	cytomegalovirus/Mycoplasma	24	12	12	1	0	1	1	1	0	14.42	8.92	391	424	43.3	15.6		617	46	11
male	1.0027		1	infectious Mononucleosis		8	4	7	1	0	1	1	0	0	12.87	10.4	105	54	7.1	4.9	192	314	160	38
male	3.8333	1	1	infectious Mononucleosis		15	3	5	1	1	1	0	1	0	19.45	13.27	257	135	9.2	5.6	654	754	112	26	12.78	69.46	87.81
female	1.0833		1	infectious Mononucleosis		35	3	13	1	0	1	0	1	0	17.08	7.39	17	33	7.4	5.4	149	370	42	36
male	1.6381		1	infectious Mononucleosis	cytomegalovirus	16	6	6	1	1	1	1	0	0	26.58	19.03	19	32	6.3	4.6	172	435	53	28
female	5.25		1	infectious Mononucleosis		13	4	9	1	1	1	1	1	1	17.3	10.6	56	54	5	3.5	207	435	88	27	20.68	54.99	79.38
male	3.0833	1	1	infectious Mononucleosis	cytomegalovirus	few	8	8	1	1	1	1	1	0	11.57	8.69	251	156	5.3	4.2	237	565	67	40	13.87	65.93	85.3
female	10.3333		0	infectious Mononucleosis	Mycoplasma	12	0	6	0	1	1	1	0	0	6.51	3.63	10	13	10.4	7.1	155	185	40	20
female	5.6667		1	infectious Mononucleosis	Mycoplasma/cytomegalovirus	few	9	8	1	1	1	1	1	1	14.76	8.53	690	796				580	47	25	8.76	76.18	86.66
female	2.3333		1	infectious Mononucleosis	Mycoplasma/cytomegalovirus	10	5	9	1	1	1	1	1	0	22.77	15.36	68	81	8.8	7.2	261	901	113	88	11.15	72.01	85.66
male	7.9167	1	1	infectious Mononucleosis	Mycoplasma	16	4	11	1	0	1	1	0	0	14.49	9.84	64	81	28.7	10.7		430	43	14	13.28	69.77	91.9
female	1.847	1	1	infectious Mononucleosis		10	5	5	1	1	1	1	0	1	16.13	10.61	15	36	11.9	8.4	284	506	60	31	13.74	61.78	76.83
female	1.7801	1	1	infectious Mononucleosis	Mycoplasma	25	0	11	0	0	1	1	1	0	20.55	16.02	134	86	6.8	6.5	370	584	99	36
female	9.9167		1	infectious Mononucleosis	cytomegalovirus	few	2	7	1	1	1	0	0	0	10.68	5.75	75	44	9.3	7	166	545	46	31
male	3.6667	1	1	infectious Mononucleosis		10	7	9	1	1	1	1	1	0	18.63	10.9	17	45	6.9	5.4	235	713	67	46	9.57	73.93	88.32
male	5.6667		1	infectious Mononucleosis		few	4	12	1	1	1	1	0	1	13.73	11.33	247	202						23
male	3.9167	1	1	infectious Mononucleosis		3	5	7	1	1	1	0	0	0	23.23	6.58	17	42	5.1	3.6	183	612	100	96	11.96	51.17	65.86
male	2.4167		1	infectious Mononucleosis	cytomegalovirus	few	5	14	1	1	1	1	1	1	7.5	3.79	18	43	11.7	8.7	153	546	111	56
female	2.0833	1	1	infectious Mononucleosis		20	2	5	1	1	1	1	0	0	28.01	20.32	212	101	3.7	2.4	232	654	54	40	9.79	70.13	85.2
male	1.0998	1	1	infectious Mononucleosis		40	3	8	1	1	1	1	1	0	45.11	26.83	361	150	17.4	7.6	304	573	43	25	12.43	67.81	82.1
female	3.3333	1	1	infectious Mononucleosis	cytomegalovirus	5	14	9	1	1	1	1	0	0	16.76	10.44	124	123	2.5	0.9	271	458	41	20
female	14.9167		1	infectious Mononucleosis		12	3	8	1	1	1	1	0	0	20.03	16.12	392	270	36.1	20.7		753	55	4
male	2.4167	1	1	infectious Mononucleosis		5	8	9	1	1	1	1	1	1	15.55	7.87	13	37	6.8	3	153	369	54	33	11.05	68.55	84.9
male	4.5	1	1	infectious Mononucleosis	cytomegalovirus	14	5	7	1	1	1	0	0	0	12.02	7.09	19	27	6	3.6	143	383	48	19	12.36	60.59	76.35
male	1.1941		1	infectious Mononucleosis	cytomegalovirus	8	5	7	1	1	1	1	0	0	38.15	25.86	348	85	13.1	3.5		434	23	11	19.97	58.29	79.2
male	7.3333	1	1	infectious Mononucleosis		20	11	11	1	1	1	1	1	0	13.39	10.39	99	111	24.3	6.3		472	42	7	10.54	76.65	90.7
male	2.4167	1	1	infectious Mononucleosis	cytomegalovirus/Parvovirus/Legionella	11	5	6	1	1	1	1	0	0	11.1	7.16	85	71	8.2	4.8	214	657	89	38	13	62.75	79.55
female	5.8333	1	1	infectious Mononucleosis		15	13	6	1	1	1	0	0	0	16.35	11.44	189	84	5.5	3	369	1014	131	126
female	4		1	infectious Mononucleosis		18	5	4	1	1	1	1	1	0	7.74	5.63	40	41	5.3	2.7	148	511	57	34	15.48	70.99	89.52
female	5.9167	1	1	infectious Mononucleosis	cytomegalovirus/adenovirus	few	2	7	1	1	1	1	0	1	10.87	5.89	38	37	7.4	5.5	178	412	34	21
female	2.25	1	1	infectious Mononucleosis	cytomegalovirus	15	6	7	1	1	1	1	1	0	17.13	10.01	98	66	6.3	4	182	536	70	31
male	6.1667	1	1	infectious Mononucleosis	Parvovirus	17	5	6	1	1	1	1	1	0	16.16	13.19	23	24	2.9	1.4	136	351	52	44	12.48	76.31	90.52
male	1.466		1	infectious Mononucleosis	Mycoplasma	10	13	10	1	1	0	1	0	0	17.98	4.85	30	21	8.3	5.2	151	304	76	46
male	3.5833	1	1	infectious Mononucleosis	Parvovirus/Mycoplasma	25	8	7	1	1	1	0	0	0	19.85	10.48	30	35	4.2	2.1	154	482	37	16	11.56	83.12	95.16
male	2.4167		1	infectious Mononucleosis	cytomegalovirus	20	4	8	1	1	0	0	0	1	13.52	9.38	101	73	9	5.5	183	551	86	21	20.95	63.28	86.02
female	3.9167	1	1	infectious Mononucleosis	cytomegalovirus	25	3	8	1	1	0	1	1	1	21.79	14.24	165	147	25.2	6.3	278	549	73	19
female	2.9167	1	1	infectious Mononucleosis	cytomegalovirus/Parvovirus	51	4	7	1	1	1	1	0	0	34.73	26.95	180	155	17.2	7.2	625	599	25	12	10.39	78.82	90.77
male	5.25	1	1	infectious Mononucleosis	cytomegalovirus	28	8	5	1	1	1	1	1	0	15.59	10.19	19	24	8.9	6.7	183	382	30	26
male	2.75		1	infectious Mononucleosis	Mycoplasma/cytomegalovirus	7	8	3	1	1	1	1	1	0	19.48	11.78	133	108	7.1	4.3	491	463	61	21
female	9.6667		1	infectious Mononucleosis		few	0	8	0	1	1	1	0	1	9.04	6.51	18	30	6.9	5.3	158	425	78	57
male	1.9331	1	1	infectious Mononucleosis	Parvovirus	30	1	4	1	1	1	1	0	1	33.79	22.92	54	79	6.1	3.7	223	904	103	71
female	11.25		1	infectious Mononucleosis	Mycoplasma		5	7	1	1	1	0	0	1	16.14	0.773	29	40	7	4.1	227	545	78	36	10.78	82.39	93.35
male	8.3333		1	infectious Mononucleosis	Mycoplasma	28	5	6	1	1	0	1	0	0	17.08	11.85	32	36	4	1.6	203	407	50	23
male	1.0888	1	1	infectious Mononucleosis	cytomegalovirus/Parvovirus	5	0	8	0	0	1	1	1	1	33.5	27.78	72	68	15.1	7.7	344	536	30	22	10.85	78.02	90.14
male	3	1	1	infectious Mononucleosis		17	4	5	1	1	1	1	1	0	8.3	4.53	48	71	8.2	5.6	184	733	106	74	16.29	55.21	72.61
female	3		1	infectious Mononucleosis	cytomegalovirus	10	11	7	1	1	1	0	0	0	8.66	4.56	18	32	4	2.4	130	449	69	33	16.21	55.07	72.98
male	2.6667	1	1	infectious Mononucleosis	Mycoplasma	few	7	8	1	1	1	1	1	0	21.62	11.6	128	118	8.4	5	189	759	58	30
male	4.0833	1	1	infectious Mononucleosis	Parvovirus	8	11	7	1	1	1	0	0	1	18.1	10.53	25	27	11.1	6.5	138	428	32	23	21.85	63.82	86.47
female	4	1	1	infectious Mononucleosis		30	4	5	1	1	1	1	0	0	18.7	13.26	215	154	9	2.4	316	488	60	24	10.7	75.61	86.67
female	3	1	1	infectious Mononucleosis	cytomegalovirus	20	0	9	0	1	1	0	1	1	20.25	14.59	42	67	6.4	4.5	130	679	64	54	16.17	72.67	89.31
female	8.25	1	1	infectious Mononucleosis	Mycoplasma/Legionella pneumophila/cytomegalovirus	25	19	12	1	1	1	1	1	1	7.19	4.22	134	124	8.1	4.4	243	347	30	19	16.67	66.56	85.51
male	9.5833	1	1	infectious Mononucleosis		16	6	5	1	1	1	1	0	0	12.88	8.37	88	42	3.6	2	187	326	62	21	13.13	59.79	74.71
female	6.0833	1	1	infectious Mononucleosis	cytomegalovirus	15	2	7	1	1	1	1	0	0	13.66	8.29	210	107	10.4	5.6	316	443	32	22	6.79	81.96	91.25
female	1.6694	1	1	infectious Mononucleosis	cytomegalovirus	15	5	9	1	1	1	1	0	1	34.23	23.22	73	63	5.4	2.6	195	499	68	33	20.08	50.98	74.39
female	8	1	1	infectious Mononucleosis	Legionella pneumophila/Mycoplasma	17	8	6	1	1	1	1	0	0	16.61	11.19	32	44	6.8	3.9	161	383	23	19	11.51	76.44	89.28
male	2.0833		1	infectious Mononucleosis		16	0	5	0	1	1	1	0	0	11.14	6.73	14	36	3.6	2.7	160	411	80	51	14.9	58.43	74.4
male	2.8333		1	infectious Mononucleosis	cytomegalovirus	17	0	5	0	1	1	1	0	1	1.59	5.92	55	51	4	2	211	449	61	28	17.43	61.03	83.77
female	2.9167		1	infectious Mononucleosis	Mycoplasma/Staphylococcus aureus	15	6	10	1	1	1	1	1	1	14.78	4.28	32	53	2.8	0.5	156	554	42	13
male	3.8333	1	1	infectious Mononucleosis		20	5	10	1	1	1	0	0	1	27.23	13.6	44	56	9.6	6.3	149	688	57	40
male	2.75		1	infectious Mononucleosis	cytomegalovirus		7	10	1	1	1	1	1	0	10.75	6.97	39	35	5.5	3.6	163	443	54	36	22.64	48.18	73.41
female	2.4167	1	1	infectious Mononucleosis	Mycoplasma/cytomegalovirus	12	3	6	1	1	1	1	1	1	25.63	13.6	47	46	7.8	5	128	454	51	22	11.21	65.29	79.3
female	11.6667		1	infectious Mononucleosis	Mycoplasma	15	10	11	1	1	0	0	0	1	6.9	4.09	17	26	4.4	2.3	144	356	67	17	29.17	55.7	88.03
male	7.9167	1	1	infectious Mononucleosis	Parvovirus	15	0	13	0	1	1	1	0	1	20.32	12.43	174	124	6.8	3.6	385	512	44	20
male	2.75	1	1	infectious Mononucleosis		20	5	8	1	1	1	1	1	1	22.62	15.4	145	87	27.3	12.2	404	731	66	39	13.08	73.77	89.54
male	8.6667	1	1	infectious Mononucleosis		7	6	8	1	1	1	1	0	1	15.27	7	16	27	8	4.7	189	360	47	24	9.01	77.46	88.87
female	9		1	infectious Mononucleosis	Parvovirus	12	2	6	1	1	1	1	1	1	10.74	7.92	157	73	15.7	9		303	20	9	17.33	65.73	86.51
female	2.0833	1	1	infectious Mononucleosis	cytomegalovirus	20	7	8	1	1	1	1	0	1	22.61	18.22	99	37				566	51	29	13.31	72.92	88.42
male	5.5	1	1	infectious Mononucleosis	cytomegalovirus/Mycoplasma	20	8	8	1	1	1	1	1	1	19.73	8.07	221	140	19.3	4.5	446	655	25	14	7.45	79.17	90.15
male	1.8498		0	infectious Mononucleosis	Mycoplasma	7	8	10	1	1	1	1	1	1	22.07	10.54	43	69	6.9	4.6	156	555	72	28
female	6.4167	1	1	infectious Mononucleosis	cytomegalovirus		14	8	1	1	1	1	1	0	12.15	6.47	54	45	3.8	1.7	226	532	42	23	11.07	79.55	93.74
male	5.1667	1	1	infectious Mononucleosis	Mycoplasma/cytomegalovirus	39	0	6	0	1	1	1	1	0	12.71	9.43	154	108	10.6	5.8	487	619	60	45	14.08	70.02	87.72
male	6.1667	1	1	infectious Mononucleosis	cytomegalovirus	51	7	6	1	1	1	1	1	0	16.96	11.88	38	45	6.3	3.1	112	516	75	22	8.95	78.75	90.95
male	5	1	1	infectious Mononucleosis	Mycoplasma/cytomegalovirus	25	6	5	1	1	1	1	0	0	11.35	8.11	172	55	6.1	3.1	166	517	35	17	20.56	63.27	88.69
male	3.75	1	1	infectious Mononucleosis	cytomegalovirus	few	1	8	1	1	1	1	1	1	11.43	6.91	26	44	5.1	2.4	137	574	70	36	17.58	65.43	84.83
male	2.25		1	infectious Mononucleosis	cytomegalovirus	few	5	4	1	1	1	1	0	0	8.16	5.28	37	45	5.2	3.5	160	554	87	26
male	3.25		1	infectious Mononucleosis		15	4	7	1	1	1	1	1	1	12.47	5.57	37	34				431		18
female	2.4167	1	1	infectious Mononucleosis		19	3	7	1	1	1	1	1	0	16.79	9.69	16	23	7.7	4.6	133	294	47	22	23.26	51.3	77.39
male	1.5466	1	1	infectious Mononucleosis		31	8	10	1	1	1	0	1	1	27.57	17.01	23	43	2.8	1.2	190			28	10.89	66.99	82.42
male	4.6667	1	1	infectious Mononucleosis		14	3	8	1	1	0	0	0	1	21.12	15.28	87	94	5.6	2.6	188	484	54	22
male	2.4167	1	1	infectious Mononucleosis	cytomegalovirus/Mycoplasma	16	6	8	1	1	1	1	1	1	13.58	8.77	180	63	5.1	2.3	245	572	50	33
male	2.1667		1	infectious Mononucleosis	cytomegalovirus	16	6	7	1	1	1	0	0	1	28.52	17.22	66	76	5.7	3.2	196	695	90	42
female	6.6667	1	1	infectious Mononucleosis		8	8	7	1	1	1	1	0	0	12.08	7.85	132	124	9.8	4.4	316	526	72	20	17.99	63.92	91.48
male	5.25	1	1	infectious Mononucleosis		a few	3	12	1	1	1	1	0	1	14.26	11.55	42	55	6.7	4.4		430	32	16	26.2	42.91	76.55
male	2.8333	1	1	infectious Mononucleosis		4	6	8	1	1	1	0	0	1	12.59	4.48	23	35	11.1	5.6	190	499	52	25	10.78	65.97	80.57
female	8.5833	1	1	infectious Mononucleosis	cytomegalovirus/Mycoplasma	35	8	5	1	1	1	1	0	1	14.76	10.31	46	48	7	3.7	208	497	38	22	8.43	74.41	88.26
female	15.5		1	infectious Mononucleosis	Mycoplasma/Parvovirus/adenovirus/Respiratory syncytial virus	15	10	10	1	1	1	0	0	0	21.09	17.84	626	656	11.8	4	277	671	21	18	8.73	78.34	90.75
female	1.205	1	1	infectious Mononucleosis	cytomegalovirus	10	8	8	1	1	1	1	0	0	27.66	19.66	20	36	4.7	2.9	199	521	62	27	13.92	65.74	81.42
female	1.8185		1	infectious Mononucleosis	cytomegalovirus	15	6	7	1	1	1	1	1	1	26.61	8.37	77	49	4.1	2.4	226	381	82	34
male	2.3333		1	infectious Mononucleosis	cytomegalovirus	12	3	10	1	1	1	0	0	1	10.85	6.94	16	39	5.1	2.6	239	431	82	31	22.31	52.92	82.37
male	5.1667	1	1	infectious Mononucleosis	cytomegalovirus/Parvovirus	20	3	7	1	1	1	1	1	0	22.57	16.78	271	260	21.6	11.5	579	833	371	93	6.73	77.78	87.79
female	3.75	1	1	infectious Mononucleosis	cytomegalovirus/Mycoplasma	25	1	6	1	1	1	1	1	1	9.21	6.51	34	44	5.5	3.2	221	469	48	17
female	4.5833	1	1	infectious Mononucleosis	cytomegalovirus/Parvovirus/Mycoplasma	10	10	12	1	1	1	1	0	0	13.71	8.26	167	131	8	4.8	155	514	63	55
female	9.75	1	1	infectious Mononucleosis		40	4	9	1	0	1	1	1	0	9.98	7.67	405	318	32.2	8.1			47	14	9.92	71.13	89.42
female	9.6667		1	infectious Mononucleosis		24	5	7	1	1	1	0	0	1	10.63	6.72	49	42	7.8	4.8	215	479	61	31
female	4.4167		1	infectious Mononucleosis		12	5	7	1	1	1	1	1	0	10.07	3.62	73	77	5.7	2.4	210	977	114	72
female	3.0833		1	infectious Mononucleosis	Mycoplasma/cytomegalovirus/Parvovirus	7	2	5	1	1	0	1	1	1	18.22	10.13	109	98	6.1	3.3	273	613	48	29
female	5.4167	1	1	infectious Mononucleosis		8	4	9	1	1	1	1	0	1	26.17	10.72	653	937	11	4.2	406	1047	51	33	7.73	82.61	93.68
male	5.25	1	1	infectious Mononucleosis	Mycoplasma/cytomegalovirus	12	3	5	1	1	1	1	1	0	25.83	18.16	142	127	7.5	4.8	280	652	51	18
female	2.6667	1	1	infectious Mononucleosis	Mycoplasma/cytomegalovirus	22	17	15	1	0	1	1	1	0	31.72	21.65	193	131	18.3	5.9	510	527	41	25	16.64	64.4	85.8
female	6.5833	1	1	infectious Mononucleosis	cytomegalovirus	40	12	11	1	1	1	1	1	0	23.78	17.48	186	136	27.1	6.2	422	706	90	38
male	5.0833		1	infectious Mononucleosis	cytomegalovirus/Parvovirus	12	9	8	1	1	1	1	1	1	28.46	19.06	177	99	14.4	7.2		684	47	33
male	4.5833	1	1	infectious Mononucleosis		15	5	3	1	1	1	0	0	0	15.31	10.04	10	29	6.2	3.8	159	412	39	30	15.96	66.36	86.12
female	6.6667		1	infectious Mononucleosis		25	5	11	1	1	1	1	1	0	15.28	10.47	284	110	21	10.8	444	611	34	21	11.36	75.99	91.81
male	4.5833	1	1	infectious Mononucleosis		50	4	6	1	1	0	0	0	1	15.29	12.12	131	105	7.1	3.4	313	522	42	17
male	1.2527	1	1	infectious Mononucleosis	cytomegalovirus	12	1	8	1	0	1	1	1	1	27.21	20.6	180	173	5.4	3.9	241	507	139	29
female	6.9167	1	1	infectious Mononucleosis	cytomegalovirus	10	10	7	1	1	1	1	1	1	11.5	8.87	124	127	8.6	4.8	321	496	41	13	6.59	78.49	93.49
male	1.9961	1	1	infectious Mononucleosis	cytomegalovirus/Parvovirus	5	10	8	1	1	1	0	0	0	27.54	17.22	454	231	2.7	1.5	328	510	62	19
male	3	1	1	infectious Mononucleosis	Mycoplasma/cytomegalovirus/Parvovirus	4	10	8	1	1	1	1	0	0	29.61	17.96	321	177	18.4	5.1	411	818	53	38
male	6.5	1	1	infectious Mononucleosis		16	5	8	1	1	1	1	1	0	10.89	6.39	63	69	16.5	11.5	172	334	68	21	14.78	68.8	90.09
female	8.25		1	infectious Mononucleosis	Mycoplasma	28	7	7	1	1	0	1	1	0	23.53	16.85	192	233	12.2	5.4	462	641	51	21	7.46	77.37	89.78
male	11.6667	1	1	infectious Mononucleosis	Mycoplasma/adenovirus/Parvovirus	10	16	13	1	1	1	1	0	0	18.68	5.83	236	101	9.5	4.4	314	435	23	17	9.95	75.96	89.56
female	2.5833		1	infectious Mononucleosis	cytomegalovirus	5	2	3	1	1	1	1	0	0	25.1	13.53	299	141	7.6	4.2	319	688	112	34
male	11.25	1	1	infectious Mononucleosis		13	5	6	1	1	1	1	1	0	15.12	10.48	280	222	27	9.4	311	757	34	21	6.26	84.64	94.35
male	7.5	1	0	infectious Mononucleosis		25	0	9	0	1	0	1	1	0	14.31	9.52	89	120	7.9	5	336	421	50	29	22.96	57.72	88.65
male	8.0833		1	infectious Mononucleosis	Mycoplasma	15	6	8	1	1	1	1	1	1	22.12	11	215	105	7.1	4.6	297	428	43	15
male	1.6546		1	infectious Mononucleosis	Mycoplasma/cytomegalovirus/Parvovirus	10	5	14	1	1	1	0	1	0	36.66	19	101	105	9.1	4.8	302	641	648	46	17.19	65.61	87.46
male	0.9715	1	1	infectious Mononucleosis	cytomegalovirus/Mycoplasma	7	6	9	1	1	1	1	1	0	29.21	14.91	71	70	5.2	3.2	217	660	71	41	18.39	62.62	85.55
male	4.5		1	infectious Mononucleosis		20	1	6	1	1	1	1	1	0	16.4	10.88	44	55	6	4.6	163	603	69	41
male	7.4167	1	1	infectious Mononucleosis		10	7	5	1	1	1	1	1	0	24.1	15.77	67	44	5	2.8	205	426	41	25	9.65	70.78	86.84
male	2.6667	1	1	infectious Mononucleosis	cytomegalovirus/Parvovirus	46	3	5	1	1	1	0	0	1	21.85	11.28	181	394	11	5.5	241	704	53	34	15.62	66.71	86.72
male	3.75		1	infectious Mononucleosis		0	1	9	1	1	1	1	1	0	21.11	16.01	75	55	9.9	6.5	203	487	50	23	21.61	64.37	88.66
female	10.5833		1	infectious Mononucleosis		41	11	9	1	1	1	1	0	0	16.13	9.18	316	246	13.8	7.2	417	584	45	33	11.02	78.4	93.14
male	4.0833	1	1	infectious Mononucleosis	cytomegalovirus/Parvovirus	28	4	6	1	1	1	0	1	1	19.25	9.5	18	34	4.9	3.1	140	455	70	28	13.7	70.32	87.81
female	3		1	infectious Mononucleosis	Mycoplasma/cytomegalovirus/Parvovirus	10	8	5	1	1	1	0	0	1	15.77	8.35	126	120	7.1	4.8	250	506	57	24	15.49	66.49	85.91
male	4.4167	1	1	infectious Mononucleosis	Mycoplasma	22	0	6	0	1	1	1	1	1	29.89	21.97	155	79	6.6	3.7	362	528	40	19	9.69	82.2	94.17
female	8.25	1	1	infectious Mononucleosis	Mycoplasma	25	9	7	1	1	1	1	1	0	17.34	9.51	76	41	8.2	5.6	248	606	51	16
female	1.8607		1	infectious Mononucleosis	Legionella pneumophila/Mycoplasma/Parvovirus	8	6	7	1	0	0	1	1	0	9.75	7.06	52	73	11	2.5		444	20	3	36.08	41.57	81.38
male	4	1	1	infectious Mononucleosis	Parvovirus/cytomegalovirus	11	7	5	1	1	1	1	0	1	11.92	7.17	156	96	13.3	4.2	387	642	54	24	8.7	75.53	86.93
female	4		1	infectious Mononucleosis	Mycoplasma/adenovirus/Parvovirus	12	11	12	1	1	0	1	1	0	29.19	14.96	21	36	7.1	5.7	89	563	46	32	11.53	76.65	90.03
female	4	1	1	infectious Mononucleosis	Mycoplasma/cytomegalovirus	20	14	9	1	1	1	1	1	1	13.12	8.67	292	392	14.4	5.9	809	1254	73	33	17.95	72.74	94.57
male	3.8333		1	infectious Mononucleosis	Mycoplasma/adenovirus/Parvovirus	19	9	7	1	0	1	1	1	1	28.93	16.18	117	102	15.6	7.5	318	752	64	49	10.45	71.6	87.18
male	7.0833	1	1	infectious Mononucleosis		17	7	5	1	1	1	1	1	0	8.08	4.73	225	192	11.9	8.7	322	1057	135	111	14.9	71.88	90.48
male	2.8333		1	infectious Mononucleosis	cytomegalovirus	8	0	6	0	1	1	1	0	1	17.52	10.07	67	51	7.6	4.6	371	640	61	31	12.47	73.5	89.78
male	1.7406	1	1	infectious Mononucleosis	cytomegalovirus	10	6	12	1	1	1	0	0	1	51.83	31.27	443	209	9.4	6.4	323	744	112	92	11.78	71.93	88
male	3.3333	1	1	infectious Mononucleosis	ParvovirusB19	48	13	7	1	1	1	1	1	1	31.98	18.6	45	66	8.2	4.8	186	637	57	32	6.88	76.6	87.29
male	5.25	1	1	infectious Mononucleosis		8	5	5	1	1	0	1	0	1	12.11	8.04	118	59	9	5.5	337	473	65	22	14.38	58.24	82.49
female	6.0833		1	infectious Mononucleosis	Mycoplasma	8	15	7	1	1	1	0	0	0	16.46	9.44	188	96	8.3	5.1	294	558	50	37	14.02	69.88	88.56
female	5.3333	1	1	infectious Mononucleosis		18	4	6	1	1	1	0	0	0	11.56	7.94	24	33	6.4	4	110	450	29	20	21.34	66.15	89.38
female	5.75	1	1	infectious Mononucleosis	Mycoplasma/cytomegalovirus	21	7	8	1	1	1	1	0	0	14.58	11.85	86	72	7.8	4.4	209	508	38	23	8.64	82.81	94.22
male	3.5833	1	1	infectious Mononucleosis	cytomegalovirus	25	6	6	1	1	1	1	1	0	15.76	10.52	23	45	6	3.4	140	567	82	28	12.28	62.96	81.17
female	7.4167		1	infectious Mononucleosis	Mycoplasma	19	8	11	1	1	1	1	0	1	16.87	10.37	280	217	9.8	4.6	363	530	64	31
female	4.5		1	infectious Mononucleosis		10	3	6	1	1	1	0	0	0	15	8.81	77	69	6.2	3.8	218	710	78	63	12	72.57	87.68
female	7.6667		1	infectious Mononucleosis	Parvovirus	20	10	9	1	1	1	0	1	0	24.13	19.23	44	61	8.8	4.7	173	623	31	26
male	2.5833	1	1	infectious Mononucleosis		18	5	6	1	1	1	1	1	1	12.81	8.18	9	23	7.6	4.3	171	372	33	20
male	1.4961	1	1	infectious Mononucleosis	Mycoplasma/cytomegalovirus	8	9	8	1	1	1	1	0	0	11.91	5.29	9	35	5.8	3.5	125	559	26	12
male	4	1	1	infectious Mononucleosis	Mycoplasma	8	7	6	1	1	1	1	1	0	23.79	16.24	118	77	5.2	3	224	491	66	32	11.51	78.96	92.74
male	7.4167		1	infectious Mononucleosis	Mycoplasma	few	12	10	1	1	1	1	1	1	12.67	6.09	217	96	7	4.1	285	470	41	21	9.36	68.19	84.1
male	3.5	1	1	infectious Mononucleosis	cytomegalovirus/Mycoplasma	18	11	6	1	1	1	1	1	0	16.81	10.17	47	34	6.3	3.3	141	487	43	25	8.98	78.05	88.38
male	2		1	infectious Mononucleosis		14	5	6	1	1	1	0	0	1	13.83	7.57	16	36	8	4.5	200	379	48	20
male	2.0833		1	infectious Mononucleosis	Mycoplasma	8	7	7	1	1	1	1	1	0	31.35	14.57	46	66	5.2	3.3	108	633	43	36	9.67	74.03	86.95
male	7.75	1	1	infectious Mononucleosis	Mycoplasma	8	8	6	1	1	1	0	0	0	17.82	7.44	25	69	7.7	4.4	129	995	132	113	16.23	64.91	85.12
male	2.6667		1	infectious Mononucleosis	cytomegalovirus	22	8	6	1	1	1	1	1	0	19.17	14.76	20	47	5.5	4	200	621	56	41	16.06	68.22	90.14
female	2.5833	1	1	infectious Mononucleosis	Mycoplasma/cytomegalovirus	18	4	7	1	1	1	0	0	1	18.07	9.87	529	309	7.5	4.9	175	702	52	34	12.08	72.54	87.19
male	4.0833	1	1	infectious Mononucleosis	cytomegalovirus/Mycoplasma	few	0	12	0	1	1	1	1	0	26.96	17.99	91	59	12.3	4.7		558	20	11	13.1	73.23	90.2
female	7		1	infectious Mononucleosis	cytomegalovirus	25	3	7	1	1	1	0	0	1	9.86	5.55	66	69	9.1	4.8	289	515	50	19
male	1.813	1	1	infectious Mononucleosis	cytomegalovirus	37	11	11	1	1	1	1	1	0	25.05	14.18	18	68	8.1	6.8	174	1029	114	101	17.42	69.69	90.7
female	7.0833	1	1	infectious Mononucleosis	cytomegalovirus/Mycoplasma/Parvovirus	15	10	8	1	1	1	0	1	0	18.78	10.41	169	90	14.6	6.8	241	588	30	22	7.4	78.55	91.08
female	2.9167		1	infectious Mononucleosis	cytomegalovirus/Mycoplasma/Influenza B virus	10	13	12	1	1	1	1	0	1	9.09	4.33	73	98	7.4	5.3	254	684	61	43
female	8.75	1	1	infectious Mononucleosis	Mycoplasma/cytomegalovirus	13	12	6	1	1	1	0	0	0	14.69	9.78	143	118	7.5	4.6	351	531	27	17	10.65	81.25	94.53
female	7.8333	1	1	infectious Mononucleosis	cytomegalovirus/Mycoplasma	21	5	9	1	1	1	1	1	0	22.59	17.03	98	62	11.5	6.6	202	510	30	17	7.44	78.61	94.81
female	0.8322	1	1	infectious Mononucleosis	cytomegalovirus	11	2	11	1	1	0	1	0	0	34.26	25.39	131	162	7.5	0.6	179	562	39	34
female	5.5833	1	1	infectious Mononucleosis	Mycoplasma	few	5	9	1	1	1	1	1	1	16.49	4.78	18	46	6.7	3.3	173	604	47	23	11.7	77.98	92.49
female	0.5943	1	1	infectious Mononucleosis	Parvovirus	24	4	7	1	0	0	1	1	0	44.83	30.6	59	40	4.9	2.9	161	526	43	27	19.21	62.81	84.25
female	2.75		1	infectious Mononucleosis	Mycoplasma/	17	11	9	1	1	1	1	1	1	25.83	20.76	209	131	9.9	4	644	729	64	32	9.92	76.14	88.27
female	1.8854		1	infectious Mononucleosis	cytomegalovirus	16	5	5	1	1	1	1	1	0	17.5	10.94	60	108	6.5	5.1	195	906	110	97	14.8	68.71	86.17
male	3.1667	1	1	infectious Mononucleosis		30	6	6	1	1	0	0	1	0	8.37	4.58	268	362	6.4	3.3	313	760	86	43	4.36	76.81	86.89
female	5.1667		1	infectious Mononucleosis		18	0	7	0	1	1	1	1	1	11.15	7.32	117	70	12.1	6.7	302	541	103	24
female	3.0833	1	1	infectious Mononucleosis		18	5	3	1	1	1	1	0	0	11.58	6.64	25	36	9	6.5	213	434	57	24
male	4.8333		1	infectious Mononucleosis	Mycoplasma	28	10	8	1	1	1	1	0	1	30.77	19.8	205	153	10.1	5.2	333	662	48	27	5.51	83.23	92.22
male	1.6244	1	1	infectious Mononucleosis	cytomegalovirus	19	13	9	1	1	0	0	0	1	18.38	7.3	40	74	8.9	6.5	163	951	77	66
male	1.8498	1	1	infectious Mononucleosis	Mycoplasma	25	5	3	1	1	1	0	0	0	10.64	5.85	19	35	5.2	3.2	253	414	65	23	16.06	48.18	75.44
male	4.8333		1	infectious Mononucleosis	cytomegalovirus/Mycoplasma/Influenza B virus/ParvovirusB19	16	6	8	1	1	1	1	1	0	24.3	16.54	62	65						41	6.14	74.8	86.25
male	5.75	1	1	infectious Mononucleosis	Mycoplasma	30	12	11	1	1	1	1	1	0	31.24	16.46	55	45	4.2	2.7	222	522	45	36
male	5.5	1	1	infectious Mononucleosis		20	21	7	1	1	1	1	1	0	23.49	13.94	15	29	7.6	4.6	142	74	24	20	17.83	73.25	93.46
male	2.3333	1	1	infectious Mononucleosis	cytomegalovirus/ParvovirusB19/Mycoplasma	28	10	6	1	0	1	1	1	0	21.6	15.49	45	45	5.8	4.3	225	518	40	37	9.98	75.4	89.98
male	2.25	1	1	infectious Mononucleosis		38	6	5	1	1	1	0	0	0	21.06	15.36	9	25	5.4	3.4	194			27	13.11	61.54	84.49
male	5.9167	1	1	infectious Mononucleosis		10	7	8	1	1	1	0	0	0	11.48	4	32	43	11.6	6.6	149	486	53	23
female	1.6804		1	infectious Mononucleosis	Mycoplasma/cytomegalovirus	12	7	10	1	1	1	1	0	0	17	9.06	42	94	6.8	6	198	1091	138	120
female	1.1694		1	infectious Mononucleosis		10	8	7	1	0	1	1	1	0	5.27	4.27	36	30				419	49	45
female	2.4167	1	1	infectious Mononucleosis	Mycoplasma	44	5	4	1	1	1	1	0	0	18.72	12.75	39	55	6.3	3.7	187	470	60	37	14.51	60.08	84.05
male	1.3075	1	1	infectious Mononucleosis	cytomegalovirus/Parvovirus	12	7	6	1	1	1	1	0	0	13.25	10.93	85	111	6	4.3	139	676	66	56	24.76	56.12	83.84
female	15.1667	1	1	infectious Mononucleosis	Mycoplasma	15	6	6	1	1	1	1	0	0	15.85	10.72	70	51	11.2	5.6	198	607	80	21	10	76.06	92.53
male	3.75		1	infectious Mononucleosis		few	5	3	1	1	1	1	1	0	11.28	6.45	57	54	7	5.3	159	657	70	55	20.74	57.23	82.26
male	2.0833		1	infectious Mononucleosis	Mycoplasma	12	5	3	1	0	1	1	0	0	21.54	11.99	20	51	5.8	3.4	209	544	76	37
male	3.4167		1	infectious Mononucleosis	cytomegalovirus/Mycoplasma/Parvovirus	35	6	11	1	1	1	1	0	0	17.38	9.13	15	41	7.9	5.4	161	617	94	57	11.9	68.96	84.6
female	0.8443		1	infectious Mononucleosis	cytomegalovirus/Mycoplasma	7	3	5	1	1	1	1	0	0	34.52	22.28	27	48	5.9	3.6	174	506	41	33
male	2.25	1	1	infectious Mononucleosis		20	6	6	1	1	1	0	0	1	16.16	8.6	77	109	9.8	6.5	269	836	84	62	7.82	77.29	87.88
female	3.3333	1	1	infectious Mononucleosis	Mycoplasma	15	11	6	1	1	1	1	1	0	21.31	17.29	323	171	14.8	6.3	638	735	79	41	9.33	78.77	92.33
male	3.0833	1	1	infectious Mononucleosis		10	6	6	1	1	1	1	0	1	13.13	5.82	94	57	7.1	4.7	168	676	72	65	19.81	62.32	88.46
male	5		1	infectious Mononucleosis	cytomegalovirus	25	7	6	1	1	1	0	0	0	18.41	8.62	9	49	5.4	4.2	168	690	38	68
male	6.4167	1	1	infectious Mononucleosis	cytomegalovirus	15	10	8	1	1	1	1	1	0	17.15	13.6	50	57	5.9	4.2	186	765	89	44	11.47	69.04	88.04
male	2.75	1	1	infectious Mononucleosis	Mycoplasma/cytomegalovirus	15	7	6	1	1	1	1	0	0	7.62	4.45	20	26	5.6	3.4	120	468	29	25	21.46	61.23	87.32
male	9.5	1	1	infectious Mononucleosis	Mycoplasma	13	0	5	0	1	1	1	1	1	14.73	9.15	119	121	9.6	5.3	294	471	37	15	6.01	73.91	89.48
female	8.0833	1	1	infectious Mononucleosis	Mycoplasma	16	14	6	1	1	1	1	1	1	15.59	10.38	249	185	9.6	5.3	282	655	38	23	10.35	78.28	93.68
male	2.3333		1	infectious Mononucleosis		8	9	9	1	1	1	1	0	1	12.13	7.96	79	64	5.4	2.9	276	576	59	34	11.57	55.57	73.41
male	9.1667	1	1	infectious Mononucleosis	cytomegalovirus/Parvovirus/Mycoplasma	20	11	6	1	1	1	1	1	1	21.03	11.26	57	50	8.6	4.7	183	498	43	24	12.26	69.26	88.97
female	2.25		1	infectious Mononucleosis		14	9	6	1	1	1	0	1	0	14.76	7.11	59	59	6.2	3.7	220	655	256	25	11.53	74.25	88.55
male	5.0833	1	1	infectious Mononucleosis	Mycoplasma	20	8	5	1	1	1	0	0	0	12.77	5.61	44	34	10	6.7	92	517	37	29	12.63	69.76	86.37
male	1.5	1	1	infectious Mononucleosis	Mycoplasma	12	8	9	1	1	1	0	0	0	35.85	22.66	17	54	5.4	3.9	205	768	99	87
male	3	1	1	infectious Mononucleosis	cytomegalovirus/Mycoplasma	11	6	5	1	1	1	1	0	0	17.97	10.6	31	38	7	4.5	123	433	49	31	11.33	70.51	88.64
female	8.75		1	infectious Mononucleosis	cytomegalovirus/Mycoplasma/Parvovirus	9	5	6	1	1	1	1	1	1	8.77	5.8	23	35	7.5	4.6	153	525	51	25	15.4	65.55	83.7
male	3.5		1	infectious Mononucleosis		8	6	11	1	1	1	0	0	0	11.22	6.32	12	25	5.8	3.8	168	305	56	21
male	12.9167	1	1	infectious Mononucleosis	Parvovirus	20	5	7	1	1	1	1	0	0	16.65	11.35	267	194	9.9	5.8	237	586	125	23
male	3.1667		1	infectious Mononucleosis	Mycoplasma	20	5	8	1	1	0	1	0	0	42.74	26.51	21	38	6.5	3.9	162	495	59	23
female	5.3333	1	1	infectious Mononucleosis	Mycoplasma	15	8	13	1	1	1	0	0	1	17.58	12.06	65	135	6.2	4.7	195	730	87	64	9.03	79.63	93.32
male	5.4167	1	1	infectious Mononucleosis	cytomegalovirus/Mycoplasma	20	7	6	1	1	1	1	1	1	12.43	5.83	114	97	7.1	6	375	1193	108	94	13.53	75.46	90.76
male	6.75	1	1	infectious Mononucleosis	Mycoplasma/Parvovirus	12	9	5	1	1	1	1	0	0	12.34	2.06	25	55	4.8	4.8	108	616	78	55	13.54	61.19	85.08
male	9.0833	1	1	infectious Mononucleosis	Mycoplasma	10	13	10	1	1	1	1	1	0	18.87	10.29	103	120	7.4	5.6	158	633	74	57
female	3.1667		1	infectious Mononucleosis	Mycoplasma	20	5	6	1	1	1	1	1	0	11.64	8.56	177	147	8.9	4.9	431	557	42	27	10.61	66.61	85.29
female	8.3333	1	1	infectious Mononucleosis	Mycoplasma/Parvovirus/cytomegalovirus	20	3	6	1	1	1	1	1	0	17.45	11.49	117	79	9.4	5.1	390	589	94	13	11.05	73.16	91.31
male	5.3333	1	1	infectious Mononucleosis		20	7	7	1	1	1	1	1	1	18.29	9.07	105	58	8	5.1	272	590	58	27	9.82	78.78	90.31
male	2.1667		1	infectious Mononucleosis	cytomegalovirus	6	4	8	1	1	1	0	1	0	14.86	8.34	12	29	5.5	4.2	186	387	75	20
female	1.1776	1	1	infectious Mononucleosis	Mycoplasma/cytomegalovirus	20	2	9	1	1	1	1	0	1	47.9	18.18	70	64	7.4	5.4	213	890	101	46	7.17	75.06	83.8
male	6.25	1	1	infectious Mononucleosis		30	6	7	1	1	1	1	1	1	16.2	8.19	57	48	8.3	5.2	133			42	9.08	76.48	87.24
female	2.9167	1	1	infectious Mononucleosis	cytomegalovirus/Parvovirus	50	5	6	1	1	1	1	1	1	28.93	14.99	96	145	6.2	4.1	156	803	87	75	12.51	72.78	89.13
female	4.5833	1	1	infectious Mononucleosis	Mycoplasma	20	5	7	1	1	1	1	1	0	14.99	9.91	482	234	9.7	4.8	430	665	37	22
female	4.3333	1	1	infectious Mononucleosis		18	2	8	1	1	1	1	1	0	8.99	6.07	167	59	9.9	4		306	55	14	8.7	80.83	91.61
female	7.0833		1	infectious Mononucleosis	cytomegalovirus/Mycoplasma	11	9	12	1	1	1	0	0	1	10.72	5.75	25	41	9.9	6.4	165	579	72	26	14.38	75.56	93.72
male	6	1	1	infectious Mononucleosis	Parvovirus	20	4	6	1	1	1	0	0	0	24.54	7.72	24	43	7	5.4	195	565	37	30	3.48	83.9	90.58
male	0.9632	1	1	infectious Mononucleosis		10	5	7	1	1	1	1	1	1	29.89	13.35	25	41	5.2	3.2	144	446	41	33	20.63	59.67	86.43
female	1.4413		1	infectious Mononucleosis		16	13	5	1	1	1	0	0	0	22.71	14.95	193	70	6.1	4.6	204	669	64	62	27.42	52.64	85.29
male	3.0833		1	infectious Mononucleosis	cytomegalovirus	32	3	9	1	1	1	1	0	1	11.74	6.7	18	36						45	8.9	74.3	87.91
male	3	1	1	infectious Mononucleosis		28	6	7	1	1	1	1	1	1	22.61	15.07	18	38	9.7	5.1	90	518	29	22	9.06	73.39	87.73
male	2.0833		1	infectious Mononucleosis		10		1	1	1	1	1	0	0		15.65	41	50						25
male	4.0833		1	infectious Mononucleosis	Mycoplasma	few	10	4	1	1	1	1	1	1	10.14	5.18	52	116	5	3.2	232	720	102	21
female	1.3909	1	1	infectious Mononucleosis		10	4	5	1	1	1	0	0	0	20.46	7.62	137	60	6.1	4.1	207	593	32	17	24	57.22	86.29
female	6.25	1	1	infectious Mononucleosis		18	4	5	1	1	1	0	0	0	12.88	7.48	28	31	6.4	4.2	140	410	42	18	12.4	67.61	84.34
male	5.4167	1	1	infectious Mononucleosis	Mycoplasma	20	4	9	1	1	1	1	1	1	27.95	13.56	113	122	9.2	6	172	1130	146	142	6.6	74.46	83.39
male	4.75	1	1	infectious Mononucleosis	Mycoplasma	10	2	7	1	1	1	1	1	0	15.74	5.98	289	428	8.4	4.9	266	638	61	22	8.13	69.8	82.32
female	5.4167	1	1	infectious Mononucleosis		2	0	5	0	1	1	1	0	0	10.36	6.38	24	28	7	4.1	171	441	48	35
female	2.5		1	infectious Mononucleosis		20	0	11	0	1	0	1	0	1	13.42	9.24	602	664	11.2	7.7	348	798	154	50	12.96	66.83	86.32
female	2.8333		1	infectious Mononucleosis		10	3	6	1	1	1	1	0	0	9.31	6.65	357	204						38	7.17	66.84	76.37
female	2.75	1	1	infectious Mononucleosis		17	3	4	1	1	1	0	1	0	17.04	9.99	11	44	7.4	5.5	170	650	71	53	9.79	66.42	80.03
male	4.25	1	1	infectious Mononucleosis		20	11	11	1	1	1	1	0	0	45.93	25.39	143	115	7.6	4.8	220	775	113	28
female	2.0833	1	1	infectious Mononucleosis	cytomegalovirus	20	0	3	0	1	1	1	0	0	33.29	25.6	67	82	8	5.3	222	1067	168	148	19.7	58.77	81.68
female	5		1	infectious Mononucleosis			5	10	1	1	0	1	0	1	19.63	11.24	182	129	8.4	5.2	181	660	68	22
male	3.3333		1	infectious Mononucleosis	Mycoplasma		4	8	1	1	1	0	0	0	9.66	4.99	23	44	7	4.6	198	351	40	14
female	9.5	1	1	infectious Mononucleosis	cytomegalovirus/Mycoplasma	10	1	8	1	1	1	0	1	0	17.32	9.61	153	95	9.3	5.4	352	684	68	13	7.91	78.83	91.28
female	2.75		1	infectious Mononucleosis			6	5	1	1	1	0	0	0	15.21	10.42	242	261	12.6	8.4	227	591	79	43	14.79	58.51	78.09
male	2.5	1	1	infectious Mononucleosis	cytomegalovirus	14	5	6	1	1	1	1	0	0	14.19	7.33	32	48	8	63	106	608	65	43	11.87	68.32	85.89
female	2.5	1	1	infectious Mononucleosis	cytomegalovirus/Mycoplasma	few	3	5	1	1	1	1	1	1	33.9	21.66	156	89	9.4	4.9	390	541	40	36	11.36	66.56	84.79
male	2.1667	1	1	infectious Mononucleosis	Mycoplasma	10	3	7	1	1	1	0	0	0	14.6	5.29	17	30	8.5	5.7	192	389	69	21
male	9.1667	1	1	infectious Mononucleosis	Mycoplasma	10	6	7	1	1	1	1	1	0	11.75	9.55	67	62	11	5.1	203	854	76	21
female	2.0833	1	1	infectious Mononucleosis	Mycoplasma	12	12	6	1	1	0	1	1	0	16.76	10.35	100	122	6.8	2	382	444	26	19	22.43	64.02	90.44
male	6.3333	1	1	infectious Mononucleosis	Mycoplasma	13	11	6	1	1	1	1	0	0	16.12	8.45	16	40	7.3	5.4	144	490	80	30	21.88	58.95	83.2
male	2.75		1	infectious Mononucleosis	Escherichia coli	12	7	9	1	1	1	0	0	1	18.17	8.04	67	60	6.9	4.1	220	487	53	27	9.22	63.58	81.45
male	2.3333	1	1	infectious Mononucleosis	cytomegalovirus	few	0	3	0	1	1	1	1	1	12.68	7.12	21	39	5.1	2.6	162	506	87	22
male	4.25	2	0	infectious Mononucleosis	cytomegalovirus/Parvovirus	13	1	4	1	1	1	1	1	0	12.99	3.41	23	50	5.2	3	160	382	73	22	18.25	65.26	87.47
female	3.0833	1	1	infectious Mononucleosis		few	7	7	1	1	1	1	0	0	10.93	6.34	196	161	8.2	4.1	372	666	50	27	17.12	70.57	91.08
male	3.4167	1	1	infectious Mononucleosis		25	2	2	1	1	1	1	0	0	16.14	10.32	49	35	3.4	2	208	404	46	26
male	1.858	1	1	infectious Mononucleosis	cytomegalovirus/Mycoplasma		6	7	1	1	1	1	0	1	14.94	5.01	12	24	4.9	2.5	195	448	45	26
female	5.9167	1	1	infectious Mononucleosis	Mycoplasma		4	5	1	1	1	0	0	0	14	8.33	52	67	3.8	1.6	88	452	57	19
female	2.1667		1	infectious Mononucleosis	cytomegalovirus	few	4	11	1	1	1	1	1	0	23.58	9.05	19	35	5.6	3	174	506	67	28
male	1.8158		1	infectious Mononucleosis	cytomegalovirus	few	13	7	1	1	1	1	0	0	25.42	7.67	39	65	1.4	0.2	151	659	72	68	14.57	62.09	77.74
male	7.5833	1	1	infectious Mononucleosis	Mycoplasma/Parvovirus		9	11	1	1	1	1	1	0	9.51	5.78	72	57	5.4	3.1	188	398	344	23	10.88	71.62	90.31
female	3.3333		1	infectious Mononucleosis	cytomegalovirus/Parvovirus	6	4	7	1	1	1	1	0	1	23.58	12.09	132	108	7.2	3.2	168	909	118	102	10.48	73	89.9
female	4.4167		1	infectious Mononucleosis	Mycoplasma/Parvovirus		4	8	1	1	1	1	1	0	23.34	16.12	25	42	5.3	3.2	158	569	87	65
female	4.5833	1	1	infectious Mononucleosis			10	5	1	1	1	1	1	0	8.56	6.12	121	57	5	0.7	403	462	32	11	15.62	71.63	90.41
female	6	1	1	infectious Mononucleosis		30	5	4	1	1	1	0	0	0	8.64	5.01	267	207	55.3	18.3	650	678	53	35	17.75	59.91	86.96
male	8.9167	1	1	infectious Mononucleosis		19	4	8	1	1	1	0	0	1	26.13	10.51	112	168	12.3	4.2		699	106	10	11.12	77.25	88.9
female	2.4167		1	infectious Mononucleosis	Mycoplasma/cytomegalovirus	5	6	9	1	1	1	1	0	0	18.42	6.76	60	70	5.1	2.2	217	605	58	28
female	2.3333	1	1	infectious Mononucleosis	cytomegalovirus	few	8	7	1	1	1	0	0	1	11.49	7.39	51	70	7.3	4.9	118	377	63	47	28.68	39.37	76.33
male	4.6667	1	1	infectious Mononucleosis		5	9	9	1	1	1	0	1	1	10.57	4.8	87	93	1.5	0.2	211	490	80	37	17.56	51.09	77.36
male	3.5	1	1	infectious Mononucleosis	Mycoplasma	15	3	6	1	1	1	0	0	1	19.72	6.59	65	83	5.3	3	259	491	57	50	13.01	59.6	78.49
male	4.25	1	1	infectious Mononucleosis	Parvovirus/Mycoplasma	15	4	9	1	1	1	1	0	0	20.63	7.9	30	30	10.1	3.4		409	27	13
female	8.3333	1	1	infectious Mononucleosis		28	4	7	1	1	1	1	0	0	13.48	8.13	78	61	8	4.5	188	396	27	10
male	3.75	1	1	infectious Mononucleosis	cytomegalovirus	10	7	5	1	1	1	0	0	0	15.02	11.28	19	40	4.6	2.5	151	409	33	20	21.02	64	88.78
male	1.2582	1	1	infectious Mononucleosis	staphylococcus	8	6	7	1	1	1	0	0	0	28.16	15.37	22	50	4.6	2.6	134	620	53	44
male	10.1667	1	1	infectious Mononucleosis		20	6	13	1	0	1	0	1	0	11.96	9.18	85	106	7.8	4.1	174	529	73	14	4.7	79.53	89.9
female	9.25	1	1	infectious Mononucleosis		10	6	11	1	1	1	1	0	1	10.44	6.59	247	193	5.9	3.1	280	573	70	27	4.9	83.57	92.54
female	11.25	1	1	infectious Mononucleosis	cytomegalovirus/Mycoplasma	14	8	7	1	1	1	1	1	0	18.7	9.02	385	306	25.3	6.7	391	550	48	16	4.74	86.53	93.45
male	4.5		1	infectious Mononucleosis	Mycoplasma								1	1	12.18	4.94	9	34	10.2	#REF!	195	480	155	35
male	2.75	1	1	infectious Mononucleosis	cytomegalovirus	9	1	11	1	1	1	1	1	0	36.07	13.84	87	73	5.4	#REF!	305	632	58	28	7.92	79.5	90.58
female	3.9167		1	infectious Mononucleosis	cytomegalovirus	10	2	10	1	0	0	1	1	0	28.19	21.69	150	71	10.8	#REF!	409	759	103	41	14.36	69.09	86.42
male	4.5		1	infectious Mononucleosis	cytomegalovirus/Parvovirus	few	2	7	1	1	1	0	0	0	8.02	5.31	102	64	8.2	#REF!	181	474	66	18
male	4.5833	1	1	infectious Mononucleosis		6	11	9	1	1	1	1	1	0	12.96	5.02	38	34	6.7	#REF!	247	451	41	23	10.79	68.84	86.67
male	5.9167		1	infectious Mononucleosis	Parvovirus/Mycoplasma	6	15	11	1	1	1	0	0	0	23.38	17.69	121	56	12.4	#REF!	394	495	50	16	12.2	67.74	89.66
female	4.9167		1	infectious Mononucleosis	cytomegalovirus	8	7	10	1	1	1	1	1	1	15.81	12.51	30	40	9.5	#REF!	257	512	63	15
female	2.8333	1	1	infectious Mononucleosis			3	6	1	1	1	0	0	0	28.24	16.39	27	59	7.5	#REF!	175	571	43	25	12.98	66.84	83.64
male	3.8333	1	1	infectious Mononucleosis	cytomegalovirus/Parvovirus/Mycoplasma	0	5	6	1	1	1	1	0	0	16.37	6.91	12	25	6.4	#REF!	173	292	46	24	10.18	64.42	82.15
male	1.6546	1	1	infectious Mononucleosis	Mycoplasma	5	4	6	1	1	1	1	0	0	18.38	10.84	236	93	6.1	#REF!	187	605	65	30
male	5.8333		1	infectious Mononucleosis	Mycoplasma/Parvovirus	9	3	9	1	1	0	1	1	1	21.67	13.54	42	74	7.1	#REF!	147	525	69	29	7.63	73.86	85.78
male	1.2242	1	1	infectious Mononucleosis			7	7	1	1	1	0	1	1	19.33	9.8	97	120	6.6	#REF!	73	1155	151	126	10.56	58.12	78.61
female	6.0833	1	1	infectious Mononucleosis	Mycoplasma		3	8	1	1	1	1	0	0	17.71	11.21	313	355	7.7	#REF!	224	658	63	17
female	7.5833	1	1	infectious Mononucleosis			3	5	1	1	1	1	0	0	25.31	13.85	166	63	12	#REF!	308	436	36	19	6.56	82.22	90.73
female	5.5833	1	1	infectious Mononucleosis	cytomegalovirus/Parvovirus	12	7	6	1	1	1	1	1	0	8.97	4.2	10	25	7.5	#REF!	171	412	34	12	13	68.97	87.78
male	3.0833		0	infectious Mononucleosis	cytomegalovirus	15	0	5	0	1	1	1	0	0	20.05	13.16	47	61	6.6	#REF!	147	710	89	33	16.11	67.17	88.18
male	5.8333	1	1	infectious Mononucleosis	Mycoplasma/Parvovirus	few	7	9	1	1	1	0	0	1	16.72	6.43	16	29	9.8	#REF!	126	453	40	27	18.31	64.57	88.72
male	5.5833	1	1	infectious Mononucleosis	cytomegalovirus	9	5	7	1	1	1	1	1	0	10.98	6.45	104	111	6.5	#REF!	337	495	63	28	10.35	74.41	89.77
female	2	1	1	infectious Mononucleosis	Mycoplasma/Parvovirus/cytomegalovirus	9	4	9	1	1	0	1	1	1	15.28	7.99	45	39	6.6	#REF!	185	605	35	19	12.35	68.94	86.4
male	1.3416	1	1	infectious Mononucleosis		19	7	6	1	0	1	1	0	0	73.14	50.46	201	72	6.2	#REF!	416	585	117	25
female	10.9167	1	1	infectious Mononucleosis	Parvovirus/cytomegalovirus	12	8	7	1	1	1	1	1	0	13.24	8.57	236	147	86.1	#REF!	358	755	63	21	11.12	60.29	89.71
female	1.8361		1	infectious Mononucleosis	cytomegalovirus	27	0	8	0	1	1	1	0	1	21.55	10.57	50	51	6.5	#REF!	165	574	48	17
female	8.5	1	1	infectious Mononucleosis	Mycoplasma	5	10	13	1	1	1	1	0	0	12.47	8.8	210	84	11	#REF!	332	568	65	20	9.51	68.5	87.74
male	10		1	infectious Mononucleosis		15	7	6	1	1	1	0	0	0	20.3	15.99	195	113		#REF!		463	36	14
female	7.8333	1	1	infectious Mononucleosis			10	6	1	1	1	0	0	1	11.5	6.42	163	68	8.6	#REF!	288	398	24	11	13.91	70.63	85.96
male	0.91		1	infectious Mononucleosis	Mycoplasma	6	2	14	1	1	1	0	1	0	22.89	11.89	78	113	9.8	#REF!	199	441	67	38
male	3.25	1	1	infectious Mononucleosis		8	4	8	1	1	1	0	0	1	8.87	4.77	20	29	8.3	#REF!	159	385	111	36
male	3.5		0	infectious Mononucleosis	Mycoplasma	6	0	6	0	1	1	1	0	1	10.84	7.14	62	45	4.1	#REF!	302	472	69	29
male	2.6667	1	1	infectious Mononucleosis	cytomegalovirus	8			1	1	0	1	0	0		10.72	90	65		#REF!				51
male	3.5		1	infectious Mononucleosis	cytomegalovirus	12			1	1	1	1	1	1		14.5	407	564		#REF!				137
male	1.9128	1	1	infectious Mononucleosis		few			1	1	1	1	1	0		9.61	88	72		#REF!				95
female	4.0833	1	1	infectious Mononucleosis	Mycoplasma/cytomegalovirus	few			1	1	1	1	0	0		14.97	304	210		#REF!				28
female	3.8333	1	1	infectious Mononucleosis	cytomegalovirus	15			1	1	1	1	1	1		8.42	79	47		#REF!				27
male	1.5027	1	1	infectious Mononucleosis	cytomegalovirus/Enterococcus faecalis	few			1	1	1	1	1	1		12.89	21	26		#REF!				27
male	3.0833		1	infectious Mononucleosis		few			0	1	1	1	1	1		8.36	127	54		#REF!				21
male	5.5833	1	1	infectious Mononucleosis	cytomegalovirus	5			1	1	0	1	1	0		7.33	123	90		#REF!				45
female	4.0833	1	1	infectious Mononucleosis		few			1	1	1	1	1	1		6.38	338	157		#REF!				25
male	2.9167	1	1	infectious Mononucleosis		8			0	1	1	1	1	0		7.01	53	71		#REF!				126
male	12.0833	1	1	infectious Mononucleosis	Parvovirus	4			1	1	1	1	0	0		8.81	139	107		#REF!				15
female	2.0833	1	1	infectious Mononucleosis	cytomegalovirus	17			1	1	1	1	1	1		7.77	297	298		#REF!				43
male	6.25	1	1	infectious Mononucleosis		6			1	1	1	1	0	0		5.85	88	61		#REF!				32
female	5.1667	1	1	infectious Mononucleosis		few			1	1	1	1	0	1		3.45	24	30		#REF!				21
female	9.6667	1	1	infectious Mononucleosis					1	1	1	1	0	1		5.52	40	42		#REF!				57
female	4.5	1	1	infectious Mononucleosis	Mycoplasma	9			1	1	1	1	1	0		8.76	78	61		#REF!				29
female	2.0833		1	infectious Mononucleosis		8			1	1	1	0	0	0		11.81	13	31		#REF!				22
male	4.8333	1	1	infectious Mononucleosis	cytomegalovirus	14			1	1	1	1	1	0		8.65	54	73		#REF!				55
male	3.3333		1	infectious Mononucleosis					1	1	1	0	0	0		10.13	99	55		#REF!				21
female	4.0833	1	1	infectious Mononucleosis	cytomegalovirus	few			1	1	0	1	1	1		6.76	184	88		#REF!				22
male	10.3333	1	1	infectious Mononucleosis		17			1	1	1	0	0	0		10.34	283	162		#REF!				99
male	1.5861		1	infectious Mononucleosis	cytomegalovirus/Mycoplasma	18			1	1	1	0	1	0		9.96	128	78		#REF!				32
male	3.5833	1	1	infectious Mononucleosis	cytomegalovirus	5			1	1	1	1	0	0		7.05	203	68		#REF!				27
male	3.6667		1	infectious Mononucleosis	Mycoplasma	7			1	1	1	1	1	0		11.03	53	63		#REF!				42
male	4.4167	1	1	infectious Mononucleosis	Mycoplasma/Parvovirus/Influenza B virus	few			1	1	1	1	1	0		7.66	23	89		#REF!				45
female	8		1	infectious Mononucleosis	Mycoplasma	few			1	1	1	0	0	1		5.06	36	35		#REF!				24
female	9.9167	1	1	infectious Mononucleosis	Parvovirus/Mycoplasma	0			1	1	1	1	1	0		5.35	205	95		#REF!				20
male	3.5833	1	1	infectious Mononucleosis		15			1	1	1	1	0	0		6.44	166	56		#REF!				22
male	4.1667	1	1	infectious Mononucleosis	cytomegalovirus	20			1	1	1	1	1	0		20.29	61	56		#REF!				29
male	2.0833	1	1	infectious Mononucleosis	Mycoplasma	12			1	1	1	1	1	1		8.19	14	30		#REF!				43
male	2	1	1	infectious Mononucleosis	cytomegalovirus/Mycoplasma	7			1	1	1	1	1	0		6.25	18	33		#REF!				27
female	9.25	1	1	infectious Mononucleosis	Mycoplasma	10			1	1	1	1	0	0		6.33	406	275		#REF!				25
female	2.9167	1	1	infectious Mononucleosis	Mycoplasma/cytomegalovirus	13			1	1	1	1	1	0		8.05	121	76		#REF!				27
female	3.1667	1	1	infectious Mononucleosis	cytomegalovirus/Mycoplasma/Parvovirus	12			1	1	1	1	1	1		10.33	147	77		#REF!				21
male	3.25	1	1	infectious Mononucleosis	cytomegalovirus	30			1	1	1	0	0	0		12.11	21	49		#REF!				25
female	1.6409	1	1	infectious Mononucleosis	cytomegalovirus/Mycoplasma				1	1	1	0	0	0		5.43	28	61		#REF!				122
female	1.9578	1	1	infectious Mononucleosis	Mycoplasma	21			1	1	1	0	0	0		8.15	27	51		#REF!				44
female	3.1667	1	1	infectious Mononucleosis	cytomegalovirus	17			1	1	1	1	1	0		8.44	28	96		#REF!				102
male	4.25	1	0	infectious Mononucleosis	Mycoplasma/cytomegalovirus	10			1	1	1	0	0	0		5.4	26	31		#REF!				22
male	2.5833	1	1	infectious Mononucleosis	cytomegalovirus/Parvovirus	few			1	1	1	1	0	0		17.22	446	238		#REF!				19
male	2.4167		1	infectious Mononucleosis	cytomegalovirus/Mycoplasma	8			0	1	1	1	0	1		4.25	30	40						43
male	3.5833	1	1	infectious Mononucleosis	Mycoplasma	few			1	1	1	1	1	0		7.67	36	55						27
female	1.5137	1	1	infectious Mononucleosis		27			0	1	1	1	1	0		15.66	109	105						31
male	3.25	1	1	infectious Mononucleosis	cytomegalovirus	10			1	1	1	1	0	1		9.45	50	75						82
female	2.75	1	1	infectious Mononucleosis	cytomegalovirus	7			1	1	1	1	1	0		6.87	57	89						56
male	4.5833	1	1	infectious Mononucleosis		8			1	1	1	1	0	0		8.77	18	40						22
male	4.75	1	1	infectious Mononucleosis	Mycoplasma/cytomegalovirus	15			1	1	1	1	0	0		7.16	2	62						19
female	3.25	1	1	infectious Mononucleosis	cytomegalovirus/Mycoplasma	few			1	1	1	1	0	0		10.89	21	28						37
male	5.1667	1	1	infectious Mononucleosis		20			1	1	1	0	0	0		11.29	161	164						23
male	6.0833	1	1	infectious Mononucleosis	Mycoplasma				0	1	1	1	0	0		5.3	103	69						20
male	7.25	1	1	infectious Mononucleosis	cytomegalovirus	12			1	1	1	1	1	0		6.24	44	47						57
male	6.0833	1	1	infectious Mononucleosis		18			1	1	1	0	0	0		10.46	45	34						13
male	2.5833		1	infectious Mononucleosis		10			1	1	1	1	1	1		5.89	59	83						35
female	1.5712	1	1	infectious Mononucleosis	Haemophilus influenzae	few			1	1	1	1	1	1		9.35	54	70						32
female	11.6667		1	infectious Mononucleosis		10			1	1	1	0	0	0		9.71	299	156						25
female	7.8333		1	infectious Mononucleosis	cytomegalovirus/Mycoplasma	5			1	1	1	1	1	1		8.83	48	72						20
female	1.6804	1	1	infectious Mononucleosis	Mycoplasma/cytomegalovirus	16			1	1	1	1	1	0		10.89	214	107						44
female	1.1326		1	infectious Mononucleosis	cytomegalovirus	few			0	0	1	1	1	0		11.66	21	40						41
male	3.25	1	1	infectious Mononucleosis	cytomegalovirus/Parainfluenza virus	15			1	1	1	1	1	0		11.07	128	101						102
male	1.5329	1	1	infectious Mononucleosis		6			1	1	1	1	1	0		5.02	19	32						29
male	4.9167	1	1	infectious Mononucleosis		few			1	1	1	1	0	0		8.64	27	32						12
female	9.5		0	infectious Mononucleosis		6			1	1	1	1	0	1		4.62	13	36						33
male	3.1667	1	1	infectious Mononucleosis	cytomegalovirus	8			1	1	1	1	0	0		5.84	174	119						25
female	6.5	1	1	infectious Mononucleosis	cytomegalovirus	6			0	1	1	1	1	1		15	45	60						30
male	1.9495	1	1	infectious Mononucleosis	Mycoplasma/cytomegalovirus	8			1	1	1	1	1	0		9.81	94	88						13
female	9.6667	1	1	infectious Mononucleosis		26			1	1	1	1	1	0		12.89	96	129						52
male	3.9167		1	infectious Mononucleosis	cytomegalovirus	15			1	1	1	1	1	0		10.88	87	56						16
male	3.5833	1	1	infectious Mononucleosis		3			0	1	1	1	1	0		16.47	29	27						18
male	3.3333	1	1	infectious Mononucleosis	cytomegalovirus/Mycoplasma	6			1	1	1	1	1	0		16.23	98	39						17
female	2	1	1	infectious Mononucleosis	cytomegalovirus/Mycoplasma	few			1	1	1	1	0	0		16.85	269	64						41
male	1.4578	1	1	infectious Mononucleosis	Mycoplasma	18			0	1	1	1	1	1		7.54	103	87						23
female	4.4167	1	1	infectious Mononucleosis	cytomegalovirus/Mycoplasma	12			1	1	1	1	1	1		10.17	161	114						21
male	4		1	infectious Mononucleosis	cytomegalovirus/Mycoplasma	few			1	1	1	1	0	0		5.75	72	29						20
female	13.1667	1	1	infectious Mononucleosis					1	1	1	0	1	0		5.89	58	79						19
female	4.5833	1	1	infectious Mononucleosis		12			1	1	1	1	1	1		9.52	11	34						29
female	2.6667	1	1	infectious Mononucleosis	cytomegalovirus	7			1	1	1	1	1	1		8.02	8	22						18
male	4		1	infectious Mononucleosis	cytomegalovirus/Mycoplasma				1	0	1	1	0	1		4.51	167	143						35
male	1.3048	1	1	infectious Mononucleosis		13			1	1	1	1	1	0		5.85	21	29						25
male	3.6667	1	1	infectious Mononucleosis		10			1	1	1	1	1	1		22.79	82	122						31
male	1.5575	1	1	infectious Mononucleosis	cytomegalovirus/Mycoplasma	10			1	1	1	1	1	1		13.33	129	142						38
female	2.1667	1	1	infectious Mononucleosis	cytomegalovirus	15			1	1	1	1	0	1		17.67	196	93						60
female	1.3185	1	1	infectious Mononucleosis	Mycoplasma	8			1	1	1	1	1	1		19.67	64	82						27
male	5.1667		1	infectious Mononucleosis		17			1	1	1	1	1	0		8.52	76	77						42
male	0.8388	1	0	infectious Mononucleosis		10			1	1	1	1	1	0		5.92	20	41						55
female	6.8333	1	1	infectious Mononucleosis	Mycoplasma	7			1	1	1	1	1	1		13.91	577	160						27
female	3.1667	1	1	infectious Mononucleosis	Mycoplasma	5			1	0	1	1	1	1		6.75	206	131						44
female	3.6667	1	1	infectious Mononucleosis	Mycoplasma	few			1	1	1	1	0	1		21.26	40	68						55
female	1.1721		1	infectious Mononucleosis		25			1	1	1	0	0	1		17.31	44	47						38
male	1.7664		1	infectious Mononucleosis	cytomegalovirus	7			0	1	0	1	0	1		8.3	207	228						25
female	1.9358	1	1	infectious Mononucleosis	cytomegalovirus	17			1	1	1	1	1	0		10.04	13	35						52
male	2	1	1	infectious Mononucleosis		5			1	1	1	1	0	1		6.19	100	157						22
male	4		1	infectious Mononucleosis	cytomegalovirus				1	1	0	0	0	1		5.39	13	22						26
female	4.25	1	1	infectious Mononucleosis		6			1	1	1	1	0	0		6.52	22	29						44
male	3.25	1	1	infectious Mononucleosis	cytomegalovirus	few			1	0	1	1	1	1		7.28	357	397						22
female	4.1667	1	1	infectious Mononucleosis					1	1	1	1	1	0		8.03	68	96						29
female	5.3333	1	1	infectious Mononucleosis		8			1	1	1	0	0	0		5.87	49	131						160
male	8.25		1	infectious Mononucleosis		12			1	1	1	1	1	1		5.45	77	84						33
female	8.75	1	1	infectious Mononucleosis		few			1	1	1	1	0	0		12.66	39	44						26
female	4.4167	1	1	infectious Mononucleosis	Mycoplasma/cytomegalovirus	6			1	1	1	1	1	0		6.47	299	155						21
female	9.6667	1	1	infectious Mononucleosis	Mycoplasma/Parvovirus	18			1	1	1	1	1	1		9.8	135	119						112
female	5.3333	1	1	infectious Mononucleosis		20			1	0	1	1	0	0		14.19	17	49						25
male	2.25	1	1	infectious Mononucleosis	cytomegalovirus/Mycoplasma	few			0	1	1	1	0	1		4.94	70	52						19
male	3.3333	1	0	infectious Mononucleosis	cytomegalovirus/Mycoplasma				1	1	0	1	0	1		9.62	74	72						40
male	5.1667		0	infectious Mononucleosis	cytomegalovirus/Mycoplasma	7			1	1	1	1	0	1		5.28	12	28						20
male	0.2352	1	0	infectious Mononucleosis	cytomegalovirus	few			1	1	0	1	0	0		6.46	176	146						41
female	13.8333	1	1	infectious Mononucleosis	cytomegalovirus	9			1	0	1	1	1	0		7.34	756	434						19
female	2.25	1	0	infectious Mononucleosis	cytomegalovirus/Mycoplasma	8			1	1	1	1	0	0		8.29	6	29						19
female	4	1	1	infectious Mononucleosis		few			1	1	1	1	0	1		10.28	6	23						22
male	9.5	1	1	infectious Mononucleosis		12			1	1	1	0	0	0		8.78	267	137						23
female	7.4167	1	1	infectious Mononucleosis		15			1	1	1	1	1	0		6.99	457	118						33
female	4.3333	1	1	infectious Mononucleosis	cytomegalovirus/Mycoplasma	8			1	1	1	1	0	1		9.62	47	57						29
female	3.1667		1	infectious Mononucleosis	cytomegalovirus	few			1	1	1	0	0	1		12.52	63	76						28
male	3.5833	1	0	infectious Mononucleosis	Mycoplasma	few			1	1	1	0	0	0		5.51	17	30						42
female	4.75	1	1	infectious Mononucleosis	Mycoplasma	15			1	1	1	1	0	1		8.78	183	146						39
female	5.25	1	1	infectious Mononucleosis	Mycoplasma	7			1	1	1	1	0	1		7.59	29	50						28
female	1.4441		1	infectious Mononucleosis	Mycoplasma	8			1	1	1	0	0	1		12.78	97	95						20
male	4	1	0	infectious Mononucleosis	Mycoplasma	20			1	1	1	1	1	0		20.61	234	141						70
male	5.1667		1	infectious Mononucleosis	cytomegalovirus	13			0	1	1	0	0	1		6.42	40	51						65
female	6	1	1	infectious Mononucleosis	cytomegalovirus	5			0	1	1	0	0	1		10.36	87	51						16
female	3.8333	1	1	infectious Mononucleosis		25			1	1	1	0	0	1		10.29	14	27						16
male	3.0833	1	1	infectious Mononucleosis	cytomegalovirus/Mycoplasma	18			1	1	1	1	1	1		17.06	64	72						37
male	3	2	1	infectious Mononucleosis	cytomegalovirus/Parvovirus/Mycoplasma	21			1	1	0	1	0	0		0.88	1526	2169						38
female	3.9167	1	1	infectious Mononucleosis		20			0	1	1	1	1	1		5.47	26	32						33
female	3.1667	1	1	infectious Mononucleosis		9			0	1	1	1	1	0		3.93	52	41						41
male	9	1	1	infectious Mononucleosis	Mycoplasma	15			1	1	1	1	1	0		11.6	67	101						201
female	4	1	0	infectious Mononucleosis	Mycoplasma	18			1	1	1	0	0	0		6.75	58	48						12
male	6.75	1	1	infectious Mononucleosis	Mycoplasma	few			1	1	1	1	1	0		5.11	127	49						9
male	9.4167	2	1	infectious Mononucleosis		few			1	1	1	1	0	0		7.9	569	284						31
male	0.9386	1	1	infectious Mononucleosis	cytomegalovirus/Mycoplasma	6			1	1	1	1	1	1		5.55	294	200						20
male	5.8333	1	1	infectious Mononucleosis	cytomegalovirus	25			1	1	1	1	1	0		5.56	30	46						39
male	2.4167	1	1	infectious Mononucleosis		few			1	1	1	1	1	0		9.38	200	135						71
male	4.25	1	1	infectious Mononucleosis	cytomegalovirus/Mycoplasma				1	1	1	1	0	0		3.4	7	19						19
female	4.0833		1	infectious Mononucleosis					1	1	1	0	0	0		6.18	17	41						33
male	3.75	1	1	infectious Mononucleosis	Mycoplasma	15			1	1	1	1	1	1		8.46	23	40						55
male	6.5833	1	1	infectious Mononucleosis	Mycoplasma	18			1	1	1	1	1	0		13.19	256	133						36
male	2.8333	1	1	infectious Mononucleosis	Parvovirus	22			1	1	0	1	0	0		9.79	17	35						25
male	1.0822	1	1	infectious Mononucleosis	Mycoplasma	few			1	1	1	1	0	1		4.82	26	39						55
male	2.5833	1	1	infectious Mononucleosis	cytomegalovirus	15			1	1	1	1	0	0		10.59	25	38						21
male	3.8333	1	0	infectious Mononucleosis		25			1	1	1	1	0	0		22.28	546	243						36
male	4	1	0	infectious Mononucleosis	cytomegalovirus	9			1	1	1	0	0	1		12.78	46	67						26
female	4.8333	1	0	infectious Mononucleosis	Mycoplasma	15			1	1	1	1	1	0		5.95	36	42						40
female	1.8021	1	1	infectious Mononucleosis	cytomegalovirus	25			1	0	1	1	1	0		29.28	54	108						64
male	0.9441		1	infectious Mononucleosis	Mycoplasma	few			1	1	1	1	1	0		4.84	67	48						22
female	7.5	1	1	infectious Mononucleosis	Mycoplasma/Parvovirus	15			1	1	1	0	0	0		5.9	157	112						21
male	7.5	1	1	infectious Mononucleosis	Mycoplasma	10			1	1	1	0	0	0		8.29	14	29						22
female	4.5833		1	infectious Mononucleosis		few			1	1	1	0	0	1		5.45	38	44						23
male	1.4715	1	1	infectious Mononucleosis		12			1	1	1	0	0	0		12.33	107	68						44
male	0.9906		0	infectious Mononucleosis		20			1	1	1	0	0	1		8.6	113	93						110
female	4.6667	1	1	infectious Mononucleosis	Mycoplasma	14			1	1	1	1	1	1		4.01	129	92						135
female	8.9167	1	1	infectious Mononucleosis	Mycoplasma/Q thermal rickettsia	38			1	1	1	0	0	0		10.32	728	750						3
male	6.75	1	1	infectious Mononucleosis	Mycoplasma	10			1	1	1	1	1	1		10.44	119	66						19
female	3.5	1	1	infectious Mononucleosis	Mycoplasma/Parvovirus	9			1	1	1	1	0	0		3.25	20	53						92
male	1.9605	1	1	infectious Mononucleosis	Mycoplasma/cytomegalovirus	5			1	0	1	0	0	1		7.32	249	62						26
male	3.4167	1	1	infectious Mononucleosis	Mycoplasma	25			0	1	1	1	0	1		9.88	361	141						27
female	3.5833		0	infectious Mononucleosis	cytomegalovirus/Mycoplasma	12			1	1	1	1	0	1		7.57	524	316						18
female	3.5	1	0	infectious Mononucleosis	Mycoplasma	10			1	1	1	0	1	0		2.72	52	76						63
male	4.0833	1	1	infectious Mononucleosis	cytomegalovirus/Parvovirus	17			1	1	1	0	0	1		8.69	52	61						28
female	5	1	1	infectious Mononucleosis					1	0	1	1	1	1		3.76	53	78						70
female	1.5329	1	1	infectious Mononucleosis	cytomegalovirus/Mycoplasma	28			1	1	1	1	0	0		9.03	44	52						23
male	3.3333		1	infectious Mononucleosis	Mycoplasma	16			1	1	1	0	1	0		4.14	391	172						33
female	12.1667	1	1	infectious Mononucleosis	Mycoplasma	50			0	1	1	0	0	1		7.37	21	45						33
male	2.8333	1	1	infectious Mononucleosis	cytomegalovirus/Mycoplasma	28			0	1	1	1	0	1		8.41	20	41						38
male	2.1667	1	0	infectious Mononucleosis	Mycoplasma	20			1	1	1	0	0	0		12.19	39	53						23
male	2.8333	1	1	infectious Mononucleosis	Mycoplasma				1	1	1	0	0	1		12.67	20	86						206
male	7.4167	1	0	infectious Mononucleosis		28			1	1	1	0	1	0		3.12	280	58						14
male	8.6667	2	0	infectious Mononucleosis	cytomegalovirus	few			1	1	1	0	0	0		5.2	8	30						15
female	1.4468	1	1	infectious Mononucleosis	Mycoplasma	few			1	1	1	1	0	0		10.19	44	42						28
male	1.5548	1	1	infectious Mononucleosis	cytomegalovirus/Mycoplasma	10			1	1	1	1	0	1		3.51	262	130						17
female	7.1667	1	1	infectious Mononucleosis	cytomegalovirus/Mycoplasma	13			0	1	1	1	0	0		7.01	34	52						24
male	4.5	1	1	infectious Mononucleosis		20			1	1	1	1	0	0		3.58	55	72						57
female	2.5833	1	0	infectious Mononucleosis	Mycoplasma	39			0	1	1	0	1	0		10.93	234	95						56
male	2.75	1	1	infectious Mononucleosis	Mycoplasma	18			1	1	1	1	1	0		8.44	33	59						85
female	3.6667	1	1	infectious Mononucleosis		10			1	1	1	1	0	0		7.8	94	89						21
male	5.9167		1	infectious Mononucleosis		12			1	1	1	0	0	0		8.01	17	45						20
male	2	1	1	infectious Mononucleosis	cytomegalovirus/Mycoplasma	23			1	1	1	0	0	0		5.3	154	135						9
female	14.0833	1	1	infectious Mononucleosis	Mycoplasma	40			1	1	1	1	1	0		16.07	91	129						37
female	3.9167	1	1	infectious Mononucleosis		25			0	1	1	0	0	1		9.86	69	55						42
male	4.5	1	1	infectious Mononucleosis		12			1	1	1	1	1	0		3.96	193	149						18
female	9.5833	1	1	infectious Mononucleosis	Mycoplasma	25			1	1	1	0	0	1		7.04	68	83						69
female	5.4167	1	1	infectious Mononucleosis		15			1	1	1	1	0	1		4.7	23	35						28
female	2.5	1	1	infectious Mononucleosis	Mycoplasma	6			0	0	1	1	1	0		1.97	166	124						21
female	9.5	1	0	infectious Mononucleosis	cytomegalovirus	30			1	0	0	1	1	0		9.77	57	104						82
female	0.7078	1	0	infectious Mononucleosis	Mycoplasma	28			1	1	1	1	0	0		18.47	183	179						50
female	2.9167	1	1	infectious Mononucleosis	cytomegalovirus	30			1	1	1	1	0	0		7.37	24	50						69
male	7.1667	1	0	infectious Mononucleosis		18			1	1	1	0	0	1		12.26	104	92						67
female	4.3333	1	0	infectious Mononucleosis	Mycoplasma	22			0	1	1	0	1	1		10.35	26	43						29
male	5.3333	1	1	infectious Mononucleosis		18			1	1	1	0	0	1		5.26	21	55						53
male	3.5	1	1	infectious Mononucleosis	cytomegalovirus/Mycoplasma	25			0	1	1	1	1	0		8.19	139	129						38
male	8.8333		0	infectious Mononucleosis		17			1	1	1	1	1	0		8.37	123	153						31
female	2.9167	1	1	infectious Mononucleosis	Parvovirus	few			1	1	1	0	0	0		4.83	37	32						17
female	5	1	0	infectious Mononucleosis					1	1	1	1	0	0		4.29	16	20						4
female	1.205	1	1	infectious Mononucleosis		20			1	1	1	1	1	0		11.92	97	69						27
male	5.8333	1	0	infectious Mononucleosis	Mycoplasma	few			1	1	1	1	0	0		7.86	13	26						18
male	0.9769	1	0	infectious Mononucleosis					1	1	1	1	1	1		11.72	18	44						38
male	0.7719	1	1	infectious Mononucleosis		15			1	1	1	0	0	1		12.78	31	38						33
female	1.6886	1	1	infectious Mononucleosis	cytomegalovirus/Mycoplasma	13			1	1	1	0	0	1		6.45	17	32						38
male	1.8075	1	1	infectious Mononucleosis	cytomegalovirus	10			1	1	1	1	1	0		18.34	25	56						12
male	3.5	1	1	infectious Mononucleosis		12			1	1	1	1	0	1		5.37	17	52						105
male	3.5833		1	infectious Mononucleosis	cytomegalovirus/Mycoplasma	15			1	1	1	1	0	0		6.6	18	66						85
male	5.1667	1	1	infectious Mononucleosis		12			1	1	1	1	1	0		3.88	29	26						17
female	11.3333	1	0	infectious Mononucleosis	Mycoplasma	few			1	1	1	0	0	1		11.93	115	140						20
male	2.25	1	1	infectious Mononucleosis	cytomegalovirus	10			1	1	1	1	1	1		12.28	31	54						23
female	4.8333		0	infectious Mononucleosis		20			1	1	1	1	0	0		10.13	94	43						36
male	7.9167	1	1	infectious Mononucleosis					1	1	1	1	0	0		9.04	110	89						99
male	3.75	1	1	infectious Mononucleosis	Mycoplasma				1	1	1	1	0	1		6.15	74	72						24
female	7.1667		1	infectious Mononucleosis	Mycoplasma	few			0	1	1	1	0	1		5.5	96	83						19
female	5.75	1	1	infectious Mononucleosis		12			1	1	1	1	1	1		10.03	82	106						22
male	6.1667		1	infectious Mononucleosis	cytomegalovirus	10			0	1	1	1	1	0		5.03	19	61						21
female	1.4276	1	1	infectious Mononucleosis	Mycoplasma	10			1	1	1	1	0	0		6.27	46	44						6
male	9.9167	1	1	infectious Mononucleosis	Mycoplasma	18			1	1	1	0	1	0		5.37	153	91						30
female	1.8662	1	1	infectious Mononucleosis	cytomegalovirus/Parvovirus	25			1	1	1	1	1	1		14.65	30	49						15
male	9.4167	1	0	infectious Mononucleosis					1	1	1	1	1	0		7.8	22	57						34
female	2.1667	1	1	infectious Mononucleosis	cytomegalovirus/Parvovirus/Mycoplasma	15			1	1	1	1	0	1		7.97	27	41						24
male	0.9961	1	1	infectious Mononucleosis	Mycoplasma/cytomegalovirus	25			1	1	1	1	1	1		3.03	41	65						23
male	5.6667	1	0	infectious Mononucleosis	Mycoplasma/cytomegalovirus	few			1	1	1	1	0	0		5.7	12	29						23
male	1.9797	1	0	infectious Mononucleosis	Mycoplasma	30			1	1	1	1	1	0		23.23	120	150						36
male	1.3322	1	1	infectious Mononucleosis	cytomegalovirus/Parvovirus				0	1	1	0	0	1		5.73	26	65						105
male	3.0833	1	1	infectious Mononucleosis	cytomegalovirus				0	1	1	1	1	0		4.63	50	72						69
male	5.6667	1	0	infectious Mononucleosis	Mycoplasma	8			1	1	1	1	1	0		10.8	289	227						15
female	4.1667		1	infectious Mononucleosis	cytomegalovirus				1	0	1	1	1	0		5.98	10	34						26
male	0.9605	1	1	infectious Mononucleosis		20			1	1	1	1	1	0		3.56	154	123						42
male	2.6667	1	0	infectious Mononucleosis	cytomegalovirus/Mycoplasma				1	1	1	1	1	0		7.76	303	178						35
female	3.5833	1	1	infectious Mononucleosis	cytomegalovirus/Parvovirus	18			1	1	1	1	0	0		3.65	374	60						12
female	4.3333	1	1	infectious Mononucleosis	cytomegalovirus	few			0	1	1	1	1	1		6.31	393	289						17
female	5.9167	1	1	infectious Mononucleosis	cytomegalovirus/Parvovirus	9			1	1	1	0	0	0		5.56	23	33						18
male	4.25	1	1	infectious Mononucleosis	cytomegalovirus/Mycoplasma	30			1	1	1	1	1	0		7.31	150	101						15
male	7.1667	1	1	infectious Mononucleosis		20			1	1	1	0	1	0		3.21	90	76						20
male	4.75	1	1	infectious Mononucleosis		25			1	1	1	1	1	0		6.95	59	77						27
male	2	1	1	infectious Mononucleosis	cytomegalovirus/Mycoplasma	few			1	1	1	1	1	0		14.99	38	67						24
male	2.3333		1	infectious Mononucleosis	cytomegalovirus	17			1	1	0	1	1	1		4.43	447	297						31
female	3.4167	1	1	infectious Mononucleosis	Mycoplasma/Parvovirus/cytomegalovirus				1	1	1	0	0	0		4.5	54	60						24
male	3.8333		1	infectious Mononucleosis	Mycoplasma	8			1	1	1	1	0	0		4.87	55	45						28
male	1.9495	1	1	infectious Mononucleosis	cytomegalovirus	25			1	1	1	1	1	0		8.78	49	40						13
female	2.8333	1	1	infectious Mononucleosis		6			1	1	1	1	0	1		6.55	36	91						114
male	3.0833	1	1	infectious Mononucleosis		few			1	1	1	0	0	0		6.81	17	36						22
male	2.5		1	infectious Mononucleosis	cytomegalovirus	8			1	1	1	0	0	0		8.29	9	28						20
male	1.3333	1	1	infectious Mononucleosis	Mycoplasma	10			1	1	1	1	1	0		4.72	149	102						46
female	4.75	1	1	infectious Mononucleosis	Mycoplasma	15			1	1	1	0	0	0		4.71	173	88						18
male	3.8333		0	infectious Mononucleosis	cytomegalovirus	few			1	1	1	1	1	1		7.15	27	35						39
male	4.5	1	1	infectious Mononucleosis	cytomegalovirus	17			1	1	1	0	0	1		13.46	19	38						24
male	0.7829	1	0	infectious Mononucleosis	cytomegalovirus	10			1	1	1	0	1	0		8.01	61	94						85
male	5.25	1	1	infectious Mononucleosis	cytomegalovirus	15			1	1	1	1	1	0		10.26	16	30						11
male	4.1667		1	infectious Mononucleosis	Mycoplasma/Parvovirus	12			1	1	1	0	0	0		4.28	13	30						26
male	3		1	infectious Mononucleosis		20			1	1	0	1	0	0		7.53	47	49						14
male	9.8333	1	0	infectious Mononucleosis					1	1	1	0	0	1		5.71	17	52						34
male	0.9906		0	infectious Mononucleosis		10			0	1	1	1	0	1		6.2	68	90						39
female	5.3333	1	1	infectious Mononucleosis	Mycoplasma/cytomegalovirus/Parvovirus	few			1	1	1	1	1	1		5.66	33	58						49
male	3.75	1	1	infectious Mononucleosis	Mycoplasma/cytomegalovirus/Parvovirus	10			1	1	1	1	1	1		4.44	105	76						74
male	4.4167	1	1	infectious Mononucleosis		15			1	1	1	1	0	0		9.72	359	254						21
female	6.75		1	infectious Mononucleosis	Mycoplasma	25			1	1	1	0	0	0		8.09	181	174						25
male	2.5833	1	1	infectious Mononucleosis	Mycoplasma/cytomegalovirus	few			1	1	0	0	0	1		6.05	39	34						24
male	3.9167	1	1	infectious Mononucleosis	Mycoplasma				0	1	1	1	0	1		7.01	165	110						20
female	6.1667	1	1	infectious Mononucleosis		7			1	1	1	1	1	0		10.11	39	64						51
female	1.9128		1	infectious Mononucleosis	cytomegalovirus	few			1	1	1	1	1	0		6.58	92	102						12
male	9.5833	1	1	infectious Mononucleosis	Mycoplasma	few			1	1	1	0	0	0		11.3	58	79						39
female	5.75	1	1	infectious Mononucleosis	cytomegalovirus/Parvovirus	7			1	1	1	1	1	0		9.99	130	78						18
female	6.6667	1	0	infectious Mononucleosis	cytomegalovirus	20			1	1	1	1	1	0		7.29	144	158						30
female	12.9167	1	1	infectious Mononucleosis		12			1	1	1	1	0	1		22.39	167	228						108
male	1.5137	1	1	infectious Mononucleosis	cytomegalovirus/Mycoplasma	8			1	1	1	1	1	0		14.29	42	55						32
male	7.4167	1	1	infectious Mononucleosis	cytomegalovirus/Mycoplasma	23			1	0	1	1	0	0		7，58	47	56						79
male	12.25	1	1	infectious Mononucleosis	cytomegalovirus	13			1	1	1	1	0	1		6.86	11	34						44
male	4.75	1	1	infectious Mononucleosis	cytomegalovirus/Mycoplasma	30			1	1	1	0	0	1		5.12	22	40						18
male	7	1	1	infectious Mononucleosis	Mycoplasma				1	1	1	0	0	0		6.81	4	24						21
female	3.5833	1	0	infectious Mononucleosis		few			1	1	1	1	0	0		8.48	62	60						9
male	3.5	1	1	infectious Mononucleosis	Mycoplasma	12			1	1	1	1	0	1		10.77	15	76						14
male	4.75	1	1	infectious Mononucleosis	Mycoplasma	few			1	1	1	1	1	0		5.28	46	39						12
female	3.5	1	1	infectious Mononucleosis	Mycoplasma	8			1	1	1	1	0	0		7.03	34	57						20
male	7.1667	1	1	infectious Mononucleosis	Parvovirus	5			1	1	1	0	0	0		7.91	9	91						48
female	4	1	0	infectious Mononucleosis		10			1	1	1	1	1	0		4.32	16	45						22
male	3.3333	1	1	infectious Mononucleosis	cytomegalovirus	10			1	1	1	1	1	0		5.66	19	74						123
male	1.5521	1	1	infectious Mononucleosis	cytomegalovirus/Mycoplasma	15			1	1	1	0	0	0		16.09	16	35						25
male	2.5	1	1	infectious Mononucleosis	cytomegalovirus	13			1	1	1	0	0	0		13.99	20	45						31
male	3.9167	2	1	infectious Mononucleosis	Mycoplasma	5			1	1	1	0	0	0		7.26	12	48						35
male	2.75		0	infectious Mononucleosis		6			0	1	1	1	1	1		5.51	345	276						160
male	8.8333	1	1	infectious Mononucleosis	Mycoplasma	35			1	1	1	1	0	1		14.57	540	523						4
male	10.9167	1	1	infectious Mononucleosis	Mycoplasma	12			1	1	1	1	1	1		1.88	138	156						16
female	8.9167		1	infectious Mononucleosis	Mycoplasma	10			1	1	1	1	0	0		7.23	30	48						56
male	2.9167	1	1	infectious Mononucleosis	Mycoplasma/cytomegalovirus	28			0	1	1	1	1	0		19.95	48	54						31
male	1.7324		1	infectious Mononucleosis	Mycoplasma/cytomegalovirus	54			0	1	1	1	0	0		7.58	29	46						50
male	6	1	0	infectious Mononucleosis	Mycoplasma	5			1	1	0	1	0	0		5.81	187	70						17
male	3.1667	1	1	infectious Mononucleosis	Mycoplasma	7			1	1	1	1	0	1		12.51	17	35						34
male	2.0833	1	1	infectious Mononucleosis		23			1	1	1	1	1	0		18.37	288	227						25
female	4.5	1	1	infectious Mononucleosis	Mycoplasma	7			1	1	1	0	0	0		5.46	111	96						22
female	4.5		1	infectious Mononucleosis	cytomegalovirus	16			1	1	1	1	1	1		14.36	130	76						38
male	1.4358	1	0	infectious Mononucleosis	cytomegalovirus	10			1	1	1	1	0	0		6.88	123	52						26
male	1.8021		0	infectious Mononucleosis	Mycoplasma	高			1	1	0	1	0	1		5.48	445	246						15
female	6.4167	1	1	infectious Mononucleosis	cytomegalovirus	17			1	1	1	0	0	1		5	51	53						18
male	4.75	1	1	infectious Mononucleosis	Mycoplasma	few			1	1	1	1	0	1		2.94	249	231						26
male	11.8333	1	1	infectious Mononucleosis	Mycoplasma/Parvovirus	30			1	1	1	1	0	0		12.59	102	128						59
male	3.75		1	infectious Mononucleosis	Mycoplasma/cytomegalovirus	15			1	1	1	1	0	0		10.24	36	41						30
male	2.75	1	1	infectious Mononucleosis	Mycoplasma/cytomegalovirus	few			1	1	1	1	1	0		5.48	259	164						41
male	2	1	0	infectious Mononucleosis	Mycoplasma/cytomegalovirus	12			1	1	1	1	0	0		2.58	481	440						77
female	10.9167		1	infectious Mononucleosis	Mycoplasma/cytomegalovirus	25			1	1	1	1	1	1		9.92	38	48						73
male	5	1	0	infectious Mononucleosis	cytomegalovirus/Parvovirus	10			1	1	1	0	0	0		4.1	307	136						10
female	13.1667	1	1	infectious Mononucleosis	Mycoplasma	18			1	1	1	1	0	0		7.82	16	32						29
female	4.75	1	1	infectious Mononucleosis	Parvovirus	few			0	1	1	1	1	0		9.23	114	104						24
male	1.8075	1	0	infectious Mononucleosis	cytomegalovirus	13			1	1	1	0	0	1		10.14	15	33						44
male	2.5	1	0	infectious Mononucleosis	cytomegalovirus/Parvovirus	few			1	1	1	1	0	0		5.32	17	28						56
male	3.5	1	1	infectious Mononucleosis		8			1	1	1	1	1	0		6.73	71	64						10
male	6.75	1	1	infectious Mononucleosis	Mycoplasma	17			1	1	1	1	0	0		14.43	22	42						39
female	1.4413	1	1	infectious Mononucleosis	Mycoplasma	13			1	1	1	0	0	0		6.19	27	28						36
male	3.0833	1	1	infectious Mononucleosis	cytomegalovirus/Parvovirus/Mycoplasma	few			1	1	1	1	1	0		4.36	25	42						25
male	4.6667	1	1	infectious Mononucleosis		12			1	0	1	1	1	1		12.69	269	183						50
female	3.5833	1	1	infectious Mononucleosis		13			1	1	1	0	0	0		10.53	14	32						30
male	5.6667	2	1	infectious Mononucleosis	cytomegalovirus	19			1	1	1	1	1	0		14.86	24	37						47
male	2.1667	1	1	infectious Mononucleosis	cytomegalovirus	16			1	1	1	1	0	1		4.87	29	33						23
male	1.4073	1	1	infectious Mononucleosis		15			1	1	1	1	0	0		4.45	19	48						20
male	3.0833		1	infectious Mononucleosis	Mycoplasma/adenovirus/cytomegalovirus	10			1	1	1	1	0	1		11.5	135	98						12
female	8.9167	1	1	infectious Mononucleosis	Mycoplasma	16			1	1	1	1	1	0		5.36	25	37						17
female	8.4167	1	1	infectious Mononucleosis	Mycoplasma	9			1	1	1	1	0	0		5.11	11	31						36
male	3.3333	1	1	infectious Mononucleosis	Mycoplasma/cytomegalovirus	18			1	1	1	1	0	0		8.12	48	62						19
male	5.5	1	1	infectious Mononucleosis		15			1	1	1	1	1	0		10.04	223	105						52
female	2.5		1	infectious Mononucleosis	cytomegalovirus	10			1	1	1	1	1	0		21.64	13	38						26
female	0.8936	1	1	infectious Mononucleosis		15			1	1	1	1	1	0		4.97	68	169						18
female	5.4167	1	1	infectious Mononucleosis		10			1	1	1	1	1	0		7.55	135	95						15
female	9.5	1	1	infectious Mononucleosis	Mycoplasma	10			1	1	1	1	1	0		6.42	27	23						19
male	6.6667	1	1	infectious Mononucleosis	Mycoplasma/Streptococcus	12			1	1	1	0	1	1		6.28	23	38						20
male	1.0575	1	1	infectious Mononucleosis	Mycoplasma	18			1	1	1	1	1	0		6.46	28	57						33
female	1.9605	1	1	infectious Mononucleosis	Mycoplasma	10			1	1	1	1	1	1		3.88	38	73						88
female	3.5833	1	1	infectious Mononucleosis	Mycoplasma/cytomegalovirus	few			1	1	1	1	1	0		7.08	39	35						39
male	1.4128	2	0	infectious Mononucleosis		12			1	0	0	1	1	0		6.71	48	92						50
male	1.2582	1	1	infectious Mononucleosis		13			1	1	1	1	0	1		12.3	76	68						33
male	9.5	1	1	infectious Mononucleosis		few			1	1	1	1	0	0		5.07	42	55						69
female	1.8662	1	1	infectious Mononucleosis	Mycoplasma/cytomegalovirus	30			1	1	1	1	1	0		25.11	233	71						27
female	3.0833	1	1	infectious Mononucleosis	cytomegalovirus/Parvovirus	10			1	1	1	0	0	1		4.99	169	138						53
male	2.0833	1	0	infectious Mononucleosis		20			1	1	1	0	0	1		24.69	797	501						34
male	2.75	1	1	infectious Mononucleosis	Mycoplasma				1	1	1	1	0	0		5.31	136	127						23
male	8.4167	1	1	infectious Mononucleosis		5			1	1	1	1	1	0		5.01	204	151						13
female	7.6667	1	1	infectious Mononucleosis	cytomegalovirus/Parvovirus	26			1	1	0	1	0	0		4.18	175	136						29
female	3.4167	1	1	infectious Mononucleosis	Mycoplasma	28			1	1	1	1	1	0		20.6	96	73						17
male	4.3333	1	1	infectious Mononucleosis	cytomegalovirus/Mycoplasma	few			1	1	1	1	1	0		4.09	117	89						20
female	12.0833	1	1	infectious Mononucleosis	Mycoplasma	10			1	1	0	0	0	1		12.12	59	56						22
female	1.0274	1	1	infectious Mononucleosis	Mycoplasma/cytomegalovirus	15			1	1	1	0	0	1		10.01	142	122						25
female	4.4167	1	0	infectious Mononucleosis	cytomegalovirus/Mycoplasma	12			0	1	1	1	0	0		14.58	61	63						37
male	0.9797	1	1	infectious Mononucleosis		49			1	1	1	1	1	1		18.86	98	61						24
female	1.2911	1	1	infectious Mononucleosis	cytomegalovirus/Mycoplasma	24			1	1	1	0	0	0		23.04	32	58						46
male	2.0833	1	0	infectious Mononucleosis	cytomegalovirus	few			1	1	1	1	1	0		5.87	477	210						23
female	2.75	1	1	infectious Mononucleosis	Mycoplasma/cytomegalovirus	25			1	1	1	1	1	0		14.87	86	57						16
female	3.5		1	infectious Mononucleosis	Mycoplasma	27			1	1	1	1	1	1		9.81	210	77						4
male	4.8333	1	1	infectious Mononucleosis	cytomegalovirus	10			1	1	1	1	0	0		4.07	37	47						24
male	1.9769		1	infectious Mononucleosis		25			1	1	1	1	1	0		11.8	59	58						45
male	5.1667	1	0	infectious Mononucleosis		13			1	1	1	1	0	0		3.71	81	82						21
female	7.5	1	1	infectious Mononucleosis	Mycoplasma				1	1	1	0	0	1		9.57	300	201						29
male	2.5	1	0	infectious Mononucleosis		18			1	1	1	1	0	1		3.95	48	36						17
female	4.75	1	1	infectious Mononucleosis	Mycoplasma	35			1	1	1	1	0	1		8.13	241	104						142
female	3.0833	1	0	infectious Mononucleosis	Mycoplasma	15			1	1	1	1	1	0		10.92	194	129						15
male	5.6667	1	1	infectious Mononucleosis	Mycoplasma	30			1	1	1	1	1	0		8，38	181	118						20
male	7.6667	1	1	infectious Mononucleosis	cytomegalovirus	30			1	0	1	1	0	0		48.55	287	189						54
male	0.8717	1	1	infectious Mononucleosis	cytomegalovirus	5			1	1	1	0	0	1		7.2	18	49						56
female	2.0833	1	1	infectious Mononucleosis	Mycoplasma/cytomegalovirus	15			1	1	1	1	1	0		8.87	25	58						50
female	10.1667	1	0	infectious Mononucleosis	Mycoplasma	15			1	1	1	1	1			5.4	14	30						26
female	4.3333	1	0	infectious Mononucleosis		15			1	1	1	0	0	0		7.6	19	31						25
male	1.9934		1	infectious Mononucleosis	Mycoplasma/cytomegalovirus	12			1	1	1	0	0	0		6.18	10	40						51
female	2.9167	1	1	infectious Mononucleosis	Mycoplasma	15			1	1	1	1	0	0		6.35	32	50						81
female	3.6667	1	1	infectious Mononucleosis	Mycoplasma	20			1	1	1	1	1	1		11.4	326	196						105
male	2.75	1	1	infectious Mononucleosis	Mycoplasma/cytomegalovirus	17			0	1	1	0	1	0		9.32	59	44						23
female	3.6667	1	1	infectious Mononucleosis	Mycoplasma/cytomegalovirus	10			1	1	1	1	1	0		9.08	12	23						20
male	1.6667	1	1	infectious Mononucleosis	Mycoplasma/cytomegalovirus	few			1	0	0	1	0	1		11.15	637	125						37
female	3.9167	1	1	infectious Mononucleosis	cytomegalovirus	8			1	1	1	1	1	0		7.07	65	54						29
male	4.9167	1	1	infectious Mononucleosis		7			1	1	1	1	0	1		7.58	9	39						53
male	2.0833	1	1	infectious Mononucleosis	Mycoplasma	15			1	1	1	0	1	0		8.08	48	85						30
female	1.3854	1	1	infectious Mononucleosis	Mycoplasma/cytomegalovirus				1	1	1	0	0	1		5.21	20	29						15
male	2.8333		1	infectious Mononucleosis	cytomegalovirus	10			1	1	1	0	0	1		12.31	73	82						76
male	2.0833	1	1	infectious Mononucleosis		18			1	1	1	1	1	0		9.41	35	90						118
female	3.4167	1	1	infectious Mononucleosis	cytomegalovirus	15			1	1	1	1	1	0		15.42	21	28						18
male	2.3333	1	1	infectious Mononucleosis	cytomegalovirus	8			1	1	1	1	1	1		18.8	166	168						32
female	1.4879	1	1	infectious Mononucleosis	Mycoplasma	15			0	1	1	1	1	0		14.72	21	48						83
male	5.0833	1	0	infectious Mononucleosis	Mycoplasma/cytomegalovirus				0	1	1	1	0	1		5.41	87	83						36
female	2.4167	1	1	infectious Mononucleosis		8			1	1	1	1	0	0		10.91	12	31						41
female	4.4167		1	infectious Mononucleosis	Mycoplasma	8			1	1	1	1	1	0		7.24	10	27						18
male	4	1	1	infectious Mononucleosis		30			1	1	1	1	0	1		6.57	20	41						16
male	5.75	1	1	infectious Mononucleosis	cytomegalovirus	20			1	1	1	1	0	1		8.05	58	75						24
male	4.9167	1	1	infectious Mononucleosis	Mycoplasma	10			1	0	1	1	1	0		20.92	27	43						32
male	1.0219	1	1	infectious Mononucleosis	Mycoplasma	17			1	1	1	1	0	0		7.74	48	53						14
female	8.1667	1	0	infectious Mononucleosis	Mycoplasma	20			1	1	1	1	1	0		15.82	129	45						35
male	1.0548	1	1	infectious Mononucleosis	cytomegalovirus	8			1	1	1	1	0	1		11.93	73	61						43
male	3.5833		1	infectious Mononucleosis	Mycoplasma/cytomegalovirus				0	1	0	1	1	0		7.35	69	54						56
female	3.25	1	1	infectious Mononucleosis	cytomegalovirus	12			1	1	1	1	0	0		5.73	25	40						67
male	4.9167	1	1	infectious Mononucleosis		36			1	1	1	1	1	1		10.48	76	52						42
male	2.75	1	1	infectious Mononucleosis		8			0	1	1	0	0	1		9.36	174	60						31
male	6.3333	1	1	infectious Mononucleosis		7			1	1	1	1	0	1		7.64	20	35						43
female	3	1	0	infectious Mononucleosis		15			1	1	1	1	1	0		9.12	26	34						22
female	2.8333	1	1	infectious Mononucleosis	Mycoplasma	12			1	1	1	0	0	1		6.59	263	258						24
female	2.8333	1	1	infectious Mononucleosis	Mycoplasma	15			1	1	1	0	0	0		6.88	139	99						33
female	3.8333	1	0	infectious Mononucleosis	cytomegalovirus	12			1	1	1	0	1	1		6.75	109	64						30
male	2.75	1	0	infectious Mononucleosis		12			1	1	1	1	1	0		8.46	49	59						20
male	4.9167		1	infectious Mononucleosis		15			1	1	0	1	0	1		6.38	335	309						36
female	6.6667	1	1	infectious Mononucleosis	cytomegalovirus/Mycoplasma	10			1	1	1	1	1	0		8.34	20	51						32
female	1.2242	1	1	infectious Mononucleosis		15			1	1	1	1	1	1		6.06	76	64						34
female	4.5	1	1	infectious Mononucleosis					1	1	1	1	0	0		3.93	19	55						101
male	2.5833	1	1	infectious Mononucleosis					1	1	1	1	0	0		5.06	21	27						18
male	2.4167	1	1	infectious Mononucleosis	cytomegalovirus				1	1	1	1	1	1		9.23	121	129						114
female	4	1	1	infectious Mononucleosis	Mycoplasma	9			1	1	1	1	0	1		9.34	108	79						31
female	2.25	1	1	infectious Mononucleosis	cytomegalovirus/Mycoplasma	15			1	1	1	0	0	0		10.16	30	48						34
male	3.8333	1	1	infectious Mononucleosis		10			1	1	1	0	0	1		5.53	52	22						29
female	1.8854	1	1	infectious Mononucleosis		few			1	1	1	1	1	0		5.34	27	37						16
male	3.3333	1	1	infectious Mononucleosis	Mycoplasma/Legionella/cytomegalovirus	25			1	1	1	1	1	0		5.34	165	100						14
female	6.4167	1	1	infectious Mononucleosis	Mycoplasma/cytomegalovirus/Parvovirus	12			1	1	1	1	1	0		9.72	159	146						140
male	4.4167	1	1	infectious Mononucleosis	Mycoplasma/Parvovirus	13			1	1	1	0	0	0		3.93	52	45						26
male	1.8662	1	1	infectious Mononucleosis	Mycoplasma	12			1	1	1	0	0	1		6.29	86	86						89
male	7.6667	1	1	infectious Mononucleosis		15			1	0	1	1	1	0		15.66	943	566						30
male	1.7966	1	1	infectious Mononucleosis		30			1	1	1	1	0	1		26.82	361	138						30
female	3	1	1	infectious Mononucleosis	Mycoplasma	35			1	1	1	1	0	1		11.01	18	43						100
male	5.1667	1	1	infectious Mononucleosis		15			1	1	1	1	1	1		3.04	81	94						20
male	3.0833	1	1	infectious Mononucleosis	cytomegalovirus/Mycoplasma	few			1	1	1	1	0	0		5.15	138	71						33
male	4.1667	1	1	infectious Mononucleosis	cytomegalovirus	10			1	1	1	1	0	1		4.66	34	31						25
male	5.1667	1	1	infectious Mononucleosis	Mycoplasma	9			1	1	0	1	1	1		6.99	28	30						21
female	2.1667	1	1	infectious Mononucleosis	cytomegalovirus	15			1	1	1	1	1	1		5.16	46	47						23
male	5.0833		1	infectious Mononucleosis	cytomegalovirus	10			1	1	1	0	0	0		3.81	11	20						15
female	2.75	1	1	infectious Mononucleosis		30			1	1	1	1	1	0		5.68	25	35						17
female	5.25	1	1	infectious Mononucleosis	Mycoplasma	20			0	1	1	1	1	0		7.57	61	91						13
female	6.25	1	1	infectious Mononucleosis	Mycoplasma	11			1	1	1	1	1	1		8.95	282	244						26
female	1.6694	1	1	infectious Mononucleosis	Mycoplasma/cytomegalovirus	15			1	1	1	1	0	1		2.03	7	19						19
male	4.25	1	1	infectious Mononucleosis	Mycoplasma/cytomegalovirus	8			1	1	1	1	0	0		5.45	61	27						18
male	4.75	1	1	infectious Mononucleosis	Mycoplasma	10			1	1	1	1	1	0		11.78	24	47						41
male	2.6667	1	1	infectious Mononucleosis	Mycoplasma	18			1	1	1	1	0	0		10.81	249	161						26
male	1.4304	1	1	infectious Mononucleosis	cytomegalovirus	35			1	1	1	1	1	1		21.5	35	56						79
female	1.6886	1	0	infectious Mononucleosis	Mycoplasma/cytomegalovirus	9			1	1	1	1	1	1		7.28	195	181						84
female	1.4961	1	0	infectious Mononucleosis	cytomegalovirus	8			1	1	1	1	1	1		6.55	83	96						88
male	1.8048	1	1	infectious Mononucleosis	Mycoplasma/cytomegalovirus/chlamydia	few			1	1	1	1	0	0		5.27	54	44						20
female	3.0833	2	1	infectious Mononucleosis	cytomegalovirus	few			1	1	1	1	0	0		6.87	8	28						44
female	4	1	0	infectious Mononucleosis		15			0	1	1	1	1	0		7.93	241	80						25
male	2.8333		1	infectious Mononucleosis					1	1	1	0	0	0		9.7	18	28						32
male	2.5	1	0	infectious Mononucleosis	cytomegalovirus	8			1	1	1	0	0	1		9.27	24	34						30
male	1.9906	1	1	infectious Mononucleosis	Mycoplasma	9			1	1	1	1	1	0		11	94	83						14
female	7.9167	1	1	infectious Mononucleosis		8			1	1	1	1	1	1		5.75	24	37						40
male	4.25	1	0	infectious Mononucleosis	Mycoplasma/cytomegalovirus	50			1	1	1	1	0	0		14.35		54						19
female	1.3185	1	1	infectious Mononucleosis	cytomegalovirus	18			0	1	1	1	1	1		13.45	270	154						12
male	3.4167	1	1	infectious Mononucleosis		20			1	1	1	0	0	0		4.8	47	30						26
male	4.5		0	infectious Mononucleosis		30			1	1	1	0	0	0		17.21	15	43						60
female	6.1667	1	1	infectious Mononucleosis	Mycoplasma/Streptococcus	15			1	1	1	1	1	0		6.96	39	34						19
male	5.8333	1	1	infectious Mononucleosis	Mycoplasma	12			1	1	1	0	0	0		9.92	41	71						27
male	6.4167	1	0	infectious Mononucleosis		20			1	1	1	1	0	0		5.58	18	37						32
male	6.8333	1	1	infectious Mononucleosis	Mycoplasma	20			1	1	1	0	1	0		13.21	309	193						17
male	8.3333	1	1	infectious Mononucleosis		20			1	1	1	1	0	1		19.53	117	72						50
male	3.3333	1	0	infectious Mononucleosis	cytomegalovirus	6			0	1	1	0	0	1		5.54	55	78						140
female	4.1667	1	1	infectious Mononucleosis	Mycoplasma/cytomegalovirus	8			1	1	1	0	0	1		7.68	20	44						39
male	1.4523	1	1	infectious Mononucleosis	Mycoplasma/cytomegalovirus	30			0	1	1	1	1	0		18.55	771	296						65
male	1.1299	1	1	infectious Mononucleosis		45			0	1	1	1	0	1		14.64	53	57						25
male	4.25	1	1	infectious Mononucleosis	cytomegalovirus	12			1	0	1	1	0	1		10.71	225	98						36
female	1.8553	1	1	infectious Mononucleosis	Mycoplasma	28			1	1	1	1	1	1		11.7	73	68						58
male	1.6162	1	1	infectious Mononucleosis	Mycoplasma	17			1	1	1	1	0	0		14.81	47	42						112
male	1.2434	1	1	infectious Mononucleosis	Mycoplasma	17			1	1	1	1	0	1		7.51	64	59						99
male	8	1	0	infectious Mononucleosis		few			0	1	1	1	0	1		7.41	100	95						28
female	3.25	1	1	infectious Mononucleosis		15			1	1	1	1	1	0		5.73	84	43						15
male	5.1667	1	1	infectious Mononucleosis	Mycoplasma	15			1	1	1	1	1	0		10.21	12	23						18
male	6.0833	2	0	infectious Mononucleosis		few			1	1	0	1	0	0		5.71	15	45						79
female	2.3333	2	0	infectious Mononucleosis	Mycoplasma	10			1	0	1	1	0	0		13.72	37	29						32
female	4.4167	1	0	infectious Mononucleosis	Mycoplasma	15			1	1	1	1	1	1		4.77	18	33						21
male	2	1	1	infectious Mononucleosis	Mycoplasma	15			1	1	1	1	0	1		2.9	213	103						19
male	5.1667	1	1	infectious Mononucleosis		55			1	0	1	1	1	0		14.69	61	75						86
female	3.6667		0	infectious Mononucleosis		27			1	1	1	1	1	1		13.86	227	147						24
male	3.5	1	1	infectious Mononucleosis	cytomegalovirus	25			1	1	0	0	1	1		12.53	177	172						77
male	5.0833	1	0	infectious Mononucleosis	cytomegalovirus/Mycoplasma	32			1	1	1	1	1	0		9.23	104	89						30
male	6.8333		0	infectious Mononucleosis	Mycoplasma	few			1	1	1	0	0	1		11.76	13	38						41
male	2.0833	1	0	infectious Mononucleosis	cytomegalovirus/Mycoplasma	15			1	1	1	1	0	0		5.46	25	53						68
female	3.5	1	1	infectious Mononucleosis		8			1	1	1	1	0	0		10.89	120	64						78
male	1.4304	1	0	infectious Mononucleosis	Mycoplasma	23			1	1	1	1	0	0		7.39	7	26						18
male	4.6667	1	1	infectious Mononucleosis		8			1	1	1	1	1	0		12.98	32	76						27
male	3.5833	1	0	infectious Mononucleosis		10			1	1	1	1	1	0		9.11	17	39						55
female	3.5833	1	1	infectious Mononucleosis		10			1	0	1	1	1	0		8.64	51	70						37
male	2.9167	1	1	infectious Mononucleosis		22			1	1	1	1	1	1		3.06	157	194						23
male	3.5	1	0	infectious Mononucleosis	cytomegalovirus/Parvovirus/Mycoplasma	15			1	1	1	1	1	0		8.37	437	190						6
female	5	1	0	infectious Mononucleosis	Mycoplasma	23			0	1	1	1	0	0		3.98	9	39						91
male	6.9167	1	0	infectious Mononucleosis		15			1	1	1	1	0	1		5.55	43	52						28
male	2	1	0	infectious Mononucleosis	cytomegalovirus	10			1	1	1	1	1	0		5.97	14	41						66
male	1.5833	1	0	infectious Mononucleosis		24			1	1	1	1	1	1		10.26	599	318						28
female	5.5833	1	0	infectious Mononucleosis		16			1	1	1	1	0	0		8.94	90	90						39
female	1.1628	1	1	infectious Mononucleosis		few			1	1	1	1	0	0		3.67	11	27						21
male	2.8333	1	1	infectious Mononucleosis	cytomegalovirus	12			1	1	1	1	1	0		5.36	36	55						61
male	7.6667	1	0	infectious Mononucleosis	Mycoplasma	30			1	1	1	1	0	1		8.11	381	415						22
female	7.1667	1	0	infectious Mononucleosis	Mycoplasma	18			1	1	1	1	0	0		4，54	119	32						26
female	6.0833	1	1	infectious Mononucleosis	Mycoplasma	18			1	1	1	1	1	0		4.97	216	101						16
female	10.9167	1	1	infectious Mononucleosis		10			1	0	1	1	1	0		9.43	24	36						19
male	2.25	1	0	infectious Mononucleosis	cytomegalovirus/Mycoplasma	15			1	1	1	1	1	0		7.71	34	26						17
female	6	1	1	infectious Mononucleosis		15			1	1	1	1	0	0		7.33	90	74						56
male	9.75	1	0	infectious Mononucleosis		12			1	1	1	0	0	1		2.88	88	60						48
male	9	1	1	infectious Mononucleosis					1	1	1	0	0	0		12.72	11	30						40
male	1.1409	1	1	infectious Mononucleosis		20			1	1	1	0	0	0		12.92	24	42						17
male	3.8333	1	1	infectious Mononucleosis	cytomegalovirus/Mycoplasma	20			1	1	0	1	0	1		25.76	19	45						36
female	2.5	1	1	infectious Mononucleosis	cytomegalovirus	25			1	1	1	1	1	0		5.96	57	53						15
male	2.25	1	0	infectious Mononucleosis		17			1	1	1	1	0	1		4.69	51	36						21
male	12.5	1	0	infectious Mononucleosis	Mycoplasma	few			1	1	1	1	1	1		6.28	36	73						24
male	3.75	1	0	infectious Mononucleosis	Mycoplasma	17			1	1	1	1	1	0		4.49	273	410						28
male	7.0833	1	1	infectious Mononucleosis		8			1	1	1	0	0	0		12.48	38	57						20
male	2.0833	1	0	infectious Mononucleosis		12			1	1	1	1	1	1		3.32	224	158						20
female	4.25	1	1	infectious Mononucleosis	cytomegalovirus/Mycoplasma	10			0	1	1	1	1	1		4.26	108	106						26
male	8.75	1	1	infectious Mononucleosis		22			1	1	1	0	0	1		4.96	28	51						23
male	2	1	1	infectious Mononucleosis	cytomegalovirus	22			1	1	1	1	1	0		7.39	50	76						180
female	6.1667	1	0	infectious Mononucleosis	Mycoplasma	25			1	1	1	1	1	1		8.83	114	193						23
male	3.75	1	1	infectious Mononucleosis	cytomegalovirus/Mycoplasma/Parvovirus	10			1	1	1	1	0	1		6.71	98	70						13
male	3.0833	1	0	infectious Mononucleosis	Mycoplasma	25			1	1	1	0	0	1		6.15	48	64						60
male	1.8075	1	1	infectious Mononucleosis	cytomegalovirus	16			0	0	1	0	0	1		12.24	702	475						81
female	4.25		1	infectious Mononucleosis	cytomegalovirus/Mycoplasma	13			1	1	1	0	0	1		6.36	20	38						24
male	3.3333	1	1	infectious Mononucleosis		15			1	1	1	1	0	1		6.39	122	109						98
female	6.3333	1	1	infectious Mononucleosis	Mycoplasma	17			1	1	1	1	1	1		12.63	67	71						23
female	2	1	1	infectious Mononucleosis		25			1	1	1	1	1	1		7	27	53						79
male	3.6667	1	1	infectious Mononucleosis	cytomegalovirus/Mycoplasma	35			0	1	1	1	0	1		10.42	30	43						30
male	2.6667	1	1	infectious Mononucleosis	cytomegalovirus				1	0	1	1	0	0		9.99	197	121						57
male	0.7774	1	1	infectious Mononucleosis					1	1	1	1	0	1		4.37	14	37						32
male	3.8333	1	0	infectious Mononucleosis	Mycoplasma				1	1	1	0	0	1		4.06	32	40						23
male	3.25	1	1	infectious Mononucleosis					1	1	1	1	0	0		4.86	44	52						84
male	8.0833	1	1	infectious Mononucleosis		10			1	1	1	1	0	0		6.26	21	27						16
female	1.824		1	infectious Mononucleosis		12			1	0	1	1	0	0		10.25	122	85						1
male	1.0767	1	1	infectious Mononucleosis	cytomegalovirus	35			0	1	1	1	0	0		6.18	44	43						18
female	6.4167	1	1	infectious Mononucleosis	Mycoplasma	35			1	1	1	1	0	1		4.78	111	239						24
male	8.0833	1	1	infectious Mononucleosis		12			1	1	1	1	1	1		8.25	144	101						14
female	5.4167	1	0	infectious Mononucleosis		9			1	1	1	1	1	0		7.78	12	36						35
male	2.75	1	1	infectious Mononucleosis	cytomegalovirus	8			1	1	1	1	0	1		11.09	15	27						20
female	2.1667		1	infectious Mononucleosis		10			0	1	1	0	0	1		7.14	171	202						37
female	6.25		0	infectious Mononucleosis	cytomegalovirus	16			1	1	1	0	0	0		7.99	81	140						36
male	5.8333	1	1	infectious Mononucleosis	Mycoplasma	10			1	1	1	0	0	1		10.54	20	38						25
male	2.9167	1	1	infectious Mononucleosis	cytomegalovirus	10			1	1	1	1	1	1		8.44	76	62						20
male	9.4167	1	1	infectious Mononucleosis		15			1	1	1	1	0	0		7.7	49	45						15
male	5.0833	1	1	infectious Mononucleosis	cytomegalovirus/Mycoplasma	12			1	1	1	1	1	1		6.4	214	167						48
male	1.2461	1	0	infectious Mononucleosis		25			1	1	0	1	1	1		11.58	154	144						62
male	3.8333	1	1	infectious Mononucleosis		15			1	1	1	1	1	1		8.62	66	94						43
male	3.6667	1	1	infectious Mononucleosis	cytomegalovirus/Mycoplasma/Parvovirus	8			1	1	0	1	0	1		8.65	56	64						37
female	0.8388	1	1	infectious Mononucleosis		few			1	1	1	1	1	0		9.29	213	177						18
male	3.75		1	infectious Mononucleosis	Mycoplasma/cytomegalovirus	22			1	1	1	0	0	0		17.85	69	46						28
male	1.6518	1	1	infectious Mononucleosis	Mycoplasma/cytomegalovirus	few			1	1	1	1	0	1		11.09	90	70						26
male	6.6667		1	infectious Mononucleosis	Mycoplasma	15			1	1	1	0	0	0		12.89	16	40						33
male	0.75	1	1	infectious Mononucleosis		12			1	1	1	1	1	0		10.78	76	66						28
female	7	1	1	infectious Mononucleosis	Mycoplasma/cytomegalovirus	few			1	1	1	1	1	0		4.95	15	36						45
male	4.3333	1	1	infectious Mononucleosis		43			1	1	1	0	0	0		10.65	265	141						10
male	13.3333	1	1	infectious Mononucleosis		27			0	1	1	0	0	1		12.64	9	35						45
male	2.9167		1	infectious Mononucleosis	Mycoplasma/Parvovirus B19	10			1	1	1	0	1	0		7.83	143	163						43
male	6.3333	1	0	infectious Mononucleosis		19			0	1	1	0	1	0		8.48	45	49						22
male	2.3333	1	0	infectious Mononucleosis	cytomegalovirus	8			0	1	1	1	0	0		6.47	37	46						38
male	1.7215	1	1	infectious Mononucleosis		few			1	1	1	1	0	0		10.26	85	109						34
male	1.6518	1	1	infectious Mononucleosis	cytomegalovirus	8			1	1	1	1	1	0		5.24	42	50						58
male	4.25		0	infectious Mononucleosis		17			1	1	1	0	1	0		6.73	40	62						46
male	3.5833	1	1	infectious Mononucleosis		15			1	1	1	0	0	1		7.98	110	77						14
male	7.6667	1	1	infectious Mononucleosis	cytomegalovirus	10			1	1	1	0	0	1		4.79	218	122						14
male	14.3333		1	infectious Mononucleosis		few			1	1	1	0	0	1		5.98	38	40						1
female	5.1667	1	0	infectious Mononucleosis	Mycoplasma	15			1	1	1	1	0	0		9.29	18	35						21
female	3.6667		1	infectious Mononucleosis	cytomegalovirus				1	1	1	0	0	1		5.63	151	62						26
female	3.4167	1	0	infectious Mononucleosis	cytomegalovirus	12			0	1	1	1	1	1		9.93	64	64						50
male	1.3662	1	1	infectious Mononucleosis	cytomegalovirus	few			1	1	1	0	0	0		6，88	340	168						6.88
female	4.3333		1	infectious Mononucleosis	cytomegalovirus	20			1	1	1	1	1	1		18.53	138	176						24
male	4	1	1	infectious Mononucleosis	cytomegalovirus/Mycoplasma/Parvovirus	10			1	1	1	1	1	1		5.47	59	44						43
female	6.1667	1	1	infectious Mononucleosis		few			1	1	1	0	0	0		7.83	18	41						86
male	3.5833		1	infectious Mononucleosis	cytomegalovirus	few			0	1	1	1	1	0		6.18	74	78						16
female	5.9167	1	1	infectious Mononucleosis	Mycoplasma/Streptococcus	18			1	1	1	0	0	0		10.6	116	108						26
male	1.6491	1	1	infectious Mononucleosis		12			1	1	1	1	1	0		9.24	30	44						26
male	5.4167	1	0	infectious Mononucleosis		12			1	1	1	1	0	0		9.88	61	125						53
female	8.75	1	0	infectious Mononucleosis		11			1	1	1	1	0	0		12.62	133	102						19
male	6.4167	1	0	infectious Mononucleosis		9			1	0	1	1	1	1		16.67	80	82						21
female	10.4167	1	1	infectious Mononucleosis		5			1	1	1	0	0	1		11.27	141	123						16
male	5.3333	1	1	infectious Mononucleosis		10			1	1	1	1	1	1		8.89	152	201						30
female	4	1	0	infectious Mononucleosis	Mycoplasma/cytomegalovirus	11			1	1	1	0	0	0		6	15	33						39
male	1.5384	1	0	infectious Mononucleosis		22			0	1	1	1	0	1		12.7	62	66						23
male	2.5833	1	1	infectious Mononucleosis	Mycoplasma/cytomegalovirus	16			1	1	1	1	1	1		4.05	88	53						36
male	6.6667	1	1	infectious Mononucleosis	Mycoplasma/cytomegalovirus/Parvovirus	23			1	0	1	1	1	0		14.19	22	49						24
female	3.4167	1	1	infectious Mononucleosis	cytomegalovirus/Parvovirus	10			1	1	1	1	0	0		8.61	80	77						14
male	0.7747	1	1	infectious Mononucleosis	cytomegalovirus/Mycoplasma	10			1	1	1	0	0	0		8.71	11	34						34
male	1.216	1	0	infectious Mononucleosis	cytomegalovirus/Mycoplasma	few			0	1	1	1	0	0		7.64	19	28						42
male	4.5833	1	1	infectious Mononucleosis	cytomegalovirus	5			0	1	1	0	1	1		6.62	1626	825						33
female	4.75		1	infectious Mononucleosis	cytomegalovirus	12			1	1	1	0	0	1		5.08	47	52						102
female	6.9167	1	1	infectious Mononucleosis	Streptococcus/Parvovirus	13			1	1	1	0	0	0		10	40	49						40
female	2.8333	1	0	infectious Mononucleosis	cytomegalovirus	6			1	1	1	0	0	1		11.2	279	146						34
female	8		1	infectious Mononucleosis	cytomegalovirus	9			1	0	0	1	1	0		5.77	86	80						17
female	4.0833	1	1	infectious Mononucleosis	cytomegalovirus	20			1	1	1	0	1	0		7.41	121	70						20
female	4.3333	1	1	infectious Mononucleosis		8			1	1	1	0	0	0		6.83	78	81						100
male	7	1	1	infectious Mononucleosis	cytomegalovirus/Mycoplasma	5			1	1	1	0	0	0		5.65	147	96						19
male	3.75	1	1	infectious Mononucleosis	cytomegalovirus/Mycoplasma				1	1	1	0	0	0		12.34	27	48						66
male	3.0833	1	0	infectious Mononucleosis		8			1	1	1	1	1	0		7.07	147	150						15
male	1.4249	1	1	infectious Mononucleosis	Mycoplasma	few			1	1	1	1	0	0		9.664	113	69						38
female	6.3333	1	1	infectious Mononucleosis	Mycoplasma	38			0	1	1	1	1	0		8.04	14	22						20
female	6.3333	1	0	infectious Mononucleosis	cytomegalovirus	14			1	1	1	1	1	1		5.65	160	147						64
male	6.0833	1	1	infectious Mononucleosis	Mycoplasma	15			1	1	1	1	1	1		5.12	114	101						23
male	6.0833	1	1	infectious Mononucleosis	cytomegalovirus/Mycoplasma	16			1	1	1	1	1	1		25.45	40	81						35
male	1.9687	1	1	infectious Mononucleosis		17			0	1	1	1	1	0		8.66	46	91						88
female	6.75	1	0	infectious Mononucleosis	Staphylococcus epidermidis	30			1	1	1	1	0	0		10.96	349	120						17
female	1.0767	1	1	infectious Mononucleosis	cytomegalovirus/Mycoplasma	15			0	1	1	1	1	1		8.19	103	109						26
female	3	1	1	infectious Mononucleosis	cytomegalovirus/Mycoplasma	15			1	1	1	0	0	0		5.52	67	38						16
male	4.8333		0	infectious Mononucleosis	cytomegalovirus/Mycoplasma	few			1	1	1	0	0	1		7.9	295	136						34
female	3.3333	1	1	infectious Mononucleosis	cytomegalovirus	40			1	1	1	1	1	0		23.27	201	199						32
male	6	1	1	infectious Mononucleosis	cytomegalovirus	16			0	1	1	1	1	1		8.45	69	72						78
male	1.5356	1	1	infectious Mononucleosis	cytomegalovirus	9			1	1	1	1	1	0		3.64	57	106						78
female	2.1667	1	1	infectious Mononucleosis	Mycoplasma	6			1	1	1	0	0	1		6.87	89	156						16
female	2.3333	1	1	infectious Mononucleosis	cytomegalovirus	15			1	1	1	1	1	0		27.4	44	56						32
male	1.955		1	infectious Mononucleosis					1	1	1	0	0	0		5.31	8	27						28
male	3.75	1	0	infectious Mononucleosis	cytomegalovirus	18			1	1	1	1	1	1		4.42	20	31						15
male	4.6667	1	1	infectious Mononucleosis	Mycoplasma	18			1	1	1	1	1	1		13.41	163	221						31
male	3.25	1	1	infectious Mononucleosis	Mycoplasma/Parvovirus	few			1	1	1	1	1	1		6.09	46	31						20
male	15.1667	1	1	infectious Mononucleosis		7			1	1	1	1	0	0		5.07	27	23						17
female	11.75	1	1	infectious Mononucleosis		5			1	1	1	1	0	0		5.37	17	37						65
female	2.3333	1	1	infectious Mononucleosis	cytomegalovirus	20			1	1	1	1	1	0		6.69	118	87						50
male	5.5833		1	infectious Mononucleosis		few			1	1	1	1	1	0		10.24	347	243						143
male	4.5		1	infectious Mononucleosis	cytomegalovirus/Mycoplasma	10			1	1	1	0	0	0		13.26	25	45						74
male	1.3498	1	0	infectious Mononucleosis		9			1	1	1	0	0	0		6.88	16	36						41
female	1.5943	1	1	infectious Mononucleosis	cytomegalovirus	14			1	1	1	1	1	0		15.95	46	64						71
male	1.8048		0	infectious Mononucleosis	cytomegalovirus	few			1	1	1	1	1	0		23.82	162	128						106
male	5	1	0	infectious Mononucleosis					1	1	1	0	0	1		3.1	27	58						90
male	3.1667	1	1	infectious Mononucleosis		16			1	1	1	0	0	1		7.42	24	78						134
male	2.1667	1	1	infectious Mononucleosis		18			1	1	1	1	1	1		12.28	361	163						9
female	4.3333	1	0	infectious Mononucleosis		few			1	1	1	1	1	0		2.74	99	141						22
male	1.4221	1	1	infectious Mononucleosis	cytomegalovirus	10			1	1	1	1	0	0		7.45	44	55						13
male	7.25	1	1	infectious Mononucleosis		few			1	1	1	1	1	1		5.12	30	36						35
male	3.8333	1	1	infectious Mononucleosis		7			1	1	1	0	0	1		5.05	61	31						26
male	4.6667	1	0	infectious Mononucleosis	cytomegalovirus	30			1	1	1	1	0	0		18.4	354	674						47
male	3.0833	1	1	infectious Mononucleosis		10			1	1	1	0	0	1		7.43	13	37						37
female	2.0833		1	infectious Mononucleosis	cytomegalovirus				1	1	1	1	0	1		5.27	315	268						93
female	3.25	1	1	infectious Mononucleosis					0	1	1	1	1	0		6.04	86	61						51
male	4.3333		0	infectious Mononucleosis	Mycoplasma	18			1	1	1	1	1	0		6.34	53	87						117
male	2.6667	1	1	infectious Mononucleosis	cytomegalovirus/Mycoplasma	5			1	1	1	0	0	0		3.22	14	39						32
male	7.5833	1	1	infectious Mononucleosis		10			1	1	1	1	1	1		8.99	326	353						29
male	4.1667	1	1	infectious Mononucleosis	cytomegalovirus	12			1	1	1	1	1	0		13.71	24	39						11
male	3.5	1	1	infectious Mononucleosis	cytomegalovirus	10			1	1	1	0	1	1		5.43	30	31						11
male	5.5833	1	1	infectious Mononucleosis		7			1	1	1	0	0	0		5.55	40	65						28
male	2.6667	1	1	infectious Mononucleosis	cytomegalovirus/Mycoplasma	16			1	1	0	1	1	1		8.46	160	85						19
male	0.5833	1	1	infectious Mononucleosis		few			1	1	1	1	1	0		3.12	15	19						10
male	4.1667	1	0	infectious Mononucleosis	cytomegalovirus	16			1	1	1	1	1	1		7.5	80	54						10
male	4.3333	2	0	infectious Mononucleosis		5			1	1	1	1	0	0		6.14	33	55						47
male	0.7434	1	0	infectious Mononucleosis		8			1	1	1	0	0	1		10.6	212	183						18
male	9.5833	1	1	infectious Mononucleosis		8			1	1	1	0	0	0		9.71	146	133						51
male	6.9167	1	1	infectious Mononucleosis	Mycoplasma/cytomegalovirus	7			1	1	1	1	0	1		7.59	12	26						29
female	3		1	infectious Mononucleosis	cytomegalovirus	14			1	1	1	1	0	1		4.82	31	53						54
male	6.1667		0	infectious Mononucleosis	Mycoplasma	7			1	1	1	1	1	0		7.18	832	1039						1
male	1.9386	1	0	infectious Mononucleosis	Parvovirus	12			1	1	1	1	0	1		7.27	56	87						10
male	5.1667	1	1	infectious Mononucleosis	Parvovirus/Mycoplasma	few			0	0	1	1	1	0		7.34	1090	1165						12
male	8		1	infectious Mononucleosis	Mycoplasma	few			1	1	1	1	1	0		12.46	29	67						61
female	1.1053	1	1	infectious Mononucleosis	Mycoplasma/Candida	9			1	1	1	1	1	1		4.62	150	112						30
female	4.4167	1	0	infectious Mononucleosis	Mycoplasma	28			1	1	1	1	1	1		15.46	78	95						26
male	3.75	1	1	infectious Mononucleosis		few			1	1	1	1	0	0		6.87	44	47						32
female	5.3333	1	0	infectious Mononucleosis	Mycoplasma/Streptococcus	22			1	1	1	1	0	0		7.98	53	38						8
male	11.4167		1	infectious Mononucleosis	Mycoplasma	13			1	1	1	1	0	0		14.08	46	47						22
male	5.5	1	1	infectious Mononucleosis	Mycoplasma				1	0	1	1	0	0		6.26	101	71						34
female	3.75	1	1	infectious Mononucleosis	Mycoplasma	11			1	1	1	1	0	0		12.06	43	58						29
female	2.5833	1	1	infectious Mononucleosis	cytomegalovirus/Mycoplasma	8			1	1	1	1	1	0		13.38	55	59						14
female	6.0833	1	1	infectious Mononucleosis	cytomegalovirus/Mycoplasma	15			1	1	1	1	1	1		8.69	153	80						21
male	5.5	1	0	infectious Mononucleosis	cytomegalovirus	10			0	1	1	1	1	0		13.67	20	36						28
female	2.8333	1	1	infectious Mononucleosis		9			1	1	1	1	0	0		8.39	74	38						27
male	11.5833	1	1	infectious Mononucleosis	cytomegalovirus	few			1	1	1	1	0	0		5.15	28	41						17
male	10.0833	1	0	infectious Mononucleosis	Streptococcus	11			1	1	1	1	0	1		3.17	228	120						13
female	8.1667	1	1	infectious Mononucleosis	Mycoplasma	14			1	1	1	1	1	1		17.99	113	74						28
female	4.6667	1	1	infectious Mononucleosis	Mycoplasma	11			1	1	1	1	1	0		11.65	90	91						20
male	3.75	1	1	infectious Mononucleosis	cytomegalovirus	12			1	1	1	1	0	1		8.29	23	37						53
male	6.4167		1	infectious Mononucleosis		15			1	1	1	1	1	1		7.16	255	153						74
male	6.75	1	1	infectious Mononucleosis		8			1	1	1	0	0	0		9.11	18	37						19
female	7.6667	1	1	infectious Mononucleosis	cytomegalovirus	12			1	1	1	0	1	0		3.53	226	167						14
female	9	1	0	infectious Mononucleosis		25			1	1	1	1	1	0		16.58	162	148						25
female	7	1	1	infectious Mononucleosis	Mycoplasma/Streptococcus	10			1	1	1	1	0	0		12.36	17	44						48
male	1.6886	1	1	infectious Mononucleosis	cytomegalovirus	9			1	1	1	1	1	1		9.29	40	51						83
female	2.9167	1	1	infectious Mononucleosis		30			1	1	1	1	0	0		13.88	47	43						31
female	3.4167	1	0	infectious Mononucleosis		19			1	1	1	0	0	1		7.8	19	40						44
male	2.25	1	1	infectious Mononucleosis	cytomegalovirus	few			1	1	1	1	1	0		5.03	169	104						11
male	7.75	1	1	infectious Mononucleosis	cytomegalovirus	12			1	1	1	0	0	1		10.33	14	26						28
male	6.5	1	0	infectious Mononucleosis	Mycoplasma	9			1	1	1	1	0	0		10.78	51	77						61
male	1.858	1	1	infectious Mononucleosis	cytomegalovirus	8			1	1	1	1	0	0		8.26	30	37						30
female	3.3333	1	0	infectious Mononucleosis		5			1	1	1	1	1	0		6.41	62	74						27
female	5.1667	1	1	infectious Mononucleosis	Mycoplasma/cytomegalovirus				1	1	1	0	0	0		18.78	678	342						33
male	7.1667	1	1	infectious Mononucleosis		12			1	1	1	0	0	0		10.11	20	76						134
male	1.2555	1	0	infectious Mononucleosis	cytomegalovirus	13			1	1	1	0	0	1		9.87	47	72						48
male	2.9167	1	1	infectious Mononucleosis		few			1	1	1	0	0	0		6.76	1	16						37
female	3.75	1	0	infectious Mononucleosis	Mycoplasma	15			1	1	1	1	1	1		11.1	174	90						23
female	4.5	1	1	infectious Mononucleosis	cytomegalovirus	11			1	1	1	1	1	0		9.37	179	143						14
female	7	1	1	infectious Mononucleosis	Mycoplasma/cytomegalovirus	18			1	1	1	1	0	1		10.65	65	66						149
female	2.3333	1	1	infectious Mononucleosis	cytomegalovirus	14			1	1	1	1	0	1		2.07	69	39						15
female	7	1	1	infectious Mononucleosis	cytomegalovirus	20			1	1	1	1	1	1		24.07	332	533						105
male	2.0833	1	0	infectious Mononucleosis	cytomegalovirus	12			1	1	1	1	1	0		7.12	57	85						78
male	1.5164	1	1	infectious Mononucleosis	cytomegalovirus	20			1	1	1	1	1	1		6.9	272	76						32
male	4.25	1	1	infectious Mononucleosis	Mycoplasma	18			1	1	1	1	0	1		4.74	26	24						24
female	4.8333	1	1	infectious Mononucleosis	cytomegalovirus	15			1	1	1	0	0	1		4.93	29	43						29
female	6.5	1	0	infectious Mononucleosis		10			1	1	1	1	0	0		7.58	311	186						26
female	5.75	1	1	infectious Mononucleosis		8			1	1	1	1	0	0		5.18	30	42						46
female	2.6667		1	infectious Mononucleosis	cytomegalovirus				0	1	1	1	0	1		6.4	97	89						57
female	4.8333	1	1	infectious Mononucleosis	Mycoplasma	18			1	1	0	1	0	1		11.38	917	702						94
male	3.1667	1	1	infectious Mononucleosis	cytomegalovirus	22			1	1	1	1	1	0		15.7	207	55						21
male	2.0833	1	1	infectious Mononucleosis		20			1	1	1	0	0	1		8.77	122	115						107
female	2.4167	1	1	infectious Mononucleosis		12			1	1	1	1	1	0		16.41	377	238						22
male	4.4167		1	infectious Mononucleosis		20			1	1	1	0	0	0		5.65	22	59						34
female	0.9523	1	0	infectious Mononucleosis	Mycoplasma	20			1	1	1	0	0	1		22.74	132	100						27
male	0.6995	1	1	infectious Mononucleosis		23			1	1	1	1	1	0		4.06	205	268						34
male	6.75		1	infectious Mononucleosis					1	1	0	0	0	1		6.58	155	121						31
male	4.1667	1	1	infectious Mononucleosis	cytomegalovirus	25			1	1	1	1	0	0		11.39	95	93						28
male	11	1	1	infectious Mononucleosis	cytomegalovirus	35			1	1	1	1	0	1		11.45	104	108						21
female	8.6667		1	infectious Mononucleosis	cytomegalovirus	10			1	0	1	1	0	0		8.23	13	28						29
male	3.25	1	0	infectious Mononucleosis	Mycoplasma/cytomegalovirus	20			1	0	1	1	1	0		17.33	989	925						57
male	1.824	1	1	infectious Mononucleosis	cytomegalovirus	10			1	1	0	1	1	0		18.34	181	278						66
male	1.0301	1	0	infectious Mononucleosis		15			1	1	1	1	0	0		6.31	57	41						20
male	9.4167	1	1	infectious Mononucleosis	Mycoplasma	8			0	0	1	1	1	0		18.05	52	69						26
male	1.063	1	1	infectious Mononucleosis		10			1	0	1	1	0	1		9.88	47	67						40
male	3.1667	1	1	infectious Mononucleosis		12			1	1	1	1	0	1		8.25	145	51						37
female	4.3333		0	infectious Mononucleosis		15			1	1	1	0	0	0		2.02	23	34						31
male	3.6667	1	0	infectious Mononucleosis	Mycoplasma	10			1	1	1	1	1	0		4.53	11	22						19
male	4.4167	1	1	infectious Mononucleosis	cytomegalovirus	10			1	1	1	1	1	1		10.95	36	49						21
male	6.5833	1	0	infectious Mononucleosis		20			1	1	1	1	1	1		2.98	38	79						58
female	7.5833	1	1	infectious Mononucleosis	cytomegalovirus/Mycoplasma	18			1	1	1	1	0	0		14.03	52	55						41
male	2	1	0	infectious Mononucleosis		10			1	1	1	1	0	0		9.84	163	89						25
female	2.1667	1	1	infectious Mononucleosis		10			1	1	1	1	0	0		8.79	104	81						26
female	6.0833	1	1	infectious Mononucleosis	Mycoplasma	12			1	1	1	1	1	0		7.72	21	40						29
male	1.8103	1	1	infectious Mononucleosis		8			1	1	1	1	0	0		8.92	15	40						42
female	2.3333	1	1	infectious Mononucleosis	cytomegalovirus	15			1	1	1	1	1	0		6.83	39	56						66
male	3.1667	1	1	infectious Mononucleosis	cytomegalovirus/Mycoplasma	few			1	1	1	1	1	0		3.53	29	33						28
male	5.0833	1	1	infectious Mononucleosis	cytomegalovirus/Mycoplasma	15			1	1	1	1	0	0		6.84	24	33						16
female	4.4167	1	1	infectious Mononucleosis	cytomegalovirus	12			1	1	1	1	1	1		2.7	16	36						54
male	2.9167	1	0	infectious Mononucleosis	cytomegalovirus	10			1	1	1	1	0	1		5.65	92	66						27
male	5.0833	1	1	infectious Mononucleosis	cytomegalovirus/Mycoplasma	few			0	1	1	1	0	0		8.13	874	570						24
female	3.3333	1	1	infectious Mononucleosis	cytomegalovirus	few			1	1	1	1	0	1		5.28	57	63						31
female	8.0833	1	1	infectious Mononucleosis		18			1	1	1	1	0	1		9.62	25	27						18
male	2.25	1	1	infectious Mononucleosis	cytomegalovirus	19			1	1	1	1	0	1		15.28	54	67						32
male	4.4167	1	0	infectious Mononucleosis		8			1	1	1	0	0	0		10.23	63	56						32
female	9.75	1	0	infectious Mononucleosis	cytomegalovirus/Mycoplasma	10			1	1	1	1	1	1		6.46	270	404						44
female	4.75	1	1	infectious Mononucleosis		13			1	1	1	1	0	1		9.99	288	126						25
female	2.25	1	1	infectious Mononucleosis	cytomegalovirus/Mycoplasma	15			1	1	1	1	1	1		5.98	213	101						36
female	1.6858	1	0	infectious Mononucleosis	cytomegalovirus	15			1	1	1	1	0	0		7.25	42	37						34
male	2.9167	1	0	infectious Mononucleosis	Mycoplasma	7			1	1	1	1	1	1		7.07	30	44						61
male	1.466	1	0	infectious Mononucleosis		12			1	1	1	1	1	0		6.45	19	48						70
female	5.75	1	1	infectious Mononucleosis					0	1	1	1	0	0		5.87	70	76						22
male	2.6667	1	0	infectious Mononucleosis	cytomegalovirus	20			1	1	1	1	1	1		8.54	292	187						26
female	6.5	1	1	infectious Mononucleosis	cytomegalovirus	few			1	1	0	0	0	1		6.83	28	23						25
male	4.5833	1	1	infectious Mononucleosis	cytomegalovirus	13			0	1	1	1	1	0		4.88	98	88						19
male	7.5		1	infectious Mononucleosis	Mycoplasma	20			1	1	1	1	0	0		15.67	602	560						71
male	3.1667	1	1	infectious Mononucleosis		20			1	1	1	1	1	1		12.79	34	84						85
male	2.9167	1	1	infectious Mononucleosis	cytomegalovirus/Mycoplasma	20			1	1	1	0	0	1		12.1	410	170						58
male	12.5833	1	1	infectious Mononucleosis	Mycoplasma	few			1	1	1	1	1	0		7.92	74	67						39
male	4.5833	1	1	infectious Mononucleosis	cytomegalovirus/Mycoplasma	25			1	1	1	1	1	1		11.32	35	43						112
male	8.5833	1	1	infectious Mononucleosis	Mycoplasma	28			0	1	1	1	0	0		10.63	27	81						123
male	4.9167	1	1	infectious Mononucleosis	Mycoplasma	15			1	1	1	1	0	0		7.58	15	59						1
male	2.9167	1	0	infectious Mononucleosis	Mycoplasma	15			1	1	1	1	1	0		33.84	206	217						32
female	3.8333		0	infectious Mononucleosis	cytomegalovirus/Mycoplasma/Parvovirus	16			1	1	1	1	1	1		13.71	49	51						19
male	5.9167	1	0	infectious Mononucleosis					1	1	1	0	0	0		2.83	33	73						137
male	1.9742		1	infectious Mononucleosis		9			1	1	1	1	1	1		7.59	219	137						85
male	1.7829	1	1	infectious Mononucleosis	Mycoplasma/cytomegalovirus				1	1	1	0	0	0		5.48	4	30						46
male	1.9386	1	1	infectious Mononucleosis	Mycoplasma	15			1	1	1	1	0	1		10.85	149	100						62
female	6.1667	1	1	infectious Mononucleosis	cytomegalovirus	29			0	1	1	1	0	1		10.94	24	29						27
female	3.4167	1	1	infectious Mononucleosis	cytomegalovirus/Mycoplasma				1	1	1	0	0	0		5.87	61	59						41
male	10.25	1	1	infectious Mononucleosis	cytomegalovirus/Respiratory syncytial virus	35			1	1	1	0	0	0		7.46	66	67						29
male	4.9167		1	infectious Mononucleosis	cytomegalovirus/Mycoplasma	10			1	1	1	0	0	0		6.19	17	44						30
male	1.0137	1	0	infectious Mononucleosis		20			1	1	1	1	0	0		5.15	13	26						23
female	5.8333	1	1	infectious Mononucleosis	Mycoplasma	11			1	0	0	1	1	1		4.53	16	34						22
male	2.1667	1	0	infectious Mononucleosis		12			1	1	1	1	0	1		7.95	71	63						27
female	2.3333	1	0	infectious Mononucleosis		20			1	1	1	1	1	1		7.79	108	117						1
male	4	1	1	infectious Mononucleosis		few			1	1	1	1	0	0		4.23	27	34						26
male	3.1667	1	1	infectious Mononucleosis	Mycoplasma/cytomegalovirus/Parvovirus	12			1	1	1	1	0	1		2.6	26	44						24
male	5.4167	1	1	infectious Mononucleosis		5			1	1	1	0	1	0		10.32	364	186						33
male	8.4167	1	1	infectious Mononucleosis	Mycoplasma	8			0	1	1	1	1	1		6.9	28	79						103
male	3	1	0	infectious Mononucleosis	cytomegalovirus	35			1	1	1	1	0	0		11.77	217	203						34
female	2.5	1	1	infectious Mononucleosis	Mycoplasma/cytomegalovirus	40			1	1	1	0	0	0		16.47	82	59						51
female	5.25		0	infectious Mononucleosis		17			1	1	1	1	1	1		9.87	279	304						26
female	4.75	1	1	infectious Mononucleosis		18			1	1	1	0	0	1		10.38	22	41						30
male	2.1667	1	1	infectious Mononucleosis		20			0	1	1	1	0	0		4.95	15	36						49
male	5.0833	1	0	infectious Mononucleosis		22			1	1	1	0	0	1		7.53	19	39						40
female	5.9167	1	1	infectious Mononucleosis	Mycoplasma	15			1	1	1	1	1	1		11.16	130	86						40
female	4.0833		1	infectious Mononucleosis	Mycoplasma	25			1	1	1	1	1	1		3，69	288	151						24
male	8.3333	1	0	infectious Mononucleosis	Streptococcus/Mycoplasma/cytomegalovirus	18			1	1	1	1	1	1		8.02	62	63						31
male	12.6667	1	0	infectious Mononucleosis	Mycoplasma	25			1	1	1	0	0	1		3.83	17	29						46
male	1.063	1	0	infectious Mononucleosis		12			1	1	1	1	0	1		7.1	52	63						42
female	2.0833	1	1	infectious Mononucleosis	cytomegalovirus/Mycoplasma	10			1	1	1	0	0	1		3.42	77	112						54
female	4.5	1	0	infectious Mononucleosis	cytomegalovirus/Mycoplasma	40			1	0	1	1	1	0		22.7	112	78						26
male	1.3322	1	0	infectious Mononucleosis	cytomegalovirus	20			1	1	1	0	1	1		6.49	23	39						21
female	2.6667	1	1	infectious Mononucleosis	cytomegalovirus/Mycoplasma	10			1	1	1	1	0	0		5.6	90	121						55
male	3	1	1	infectious Mononucleosis	cytomegalovirus/Mycoplasma	30			1	1	1	1	1	1		8.88	20	41						18
female	5.0833	1	1	infectious Mononucleosis	cytomegalovirus/Mycoplasma	10			1	1	1	1	1	1		4.46	18	51						100
male	9.4167	1	1	infectious Mononucleosis	Mycoplasma	10			1	1	1	1	0	1		5.76	82	170						66
male	1.858	1	1	infectious Mononucleosis	Mycoplasma/Parvovirus	18			1	1	1	0	1	1		3.92	26	24						55
male	6.4167	1	1	infectious Mononucleosis	Streptococcus	11			0	1	1	1	0	0		5.84	7	30						29
male	5	2	1	infectious Mononucleosis	cytomegalovirus	15			1	0	1	1	1	0		2.59	47	30						13
male	1.9441	1	0	infectious Mononucleosis		7			1	1	1	1	1	0		5.25	157	167						16
male	6	1	1	infectious Mononucleosis	Mycoplasma	25			0	1	1	1	1	0		14.54	599	331						111
male	9.1667	1	1	infectious Mononucleosis	Mycoplasma/Parvovirus	20			1	1	1	1	1	0		10.86	272	184						29
female	1.75	1	0	infectious Mononucleosis	cytomegalovirus	12			1	1	1	0	1	1		6.01	223	201						96
female	5.0833	1	1	infectious Mononucleosis	cytomegalovirus	20			1	1	1	1	1	1		13.99	152	101						120
male	6.1667	1	1	infectious Mononucleosis	cytomegalovirus	20			1	1	1	0	1	1		4.84	46	71						60
male	6.6667	1	1	infectious Mononucleosis	Mycoplasma	20			1	1	1	1	1	0		5.44	23	39						81
female	6.25	1	1	infectious Mononucleosis	Mycoplasma				1	1	1	1	0	1		5.22	124	76						25
female	6.4167	1	1	infectious Mononucleosis	Mycoplasma	15			1	1	1	1	0	0		13.1	36	49						20
female	2.25	1	1	infectious Mononucleosis		25			1	1	1	1	1	1		7.64	63	48						24
female	3.5	1	1	infectious Mononucleosis	Mycoplasma	18			1	1	1	1	0	1		15.39	31	50						28
male	2.75	1	1	infectious Mononucleosis	Mycoplasma	18			1	1	1	1	0	1		14.84	329	186						28
male	4.5	1	1	infectious Mononucleosis	Mycoplasma	20			1	1	1	1	0	0		12.26	19	51						40
male	1.4331	1	1	infectious Mononucleosis		10			1	1	1	1	0	0		3.46	45	43						81
female	2.25	1	0	infectious Mononucleosis	cytomegalovirus	14			0	1	1	1	1	1		19.77	74	96						122
male	3.3333	1	1	infectious Mononucleosis	Mycoplasma	11			1	1	1	1	1	0		5.23	14	23						15
male	5.25	1	1	infectious Mononucleosis	Mycoplasma	18			1	1	1	1	1	1		4.65	55	68						67
female	4.75	1	1	infectious Mononucleosis		28			1	1	1	0	1	0		5.43	38	38						19
female	6.0833	1	0	infectious Mononucleosis	Mycoplasma	35			1	1	1	1	1	1		9.55	135	99						30
male	3.5	1	0	infectious Mononucleosis		20			1	1	1	1	0	1		17.28	48	63						33
male	3.0833	1	1	infectious Mononucleosis	cytomegalovirus	20			1	1	1	1	1	1		13.55	62	76						51
female	1.5192	1	1	infectious Mononucleosis		12			1	1	1	0	0	0		7.81	23	34						26
female	7	1	1	infectious Mononucleosis		15			1	1	1	0	0	0		8.76	26	36						53
female	6.0833		0	infectious Mononucleosis		few			1	1	1	1	1	0		12.03	34	78						45
female	0.9769	1	1	infectious Mononucleosis	Mycoplasma/cytomegalovirus/Parvovirus	9			1	1	1	0	0	1		5.98	14	34						65
male	9.8333	1	1	infectious Mononucleosis	Mycoplasma/cytomegalovirus	10			0	1	1	1	0	1		6.28	160	50						84
female	5.5833		1	infectious Mononucleosis		8			1	1	1	1	1	1		9.43	40	56						97
female	1.9632	1	0	infectious Mononucleosis		20			0	1	1	1	0	1		5.14	50	63						83
female	9.1667	1	1	infectious Mononucleosis		25			1	1	1	1	1	1		6.08	109	52						16
male	7.0833	1	1	infectious Mononucleosis	cytomegalovirus	12			1	1	1	1	1	1		9.84	109	64						21
male	7	1	1	infectious Mononucleosis	Mycoplasma	15			0	1	1	0	0	1		7.28	496	174						19
female	6.5	1	1	infectious Mononucleosis		28			1	1	1	0	0	1		11.03	270	163						17
female	11.0833	1	1	infectious Mononucleosis	cytomegalovirus/Mycoplasma				1	1	0	1	0	0		6.18	40	95						169
male	1.5384	1	0	infectious Mononucleosis	cytomegalovirus	21			1	1	1	1	1	0		7.89	38	60						29
male	7.4167	1	0	infectious Mononucleosis	Mycoplasma/Streptococcus				1	1	1	0	0	0		10.68	70	55						36
male	6.3333	1	0	infectious Mononucleosis	cytomegalovirus	15			1	1	1	0	1	0		9.41	172	214						24
male	9.0833	1	1	infectious Mononucleosis		13			1	1	1	0	0	1		6.97	160	69						70
female	4.25	1	1	infectious Mononucleosis	Mycoplasma/cytomegalovirus				1	1	1	1	0	0		6.72	20	34						28
female	2.5833	1	1	infectious Mononucleosis		few			1	1	1	1	0	1		5.72	15	39						26
male	4.4167		0	infectious Mononucleosis		11			1	1	1	1	1	1		7.02	38	58						41
male	4.25		0	infectious Mononucleosis		7			1	1	1	1	1	0		23.88	22	61						24
male	1.0082	1	1	infectious Mononucleosis		8			1	1	1	1	1	1		7.09	38	37						19
male	2.8333	1	1	infectious Mononucleosis	cytomegalovirus	5			1	1	1	0	1	0		5.76	35	19						24
female	4.9167	1	0	infectious Mononucleosis		20			1	1	1	1	1	0		16.67	31	88						44
female	1.0192	1	0	infectious Mononucleosis		12			1	1	1	0	0	0		6.96	94	134						48
female	6.6667	1	1	infectious Mononucleosis	Mycoplasma				1	1	1	1	0	1		8.75	40	42						39
male	1	1	0	infectious Mononucleosis		8			1	1	1	1	0	1		14.7	86	69						51
male	2.5	1	1	infectious Mononucleosis	Mycoplasma	21			1	1	1	1	0	1		7.41	74	81						59
female	5.9167		1	infectious Mononucleosis		8			1	1	0	0	0	1		12.15	14	40						34
male	1.1217	1	1	infectious Mononucleosis	cytomegalovirus	few			1	1	1	1	0	1		5.32	27	37						16
male	6.6667		1	infectious Mononucleosis	Mycoplasma	56			0	1	1	0	0	1		12.13	155	124						18
male	2.8333	1	0	infectious Mononucleosis		8			1	1	1	1	1	1		14.36	39	69						64
male	2.4167	1	1	infectious Mononucleosis		22			1	1	1	0	0	0		8.42	162	51						15
male	6.3333	1	1	infectious Mononucleosis	Mycoplasma/cytomegalovirus	few			1	1	1	0	0	1		6.4	206	111						8
female	8.1667	1	1	infectious Mononucleosis		6			1	1	1	0	0	0		5.93	60	42						51
male	2.1667	1	1	infectious Mononucleosis		10			1	1	1	1	1	1		13.6	29	68						64
female	1.3909	1	1	infectious Mononucleosis	Mycoplasma	6			1	1	1	0	0	0		6.9	20	41						22
male	4.1667	1	1	infectious Mononucleosis	Streptococcus	30			1	1	1	1	0	1		19.05	142	107						35
male	4	1	1	infectious Mononucleosis	cytomegalovirus/Mycoplasma/Parvovirus	few			0	1	1	1	0	0		4.57	18	25						29
female	6.4167	1	1	infectious Mononucleosis		few			1	1	1	1	0	0		5.93	100	92						19
male	8.5833		1	infectious Mononucleosis	cytomegalovirus	30			1	1	1	0	0	1		10.37	77	68						16
male	2.25	1	1	infectious Mononucleosis	cytomegalovirus	37			1	1	1	0	0	0		8.54	102	95						39
female	3.25		1	infectious Mononucleosis		8			1	1	0	1	1	0		10.27	14	29						16
female	3.0833	1	1	infectious Mononucleosis	Mycoplasma	9			1	1	1	0	0	0		9.68	41	91						49
male	1.4018	1	1	infectious Mononucleosis		15			1	1	1	1	0	0		10.12	48	40						34
male	4.3333	1	1	infectious Mononucleosis	cytomegalovirus/Mycoplasma	10			0	1	1	1	0	0		11.64	90	119						20
female	7.5	1	1	infectious Mononucleosis	Mycoplasma	19			1	1	1	1	0	1		4.87	148	156						60
male	3.6667	1	1	infectious Mononucleosis	Mycoplasma	17			1	1	1	1	0	0		7.32	44	66						11
female	3.8333	1	1	infectious Mononucleosis	cytomegalovirus/Mycoplasma	7			1	1	1	0	0	0		7.92	55	89						29
male	5.8333	1	0	infectious Mononucleosis	Mycoplasma	5			1	1	1	0	0	0		9.5	41	36						37
male	2.75	1	1	infectious Mononucleosis		10			1	0	1	1	1	1		15.53	71	62						20
male	7	1	1	infectious Mononucleosis	cytomegalovirus	21			1	1	1	0	0	0		17.51	77	131						44
male	6.3333	1	1	infectious Mononucleosis		18			0	1	1	1	0	1		15.94	25	46						60
male	3.1667	1	1	infectious Mononucleosis	cytomegalovirus/Mycoplasma	9			1	1	1	0	0	0		5.25	44	51						53
female	8.3333	1	1	infectious Mononucleosis	cytomegalovirus/Mycoplasma/Streptococcus	35			1	1	1	0	0	0		15.31	122	67						29
female	2.75	1	1	infectious Mononucleosis		20			1	1	1	1	0	0		7.74	21	62						97
male	2.5	1	1	infectious Mononucleosis	Mycoplasma/cytomegalovirus	15			1	1	1	1	0	1		9.07	210	231						86
female	4.75	1	1	infectious Mononucleosis		few			1	1	1	1	0	1		7.9	103	94						85
female	4.8333	1	1	infectious Mononucleosis	Parvovirus/Mycoplasma	few			1	1	1	0	0	0		9.38	25	33						29
female	1.8662	1	1	infectious Mononucleosis	Parvovirus/Mycoplasma	12			1	1	1	0	0	1		4.39	72	56						64
male	4.0833	1	1	infectious Mononucleosis	cytomegalovirus/Mycoplasma	15			1	1	1	1	1	0		7.45	37	51						12
male	6.3333	1	1	infectious Mononucleosis	cytomegalovirus/Mycoplasma	25			1	1	1	1	1	1		12.71	113	85						40
female	3	1	1	infectious Mononucleosis	cytomegalovirus/Mycoplasma	15			0	1	1	1	1	0		17.26	47	55						30
male	4.5	1	0	infectious Mononucleosis	cytomegalovirus	12			1	1	1	1	0	0		16.72	71	57						23
male	3.75	1	1	infectious Mononucleosis	cytomegalovirus	25			1	1	1	1	1	1		24.34	30	48						33
female	2.25		1	infectious Mononucleosis	Mycoplasma	few			1	1	1	0	0	1		7.88	44	50						38
male	2.5833	1	1	infectious Mononucleosis	cytomegalovirus	few			1	1	1	1	1	1		13.11	24	32						29
male	2.6667		1	infectious Mononucleosis	cytomegalovirus/Mycoplasma				1	1	1	0	0	0		8.8	27	39						33
male	2.9167		1	infectious Mononucleosis	Mycoplasma/Rickettsia	few			0	1	1	1	0	1		5.25	80	67						65
female	3.8333	1	1	infectious Mononucleosis	cytomegalovirus	few			1	1	1	1	1	1		4.56	84	41						22
male	4.5833	1	1	infectious Mononucleosis	Mycoplasma/Strstreptococcus	10			1	1	1	1	1	1		14.07	178	140						24
male	6.75		1	infectious Mononucleosis		14			1	1	1	0	0	1		30.37	261	117						18
female	3.9167	1	1	infectious Mononucleosis	Mycoplasma/cytomegalovirus	30			1	1	1	1	0	0		7.66	183	153						37
male	3.8333	1	1	infectious Mononucleosis	Mycoplasma/cytomegalovirus/Parvovirus	20			1	1	1	1	1	0		12.49	92	84						55
female	5.8333	1	0	infectious Mononucleosis		30			1	1	1	1	1	0		13.85	29	68						19
male	7.9167	2	1	infectious Mononucleosis	cytomegalovirus	6			1	1	0	1	0	0		6.18	147	229						24
female	3	1	0	infectious Mononucleosis		12			1	1	1	1	0	0		11.08	38	55						54
male	7.25	1	1	infectious Mononucleosis		20			1	0	1	1	1	0		6.11	112	156						24
female	1.8662	1	0	infectious Mononucleosis	cytomegalovirus	10			1	1	1	1	1	0		18	58	49						21
female	2.3333	1	1	infectious Mononucleosis	cytomegalovirus/Mycoplasma	12			1	1	1	1	1	0		14.5	180	88						16
female	11.25	1	1	infectious Mononucleosis	Mycoplasma	31			1	1	1	0	0	0		9.32	65	52						14
male	3.3333	1	1	infectious Mononucleosis		15			1	1	1	1	0	0		11.13	34	48						25
male	9.1667	1	1	infectious Mononucleosis		25			1	1	1	1	1	0		13.57	16	34						19
male	1.4167	1	1	infectious Mononucleosis	Haemophilus influenzae	18			1	1	1	1	1	0		15.05	122	71						28
female	9		1	infectious Mononucleosis					1	1	1	0	0	0		9.32	183	84						24
female	7.25	1	1	infectious Mononucleosis	Mycoplasma	9			1	1	1	1	0	0		21.26	177	69						25
male	5	1	0	infectious Mononucleosis					1	1	1	1	1	0		12.36	13	32						41
male	4.25	1	1	infectious Mononucleosis	cytomegalovirus	30			1	1	1	1	1	0		19.77	287	304						26
female	2.5833	1	0	infectious Mononucleosis	Haemophilus influenzae	25			1	1	1	1	0	1		13.09	41	58						38
female	4.3333	1	1	infectious Mononucleosis	Mycoplasma	few			1	1	1	1	0	0		8.09	10	56						19
male	5.3333	1	1	infectious Mononucleosis		few			1	1	1	1	1	0		6.17	316	294						71
male	4.4167	1	1	infectious Mononucleosis	cytomegalovirus/Mycoplasma	15			1	0	1	1	1	1		33.65	52	61						13
female	2.3333	1	1	infectious Mononucleosis		few			1	1	1	1	1	0		7.01	28	42						54
male	3.8333	1	1	infectious Mononucleosis		8			1	1	1	0	0	1		16.94	95	83						35
female	1.9687	1	1	infectious Mononucleosis	Mycoplasma	5			1	1	1	1	1	0		8.22	41	53						39
male	6.25	1	1	infectious Mononucleosis	cytomegalovirus				1	1	1	1	1	0		9.33	43	67						56
female	3.0833	1	0	infectious Mononucleosis		10			1	1	1	1	0	0		13.14	153	181						51
male	1.6354	1	1	infectious Mononucleosis		10			1	1	1	1	1	1		15.72	104	136						103
female	6.5	1	1	infectious Mononucleosis		23			1	1	1	0	0	0		13.76	738	501						79
male	5	1	1	infectious Mononucleosis	Mycoplasma	10			1	1	1	1	0	0		6.2	12	28						25
male	3.25	1	0	infectious Mononucleosis	cytomegalovirus/adenovirus/Parvovirus	9			1	1	1	1	1	0		8.01	198	119						16
male	5.5	1	0	infectious Mononucleosis	cytomegalovirus	20			1	1	1	1	0	0		25.53	51	58						38
male	1.1491	1	1	infectious Mononucleosis	cytomegalovirus	few			1	1	1	1	0	1		21.83	203	131						99
male	2	1	1	infectious Mononucleosis	cytomegalovirus	few			1	1	1	0	0	0		12.71	34	28						18
male	6.3333	1	0	infectious Mononucleosis		8			0	0	1	1	1	1		14.4	22	46						86
male	3.5	1	1	infectious Mononucleosis	cytomegalovirus	few			1	1	1	0	0	0		12.83	108	131						26
male	6	1	1	infectious Mononucleosis					1	1	1	1	1	1		5.22	16	43						34
male	3.1667	1	0	infectious Mononucleosis	cytomegalovirus	7			1	1	1	1	1	1		12.96	27	30						18
male	5.25	1	1	infectious Mononucleosis		4			1	1	1	1	1	0		5.13	15	28						22
female	3.5	1	1	infectious Mononucleosis	cytomegalovirus	few			1	1	1	1	0	0		7.27	339	285						16
female	7.75	1	1	infectious Mononucleosis		8			1	1	1	0	0	0		11.86	18	32						44
male	2.3333	1	1	infectious Mononucleosis	cytomegalovirus	8			0	1	1	1	0	1		6.11	102	62						11
female	13.3333	1	1	infectious Mononucleosis	cytomegalovirus/Mycoplasma	7			1	1	1	1	0	1		8.43	15	49						55
male	3	1	1	infectious Mononucleosis	cytomegalovirus	13			1	1	1	0	0	0		17.41	12	31						22
male	1.4961	1	1	infectious Mononucleosis	cytomegalovirus	12			1	1	1	1	0	0		9.92	156	176						45
female	4.8333	1	1	infectious Mononucleosis					1	1	1	0	0	0		7.46	113	236						27
female	1.9155	1	1	infectious Mononucleosis	cytomegalovirus	7			1	1	1	1	1	1		6.25	17	46						68
male	4.75	1	1	infectious Mononucleosis		6			1	1	1	1	1	0		7.62	12	32						17
female	9	1	1	infectious Mononucleosis	Mycoplasma/Strstreptococcus	9			1	1	1	1	0	0		9.31	174	74						55
male	4.6667	1	1	infectious Mononucleosis	adenovirus/Mycoplasma	8			1	1	1	1	0	0		7.64	21	32						32
male	2.6667	1	0	infectious Mononucleosis	Mycoplasma/cytomegalovirus	few			1	1	1	1	1	0		5.53	24	39						17
male	2.5833	1	0	infectious Mononucleosis	Mycoplasma	few			1	1	1	0	0	0		16.85	37	31						26
male	6.0833	1	1	infectious Mononucleosis	cytomegalovirus	18			0	1	1	1	1	1		16.18	24	43						33
male	2.3333	1	1	infectious Mononucleosis	cytomegalovirus	5			1	1	1	1	0	1		13.93	65	54						30
female	2.6667	1	1	infectious Mononucleosis	Mycoplasma	few			1	1	1	1	1	0		12.58	222	204						17
female	7.6667	1	1	infectious Mononucleosis		5			1	1	1	1	0	1		8.98	105	127						19
male	6.8333	1	1	infectious Mononucleosis	cytomegalovirus	7			0	1	1	0	1	1		11.52	28	54						59
male	2.0833	1	0	infectious Mononucleosis		7			1	0	1	1	1	1		21.3	102	75						25
female	1.2801	1	1	infectious Mononucleosis	Mycoplasma/cytomegalovirus	5			1	1	1	1	0	0		21.2	115	102						14
female	2.5	1	1	infectious Mononucleosis	cytomegalovirus	13			0	1	1	1	0	0		5.47	133	157						73
male	3.4167	1	0	infectious Mononucleosis	cytomegalovirus	15			1	1	1	1	1	1		14.46	122	198						151
male	2.6667	1	1	infectious Mononucleosis		6			1	1	1	1	0	1		13.92	40	41						21
male	4.3333	1	1	infectious Mononucleosis	Mycoplasma	5			1	1	1	0	0	0		8.96	120	66						30
female	4.75	1	1	infectious Mononucleosis	cytomegalovirus				1	1	1	1	1	1		13.86	195	88						18
female	5.5833	1	1	infectious Mononucleosis	cytomegalovirus	7			1	1	1	0	0	1		7.39	26	38						29
male	2.9167	1	1	infectious Mononucleosis	cytomegalovirus				1	1	1	0	0	1		3.75	81	57						29
female	3.3333		1	infectious Mononucleosis	cytomegalovirus	few			1	1	1	0	0	0		12.14	52	60						3
male	1.9358	1	1	infectious Mononucleosis	cytomegalovirus	9			0	1	1	1	0	1		11.19	69	54						22
male	4.5	1	1	infectious Mononucleosis		8			1	1	1	1	1	0		9.84	64	90						51
female	8.6667	1	1	infectious Mononucleosis	Mycoplasma	9			0	1	1	0	0	1		5.37	13	22						13
female	6.5833	1	1	infectious Mononucleosis		6			1	1	1	1	0	1		8.18	22	46						79
male	4.3333		1	infectious Mononucleosis		8			1	1	1	1	1	0		6.69	39	67						90
male	3.9167	1	1	infectious Mononucleosis	cytomegalovirus	few			1	1	1	1	1	0		8.71	36	102						10
female	7.25		1	infectious Mononucleosis	Mycoplasma/Streptococcus	5			1	1	1	1	1	0		17.98	390	348						30
female	2.6667	1	0	infectious Mononucleosis	Mycoplasma	6			1	1	1	1	0	0		5.47	10	33						35
male	6.9167	1	1	infectious Mononucleosis	cytomegalovirus	few			1	1	1	1	0	0		5.68	37	50						75
male	2.3333		1	infectious Mononucleosis		8			1	1	1	0	1	0		7.33	248	196						68
male	4.8333	1	1	infectious Mononucleosis	cytomegalovirus/Mycoplasma	few			0	1	1	1	0	1		13.31	96	95						19
male	1.5	＜4E	0	infectious Mononucleosis	Mycoplasma	26	7	4	1	1	1	1	1	0	4.2	1.88	25	66	2.7	1.7	164	598	70	65	36.96	33.21	73.76
male	1.25	/	0	infectious Mononucleosis			6	4	1	1	1	1	0	1	6.88	5.56	20	36	1.7	1.2	145	350	123	29			84.47
female	4.667	1990000	1	infectious Mononucleosis	cytomegalovirus/Mycoplasma	9	11	10	1	1	1	1	0	1	12.36	6.49	62	87	6.2	3.8	85	903	73	52			91.95
male	3.25	7.62E+0.6	1	infectious Mononucleosis		8	2	4	1	1	1	1	1	0	12.24	7.76	17	38	4.6	3.6	192	464	104	22			80.15
male	2.166	611000	1	infectious Mononucleosis	Mycoplasma	10	3	4	1	1	1	0	0	1	21.93	15.64	11	40	6.8	1.6	162	701	106	59	17.29	62.7	86.59
female	3.5	/	0	infectious Mononucleosis		8	8	5	1	1	1	1	1	0	18.51	15.03	782	636				666	74	47
female	2.417	5850	1	infectious Mononucleosis			3	3	1	1	1	0	0	1	8.28	5.31	19	32	4.1	2.5	193	321	49	36			61.85
male	6.333	＜4.00E+02	0	infectious Mononucleosis		20	12	9	1	1	1	1	0	0	22.92	16.5	457	487	16.8	3.7	640	819	51	48
female	8.4166	647000	1	infectious Mononucleosis	Mycoplasma	25	9	17	1	1	1	1	1	0	10.73	8.25	47	79	12	6.9	214	677	53	50			92.09
female	1.666	0	0	infectious Mononucleosis		5	3	6	1	1	1	1	1	0	4.46	2.04	13	38	5	2.6	223	320	100	23			72.36
male	1.75	0	0	infectious Mononucleosis+	Mycoplasma	11	4	4	1	1	1	0	0	0	5.56	3.53	13	43	2.8	1.3	156	363	166	33			63.79
female	4.1666	1420000	1	infectious Mononucleosis+	Mycoplasma/Streptococcus	11	6	8	1	1	1	1	1	1	16.41	7.66	24	52	3.7	2.1	143	533	108	54
male	0.75		1	+infectious Mononucleosis+	Parainfluenza virus type 3			3	0	1	0	0	0	0
female	5.333	350000	1	infectious Mononucleosis+	Mycoplasma	12	13	9	1	1	1	1	0	1	6.52	5.04	243	137	9.7	5.5	364	616	108	36
female	7.0833	332000	1	infectious Mononucleosis+	Streptococcus	7	5	6	1	1	1	0	0	0	9.17	6.77	47	84	5.4	4.1	164	634	112	99			81.75
male	3.75	97600	1	infectious Mononucleosis+		few	8	4	1	1	1	1	1	1	6.85	3.4	8	24	4.1	2.8	111	449	54	40			85.43
male	0.9166	76800	1	infectious Mononucleosis+	cytomegalovirus	few	0	4	0	1	1	0	0	1
male	0.833	185000	1	infectious Mononucleosis+		8	6	6	1	1	1	1	0	0	11.86	6.57	114	48	6.2	2.8	248	376	61	19			73.47
male	2.833	5500000	1	infectious Mononucleosis+	Mycoplasma	23	9	10	1	1	1	0	1	0	16.87	11.21	34	33	8.9	5.1	139	419	40	20			85.6
male	2.0833	944000	1	infectious Mononucleosis	Mycoplasma/cytomegalovirus	11	4	4	1	1	0	0	1	0	16.81	12.13	16	33	3.2	2	161	503	91	46			83.12
male	4.166	1290000	1	infectious Mononucleosis+infectious Mononucleosis+		4.5	9	9	1	1	1	1	1	1	22.74	18.4	118	142	19.6	10	956	901	85	54
female	2.4166	40400	1	infectious Mononucleosis+		few	20	6	1	1	1	1	0	0	6.86	4.18	8	29	5.7	3.1	204	372	40	22	34.09	29.92	67.79
male	3.91666	172000	1	infectious Mononucleosis+	Mycoplasma		6	4	1	1	1	1	1	1	11	7.35	26	47	4.7	2.7	145	458	63	16
male	10		0	infectious Mononucleosis+	Mycoplasma	12	10	8	1	1	1	1	0	0	14.74	11.94	47	44	3.7	1.8	161	534	34	20
female	8.333	989000	1	infectious Mononucleosis	cytomegalovirus			6	1	0	1	0	0	0
female	5.083	185000	1	infectious Mononucleosis+	cytomegalovirus	35	0	6	0	1	1	1	1	1	12.47	10.67	22	46	4.9	2.7	183	525	86	78	11.27	72.63	89.93
male	8	＜4E+02	0	infectious Mononucleosis+	Mycoplasma	few	8	3	1	1	1	0	0	1	4.85	2.99	8	14	3.4	1.7	158	213	68	42			68.08
male	3.583		0	infectious Mononucleosis+	cytomegalovirus		6	5	1	1	1	1	0	1	16.87	13.46	150	98	5.2	2.4	407	669	113	79	10.9	72.53	90.21
female	6.4166	12900	1	infectious Mononucleosis+infectious Mononucleosis+	Mycoplasma		6	7	1	1	1	1	0	0	7.93	1.66	11	25	5.2	2.8	82	207	102	21	38.41	25.05	70.14
male	6.333	911000	1	infectious Mononucleosis+		18	9	4	1	1	1	1	1	0	9.76	6.42	31	51	5.2	2.9	207	496	40	16
male	10.833	393000	1	infectious Mononucleosis+	Mycoplasma	15	4	5	1	1	1	0	1	0	12.54	6.32	128	77	8.8	5.3	179	427	58	26
male	7.25	69300	1	infectious Mononucleosis+		few	7	6	1	1	1	0	1	1	8.89	4.55	14	30	6.8	3.8	134	395	58	16
male	8.1666	1690000	1	infectious Mononucleosis+	Mycoplasma	24	14	6	1	1	0	1	0	0	20.09	15.79	189	144	54.2	44.1	365	635	44	24
female	7.1677	89900	1	infectious Mononucleosis+			3	6	1	1	1	1	0	1	7.95	6.46	238	62			196	462
female	13.75	419000	1	infectious Mononucleosis+infectious Mononucleosis+	Mycoplasma	15	6	8	1	1	1	0	0	0	8.1	3.71	80	38	7.5	4.7	162	359	27	11			86.75
male	4.75	370000	1	infectious Mononucleosis+			7	6	1	1	1	1	0	1	6.67	0.94	29	47	7.8	5.2	104	484	51	18
male	5.833	2980	1	infectious Mononucleosis+		37	0	3	0	0	0	0	0	1	癫痫
female	4.166	322000	1	infectious Mononucleosis		16	4	6	1	1	1	1	0	0	18.96	16.44	348	310	6.9	2.9	357	644	58	29			87.37
female	5.5	60600	1	infectious Mononucleosis+	Mycoplasma	19	2	4	1	1	1	1	1	1	10.91	7.51	130	80	5.5	2.5	313	382	48	12
male	4.4166	7580	1	infectious Mononucleosis+infectious Mononucleosis+	Mycoplasma	few	9	10	1	1	1	1	1	0	11.73	3.15	1	23	3.8	2.1	103	252	53	25
